# Supplementary material for: Unified mild reaction conditions for C2-selective Pd-catalysed tryptophan arylation, including tryptophan-containing peptides
Source: Royal Society of Chemistry journal article supplement (doi:10.1039/c5ob01174d), 2015-01-01

## Supporting Information

for:

### Unified mild reaction conditions for C2-selective Pd-catalysed tryptophan arylation, including tryptophan-containing peptides

Alan J. Reay, Thomas J. Williams and Ian J. S. Fairlamb<sup>a</sup>

<sup>a</sup> Department of Chemistry, University of York, Heslington, York, YO10 5DD.

Email: [ian.fairlamb@york.ac.uk](mailto:ian.fairlamb@york.ac.uk); Tel: 0044 (0)1904 324091.

## Contents

|                                       |     |
|---------------------------------------|-----|
| 1. Peptide Arylation HPLC Data.....   | S2  |
| 2. UV-Visible Spectroscopic Data..... | S11 |
| 3. NMR spectroscopic data.....        | S18 |

## 1. Peptide Arylation HPLC Data

HPLC data for arylated peptides **4** and **6** are given in our preliminary communication on this work.<sup>1</sup>

### Arylated product of Ac-AlaTrpAla-OH **7**, **8**

HPLC-ESI-MS chromatogram (BPC) of the crude reaction material from **Method A** (arylated tryptophan donated Trp<sup>+</sup>, diarylated tryptophans donated Trp<sup>\*\*</sup>, dihydroxylated byproducts donated Trp<sup>†</sup>).

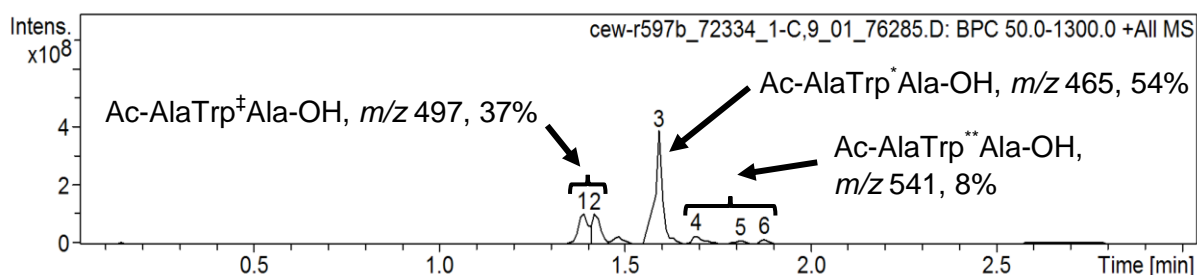

ESI-MS of the crude reaction material.

#### Cmpd 1, 1.39 min

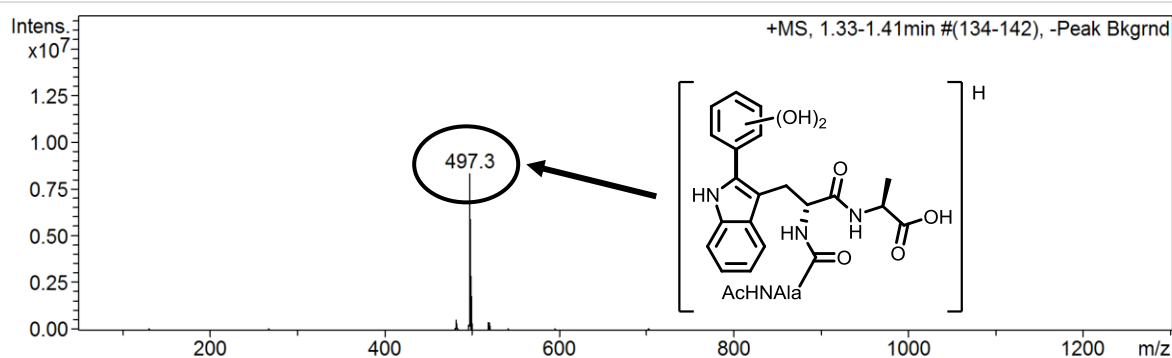

#### Cmpd 2, 1.42 min

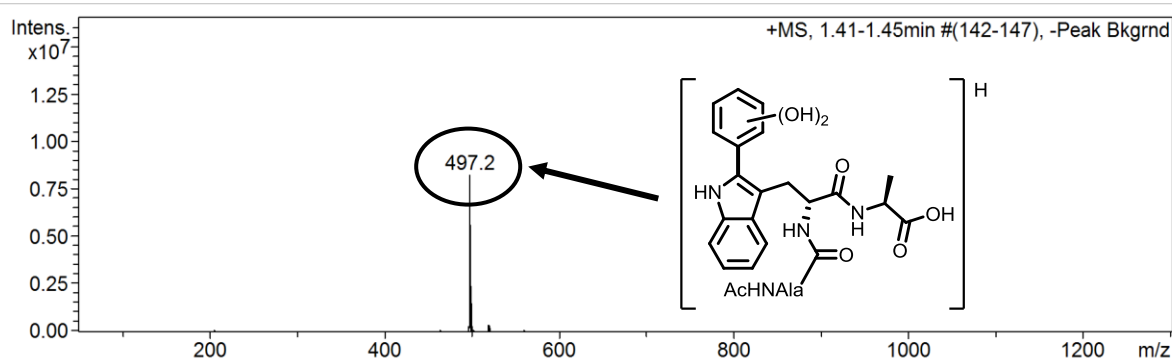

1 T. J. Williams, A. J. Reay, A. C. Whitwood and I. J. S. Fairlamb, *Chem. Commun.*, 2014, **50**, 3052.

**Cmpd 3, 1.59 min**

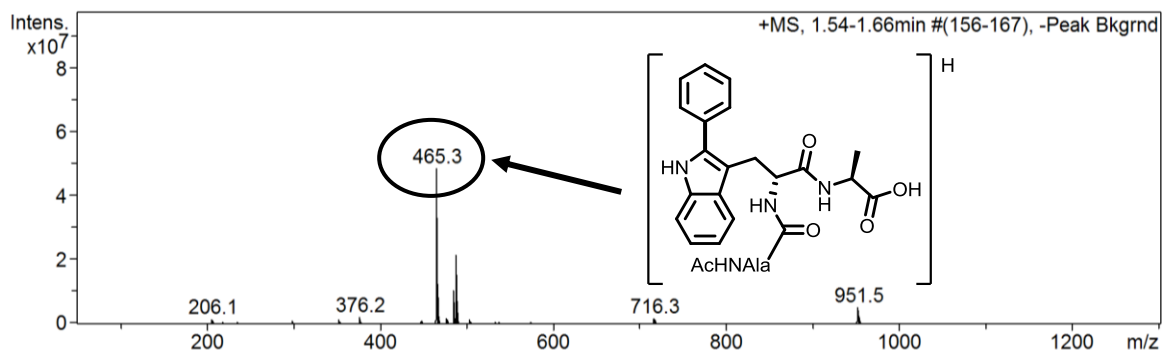

**Cmpd 4, 1.69 min**

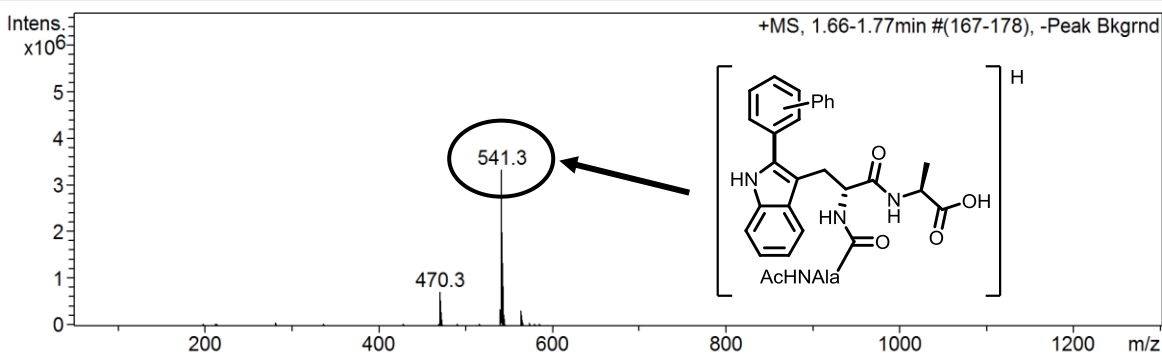

**Cmpd 5, 1.81 min**

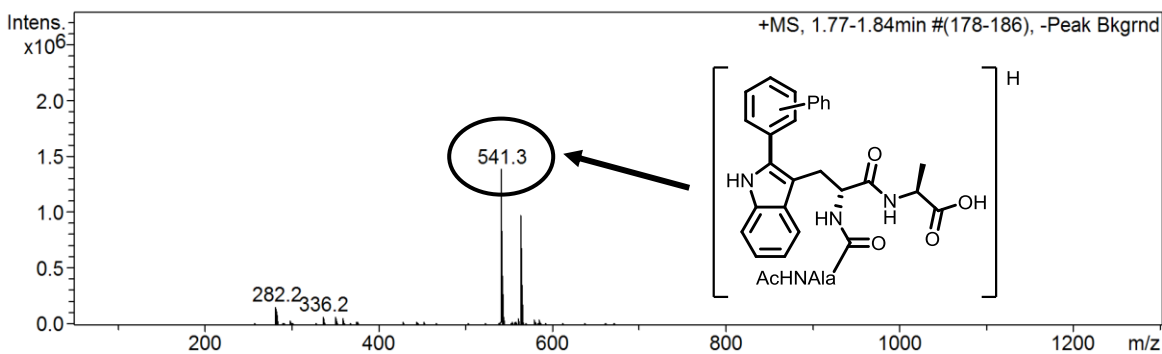

**Cmpd 6, 1.87 min**

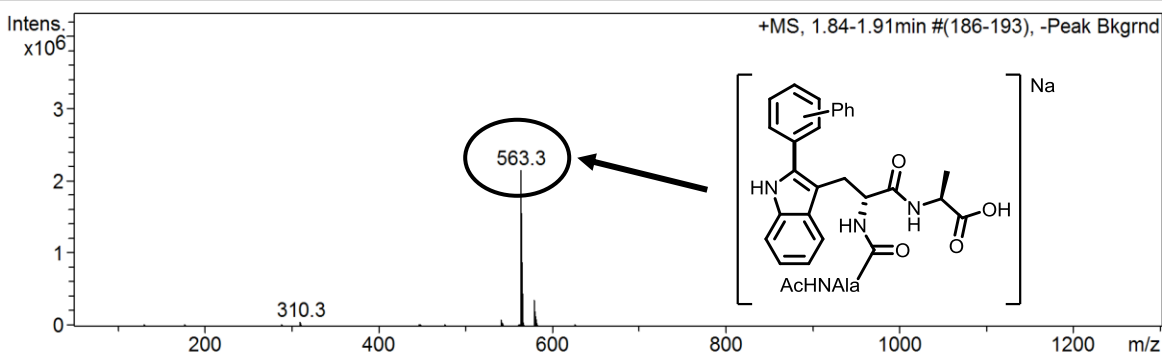

HPLC-ESI-MS chromatogram (BPC) of the crude reaction material from **Method B** (arylated tryptophan donated Trp\*, starting material donated Trp).

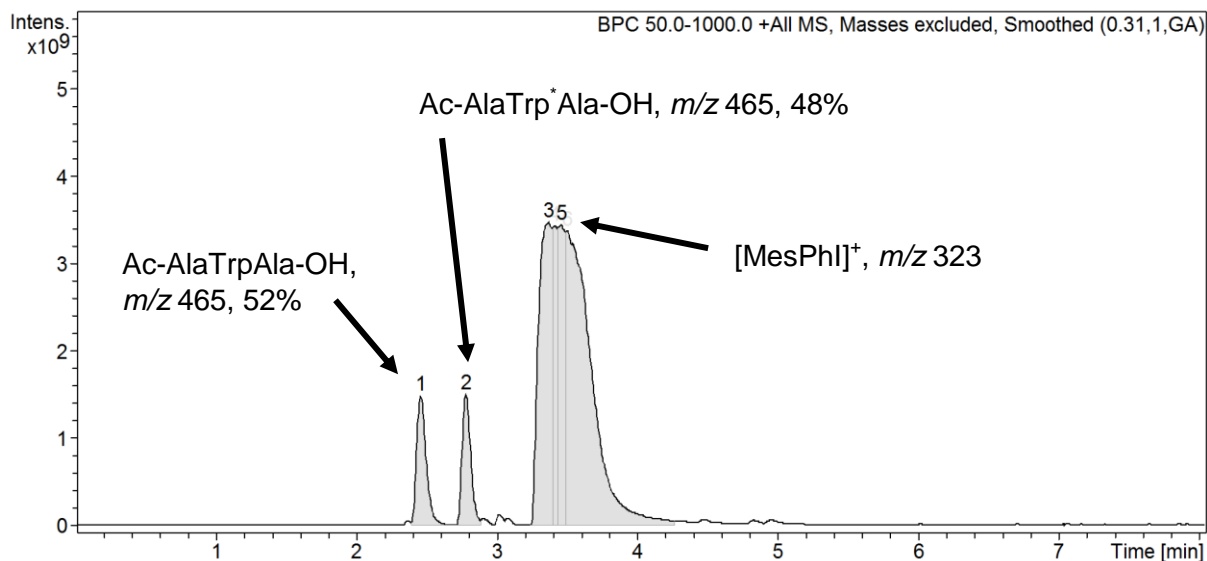

ESI-MS of the crude reaction material.

Cmpd 1, 2.5 min

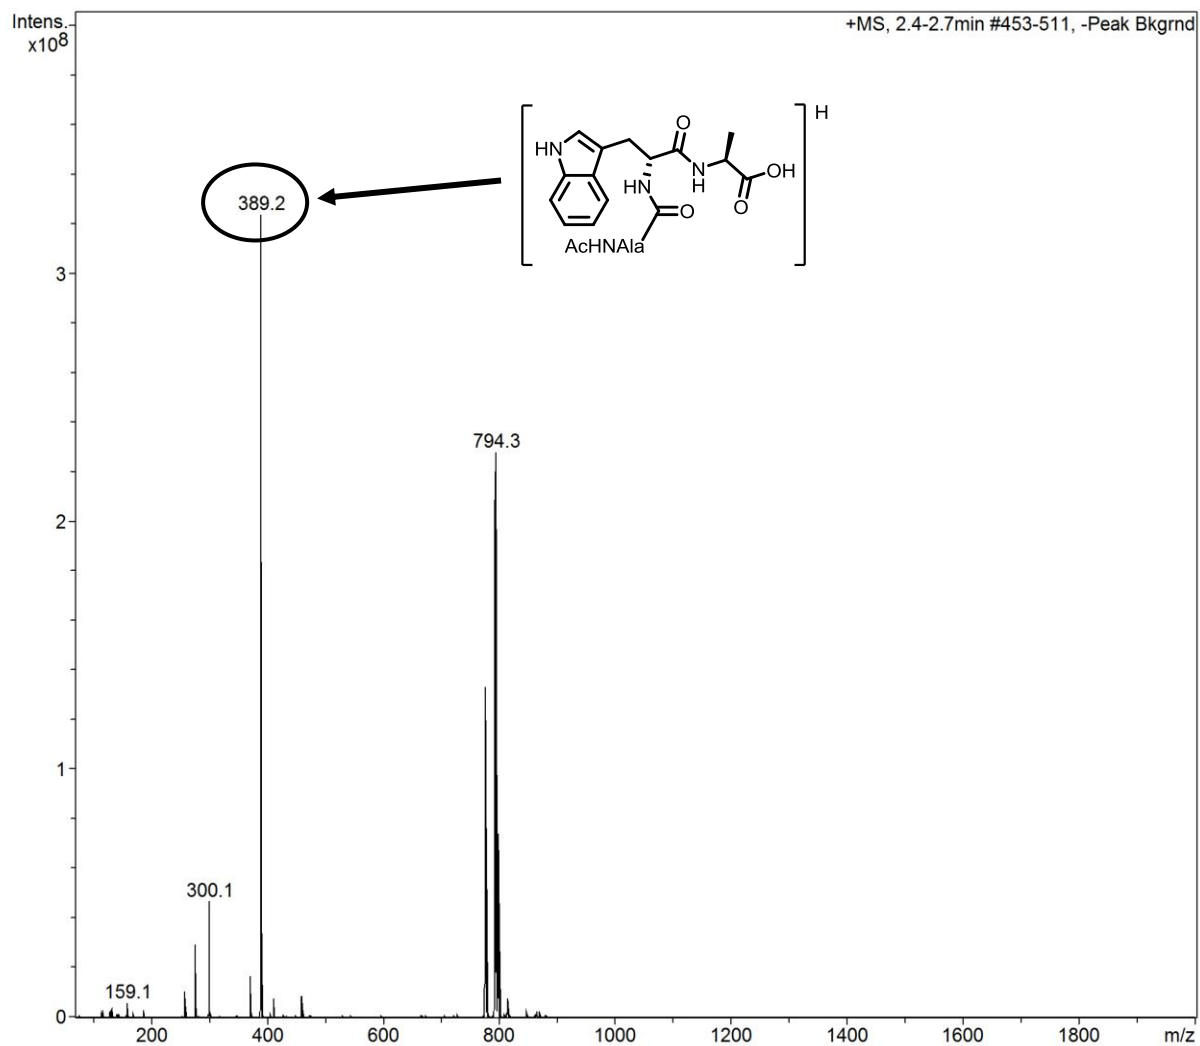

Cmpd 2, 2.8 min

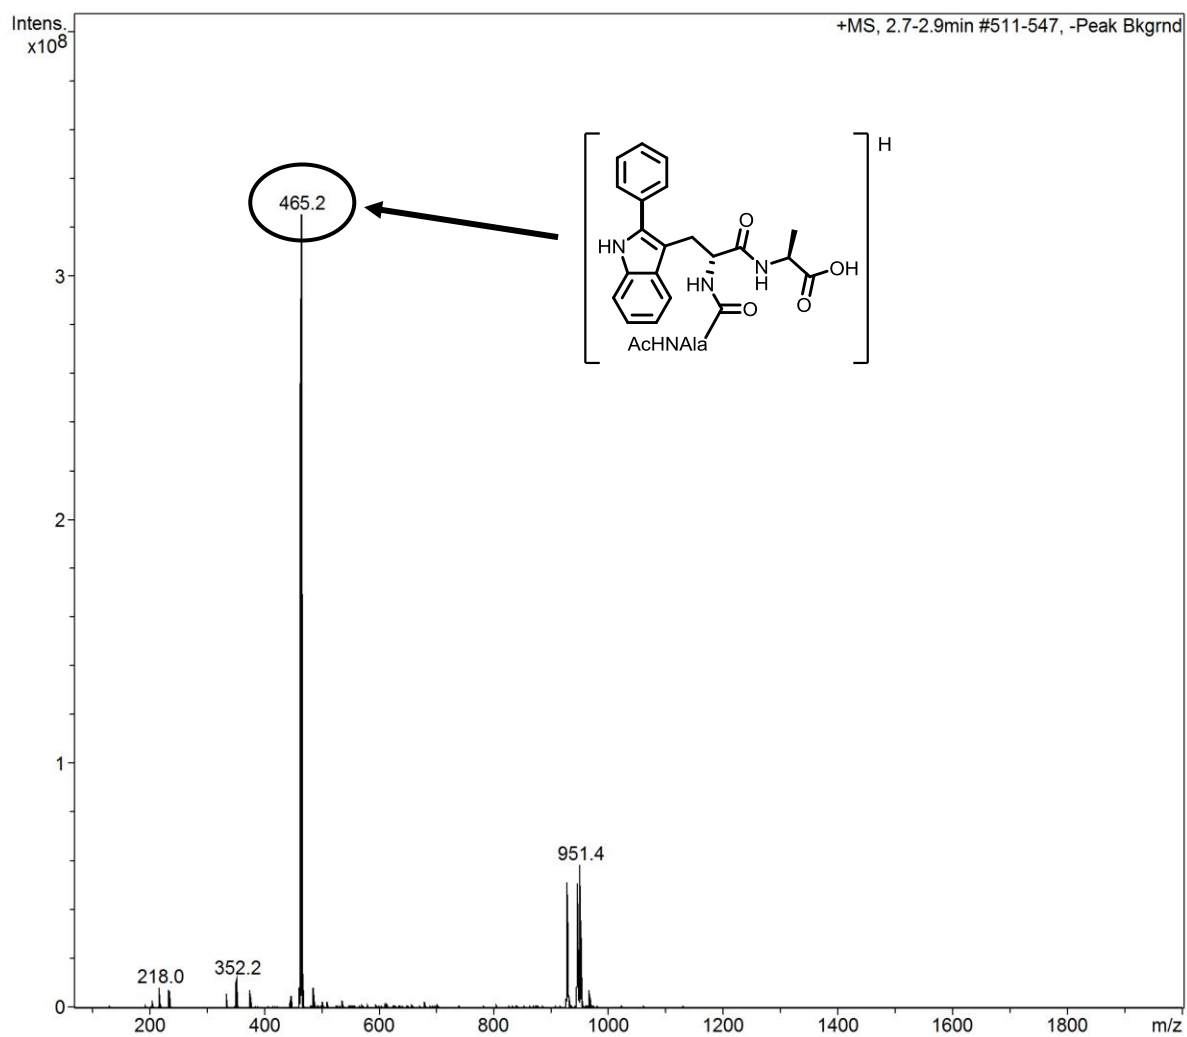

Cmpd 3, 3.4 min

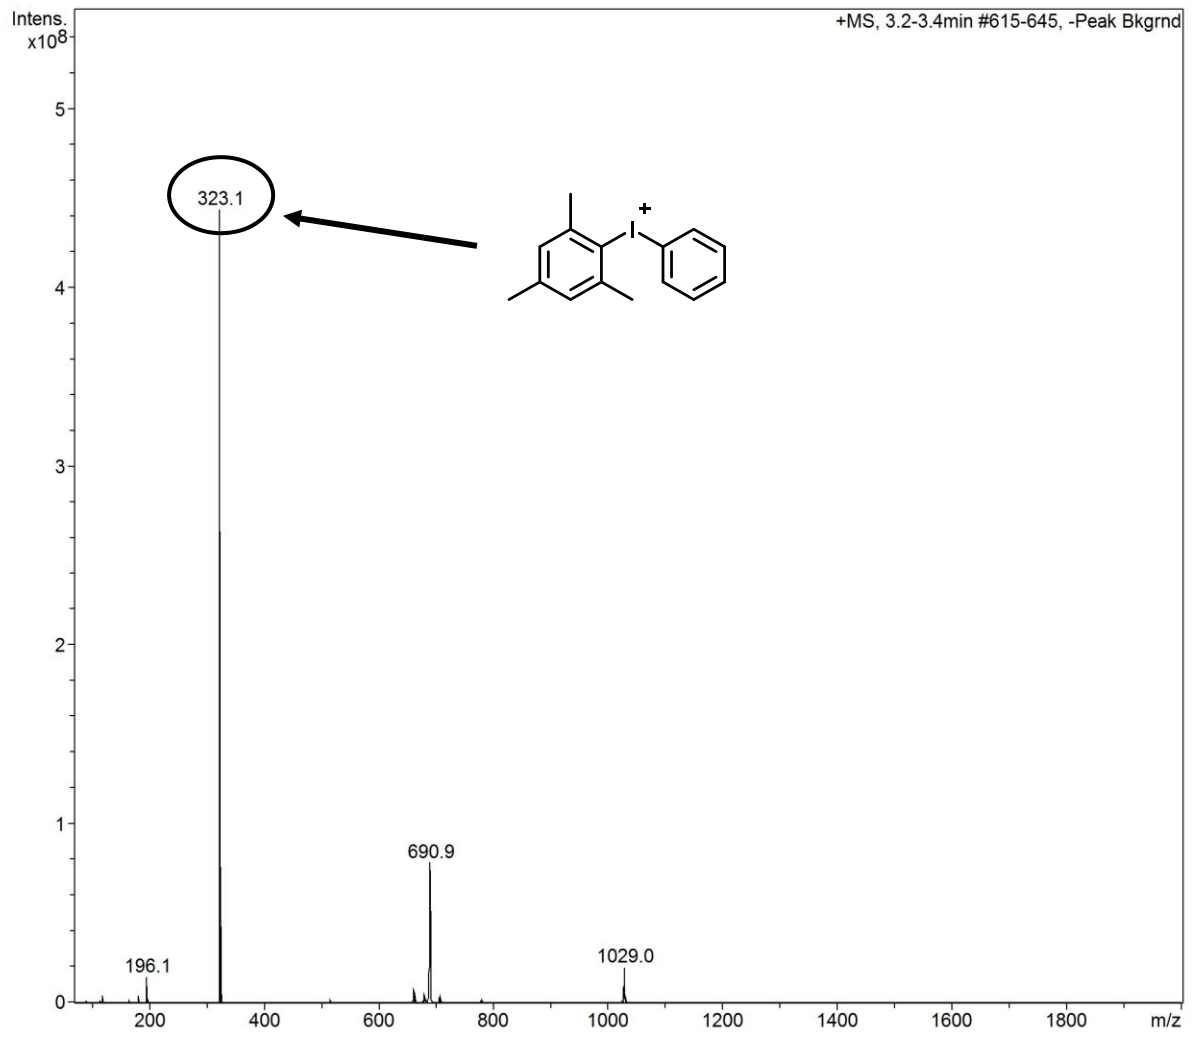

## Arylated product of Ac-SerGlyTrp<sup>+</sup>Ala-OH 9, 10.

HPLC-ESI-MS chromatogram (BPC) of the crude reaction material from **Method A** (arylated tryptophan donated Trp<sup>+</sup>, dihydroxylated byproducts donated Trp<sup>+</sup>).

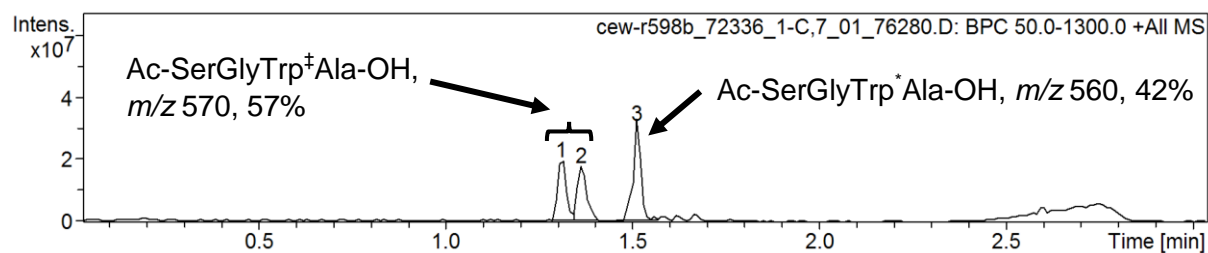

ESI-MS of the crude reaction material.

### Cmpd 1, 1.31 min

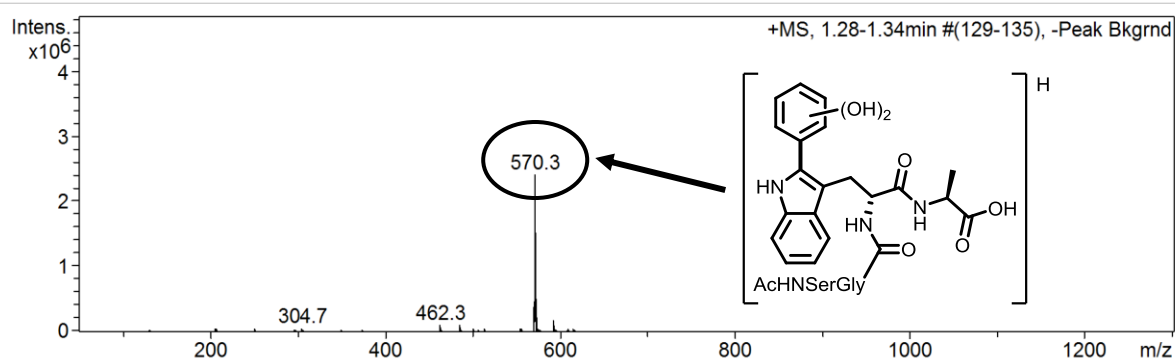

### Cmpd 2, 1.36 min

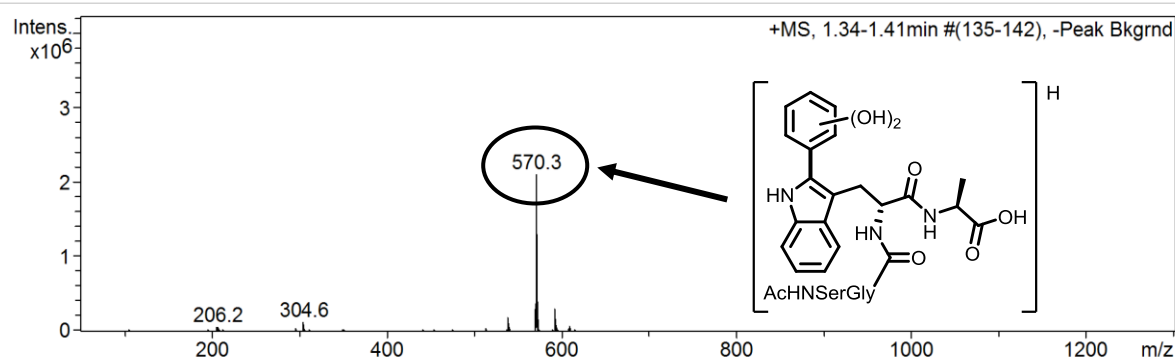

### Cmpd 3, 1.51 min

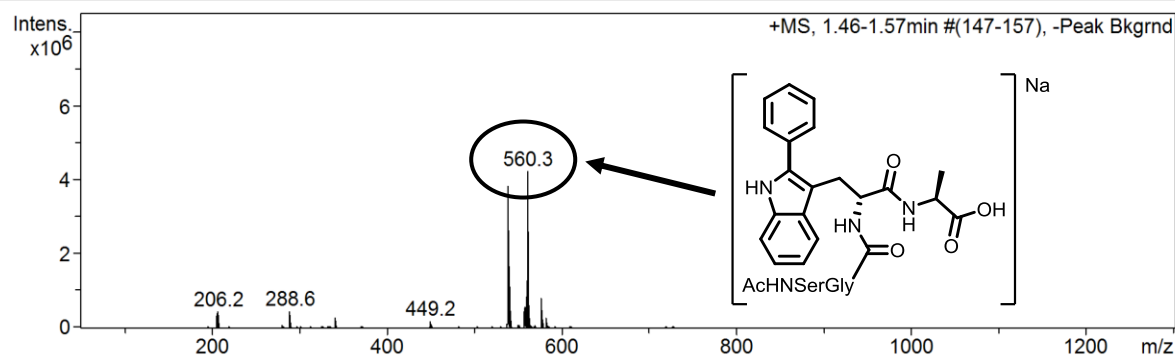

HPLC-ESI-MS chromatogram (BPC) of the crude reaction material from **Method B** (arylated tryptophan donated Trp\*, starting material donated Trp).

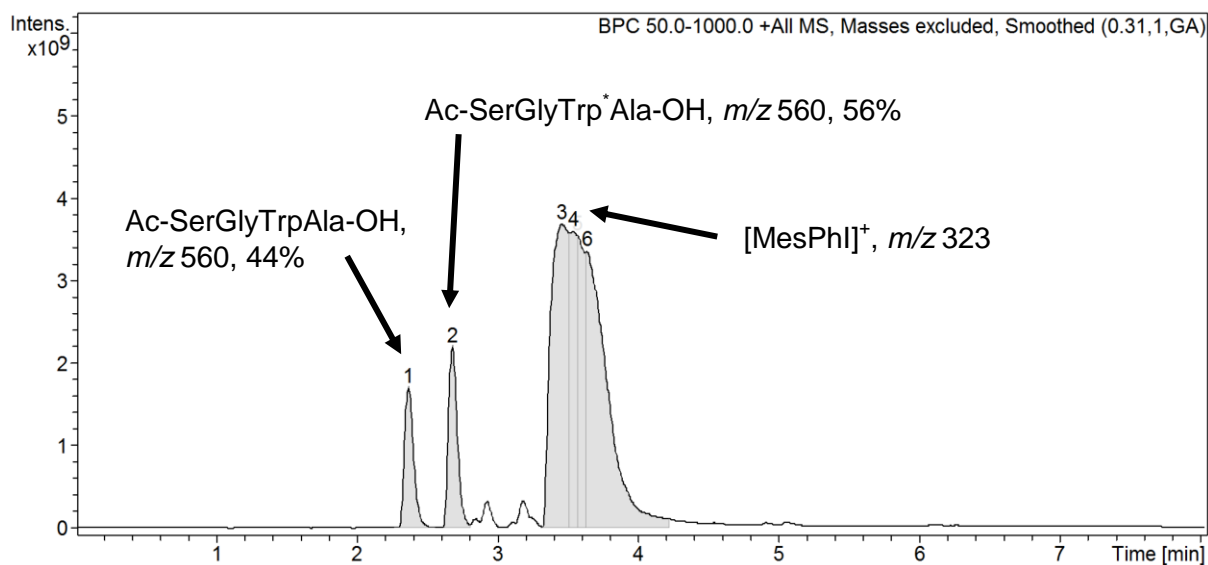

ESI-MS of the crude reaction material.

Cmpd 1, 2.4 min

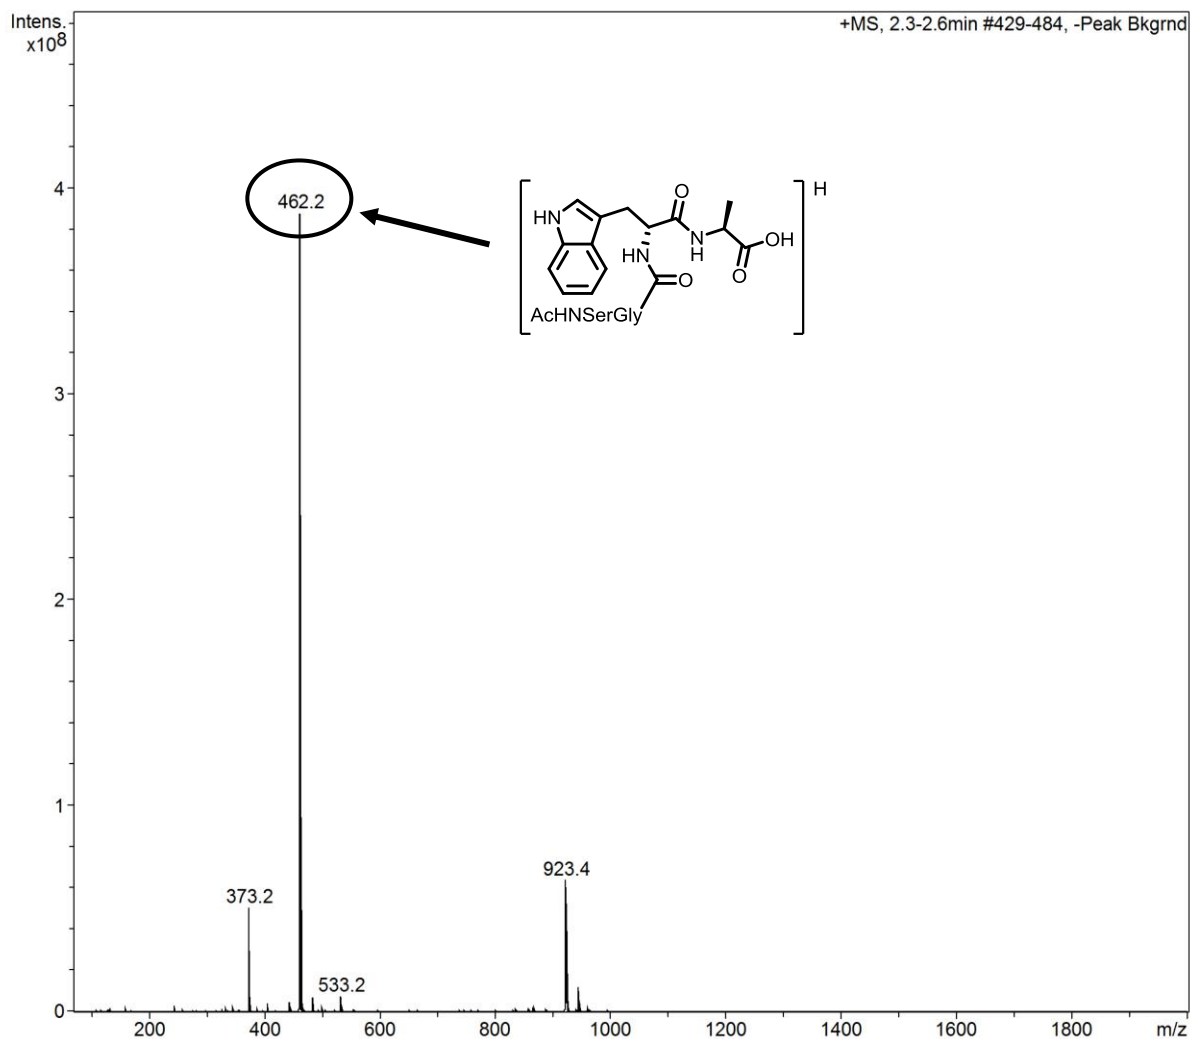



Cmpd 2, 2.7 min

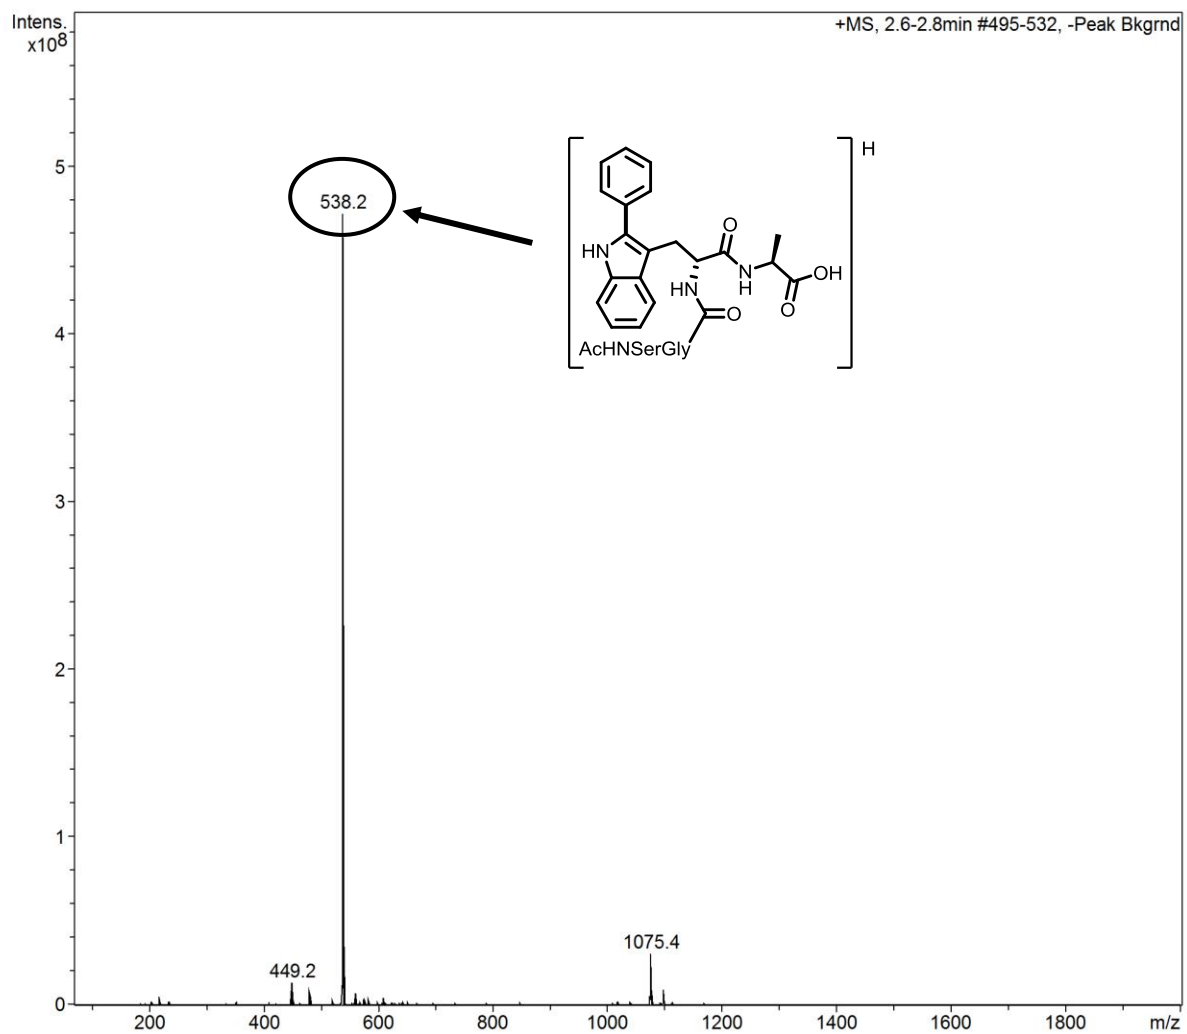

Cmpd 3, 3.5 min

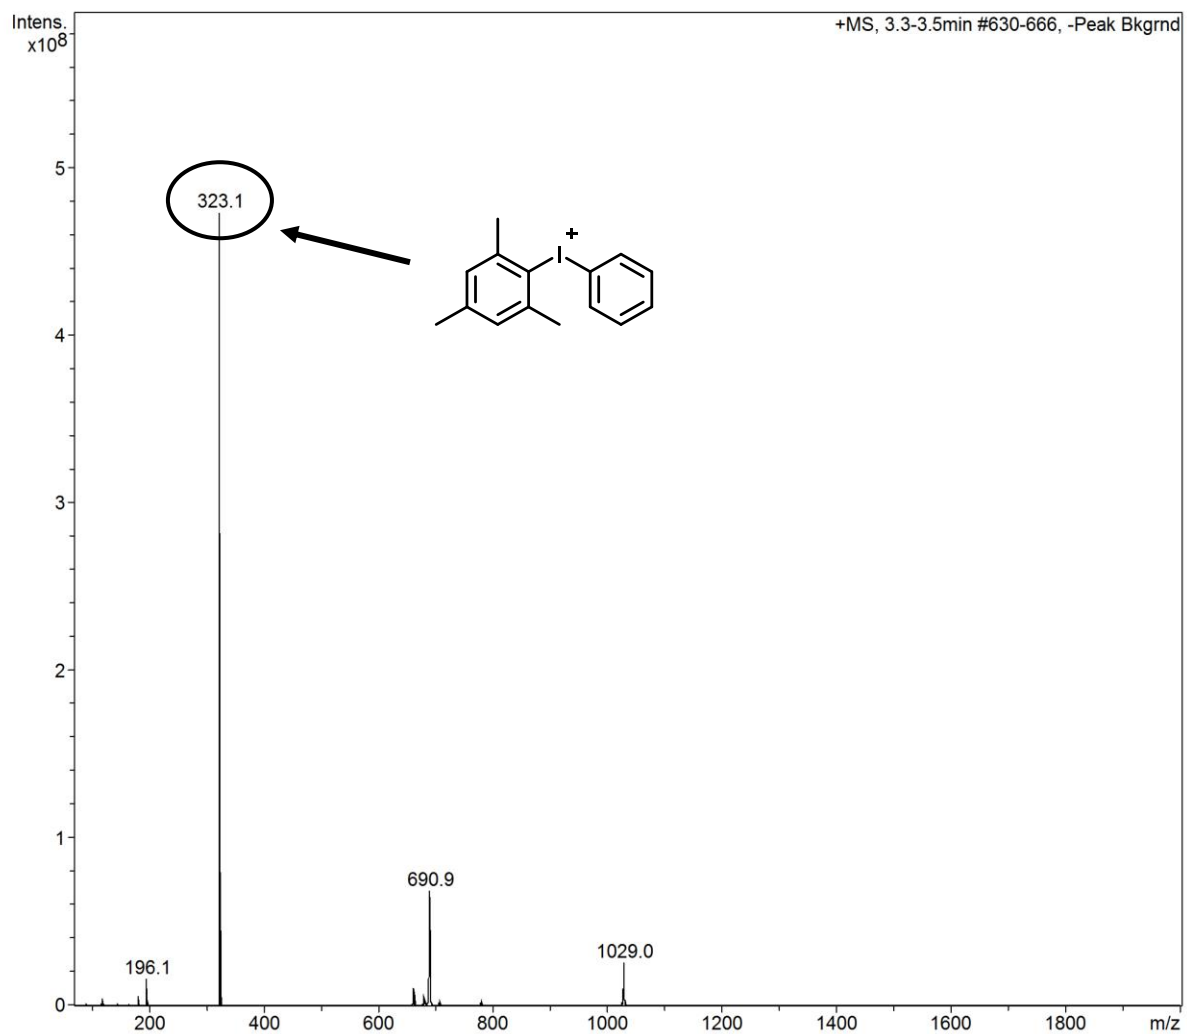

## 2. UV-Visible Spectroscopic Data

UV-visible spectroscopic analysis of **12b** (concentration range in legend, mol dm<sup>-3</sup>)

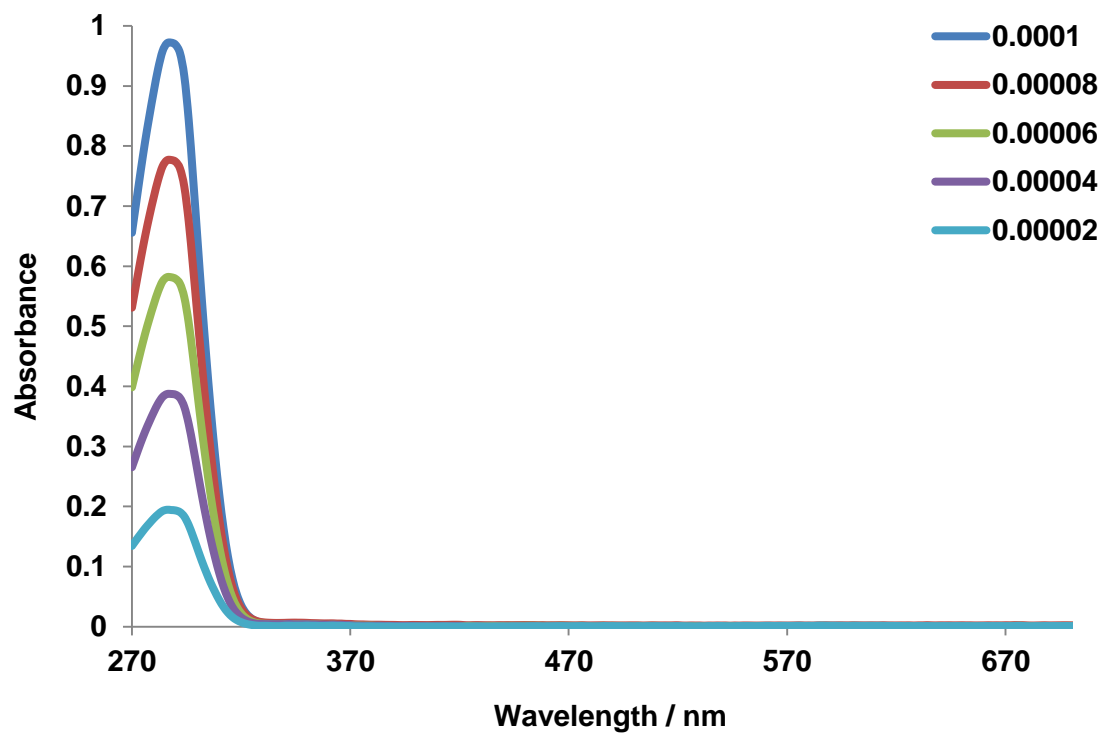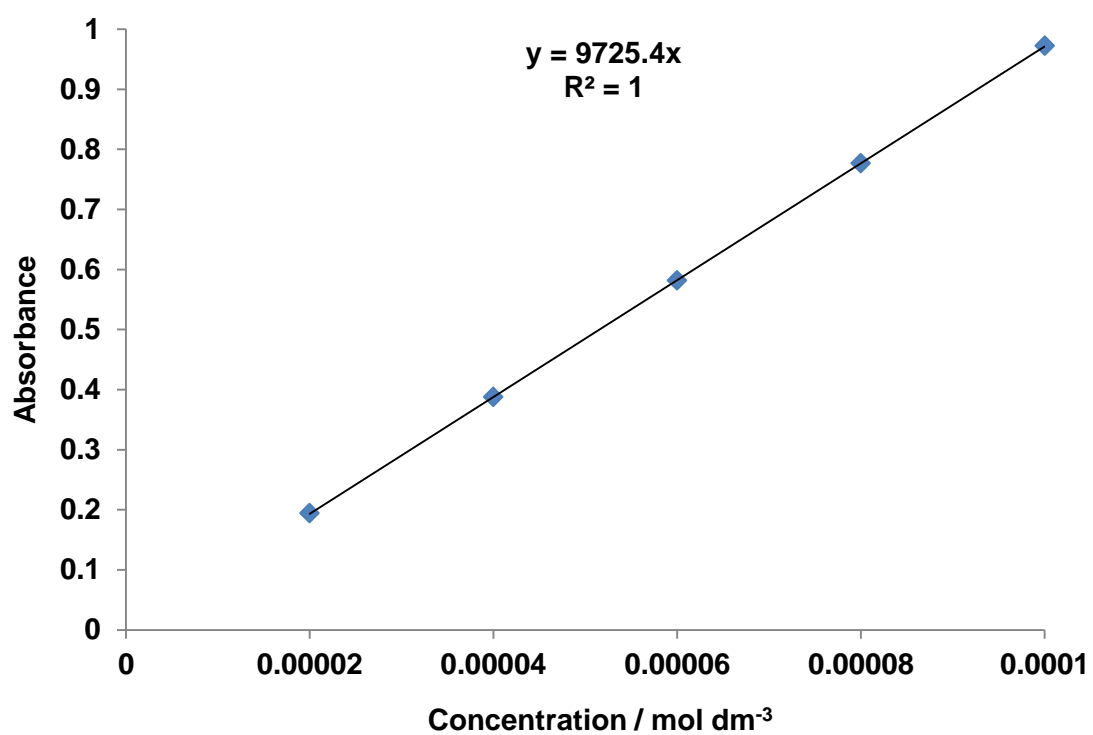

UV-visible spectroscopic analysis of **13** (concentration range in legend, mol dm<sup>-3</sup>)

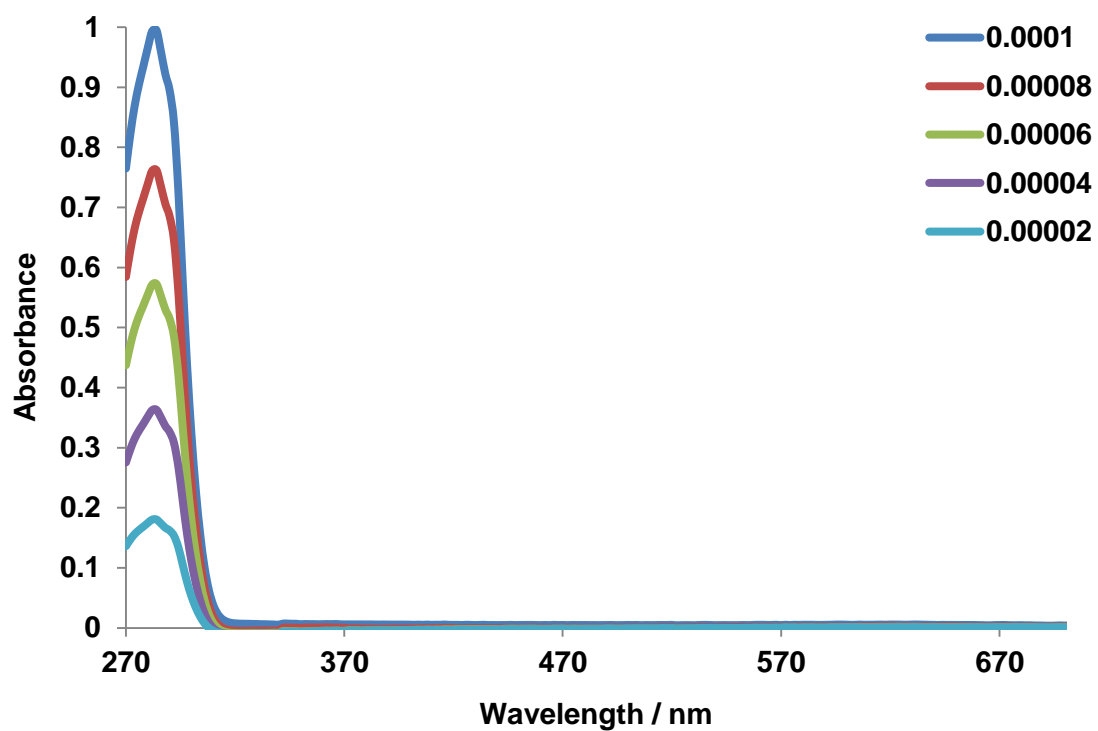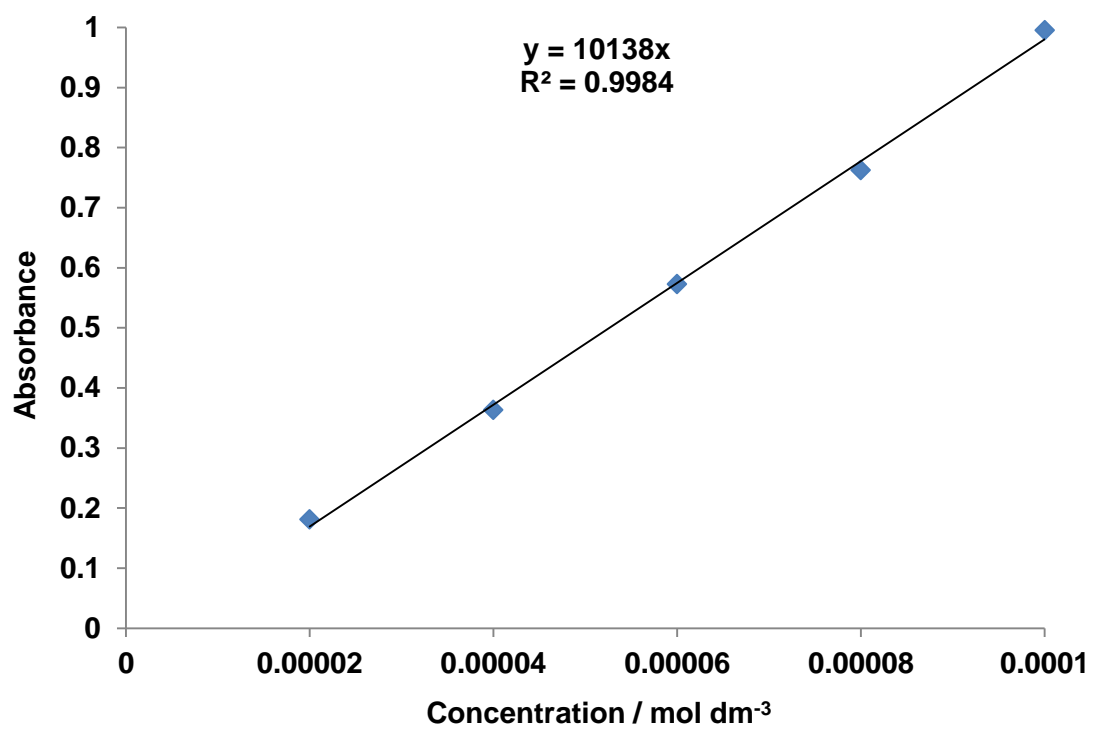

UV-visible spectroscopic analysis of **14a** (concentration range in legend, mol dm<sup>-3</sup>)

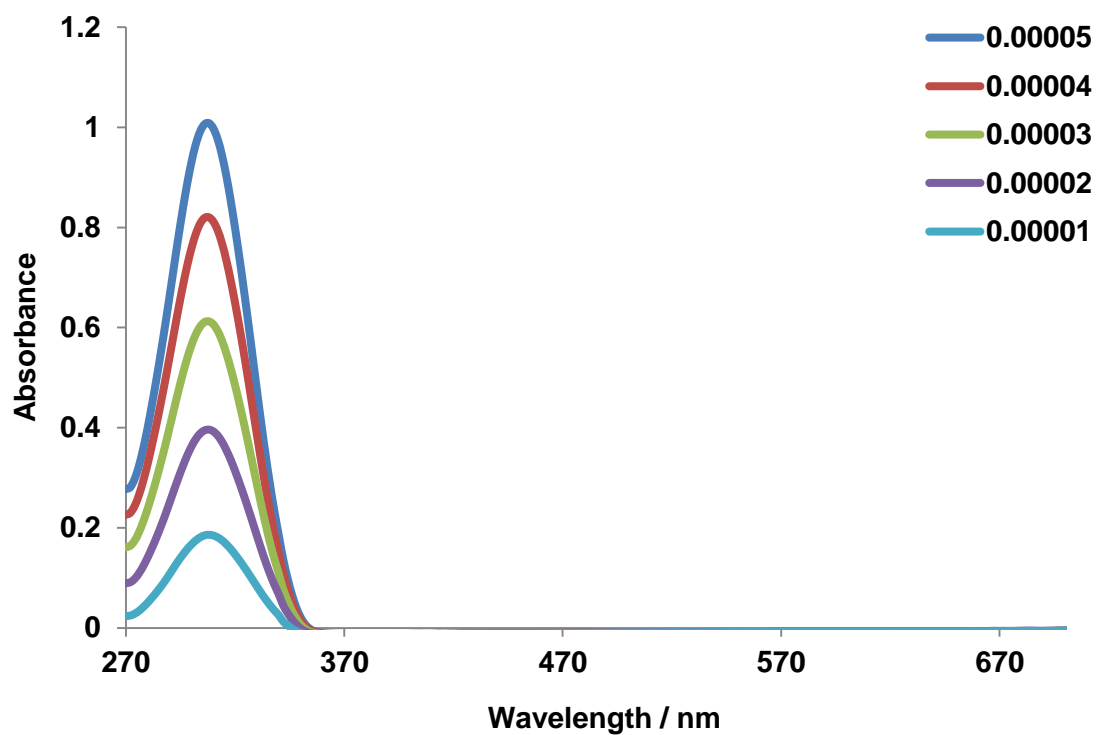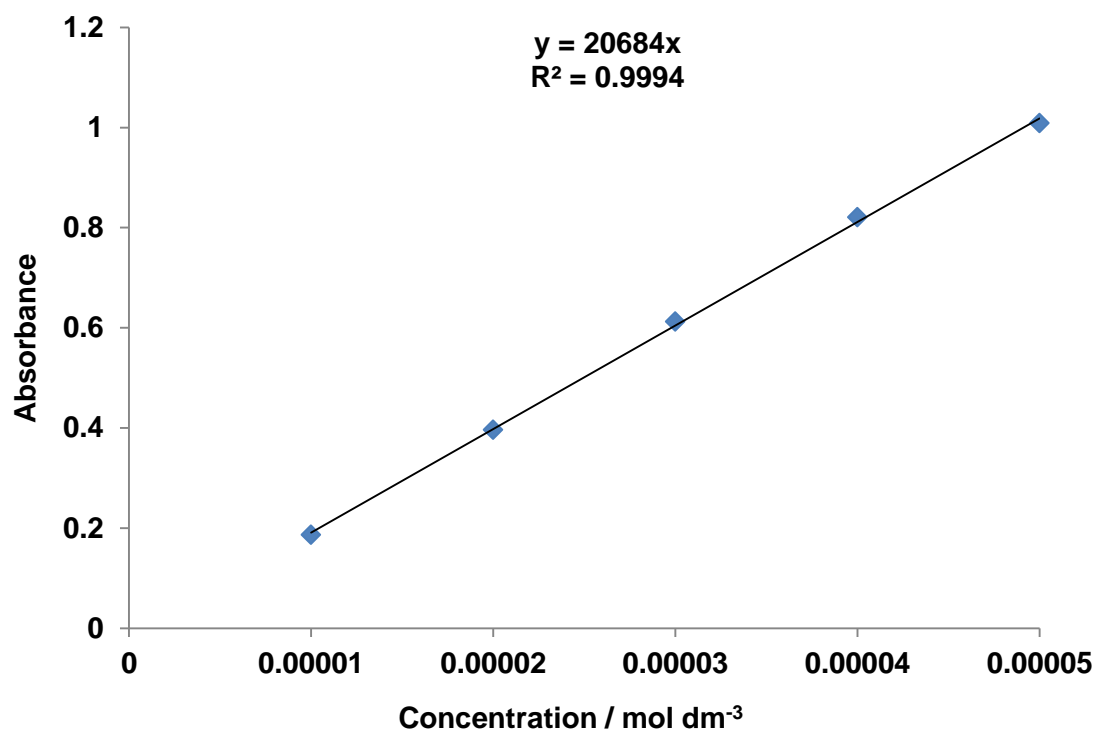

UV-visible spectroscopic analysis of **14b** (concentration range in legend, mol dm<sup>-3</sup>)

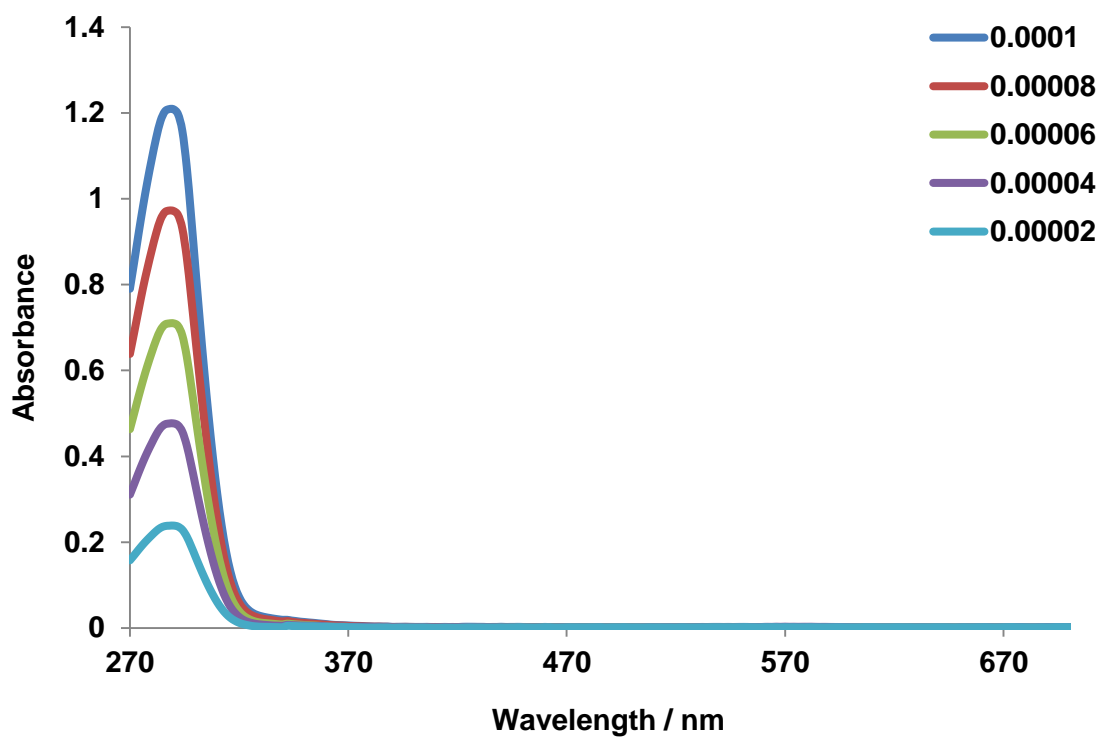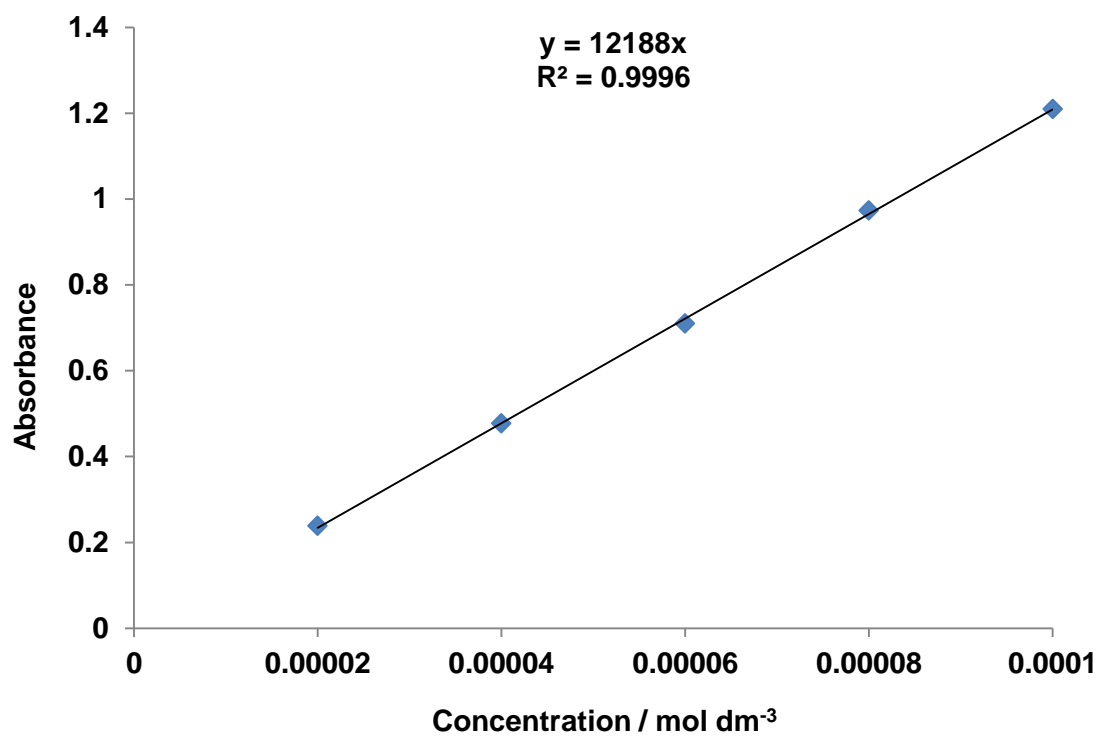

UV-visible spectroscopic analysis of **15** (concentration range in legend, mol dm<sup>-3</sup>)

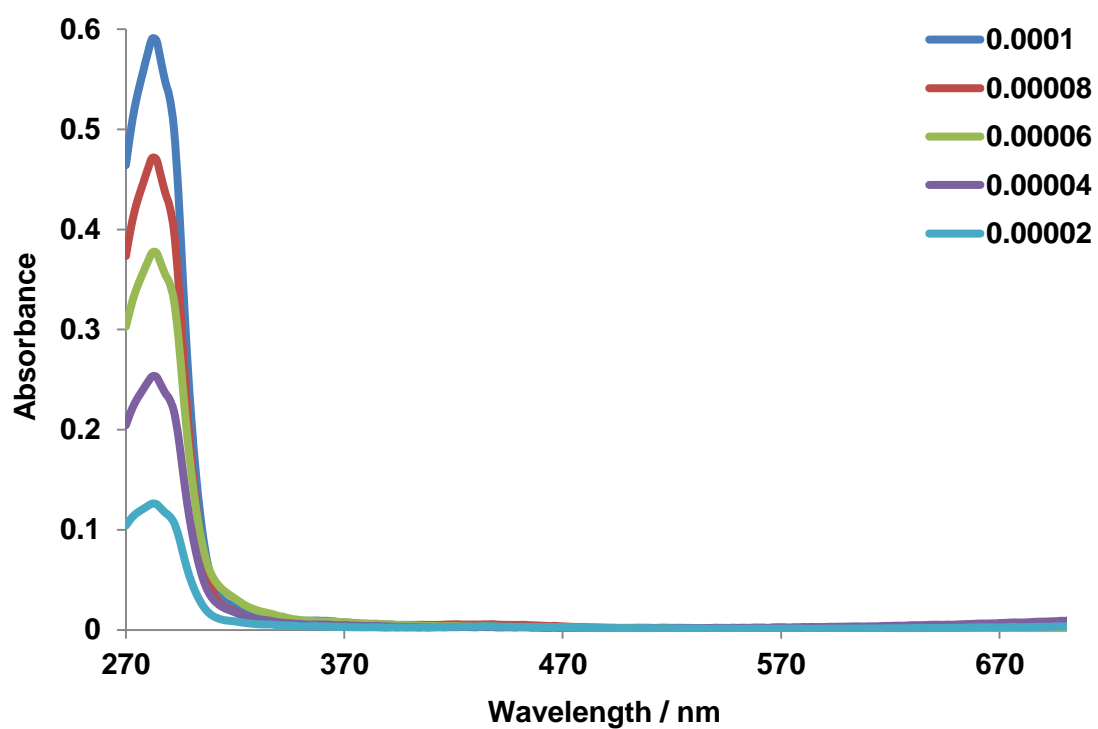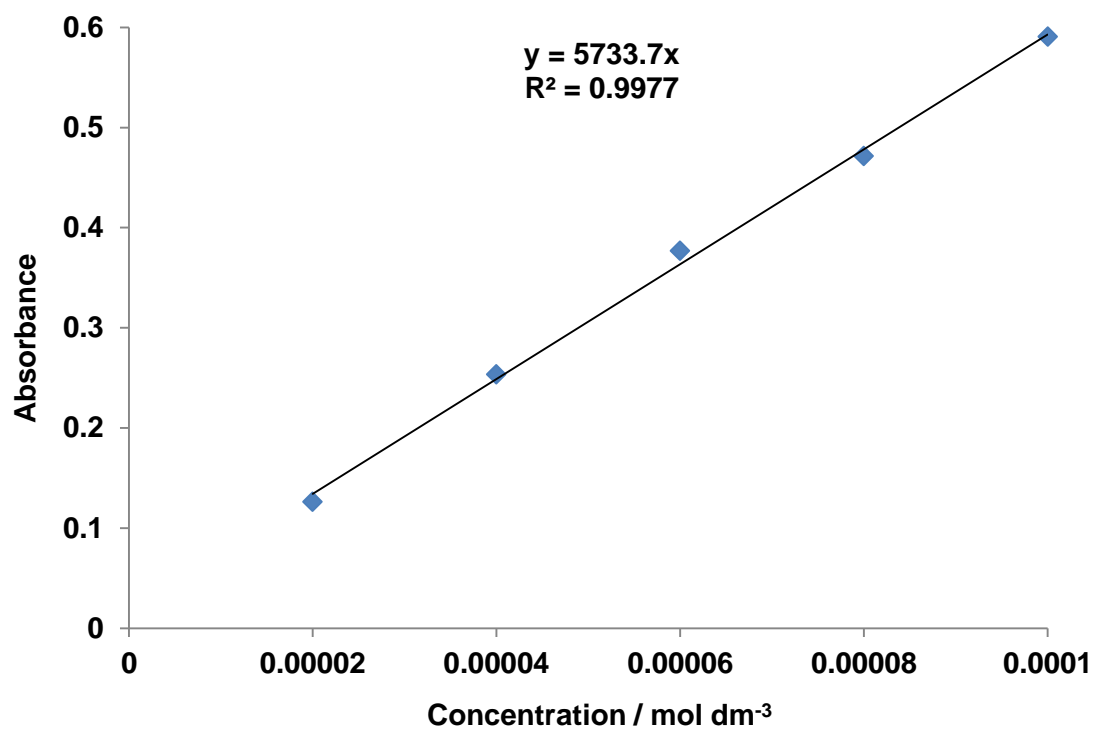

UV-visible spectroscopic analysis of **16a** (concentration range in legend, mol dm<sup>-3</sup>)

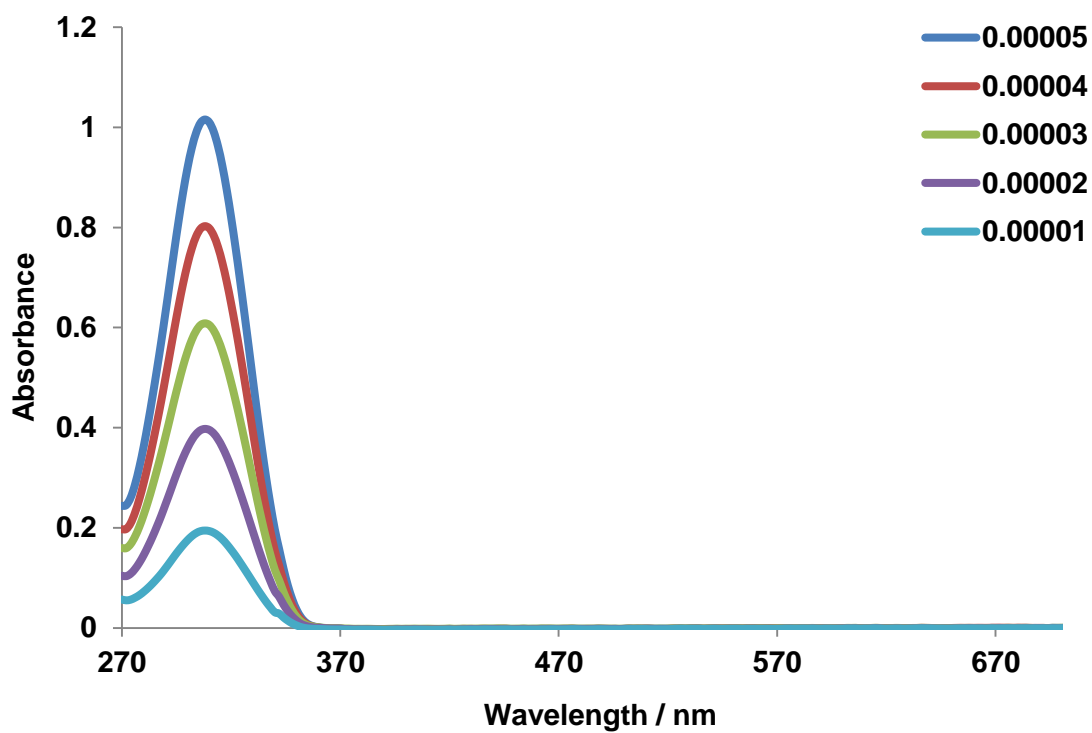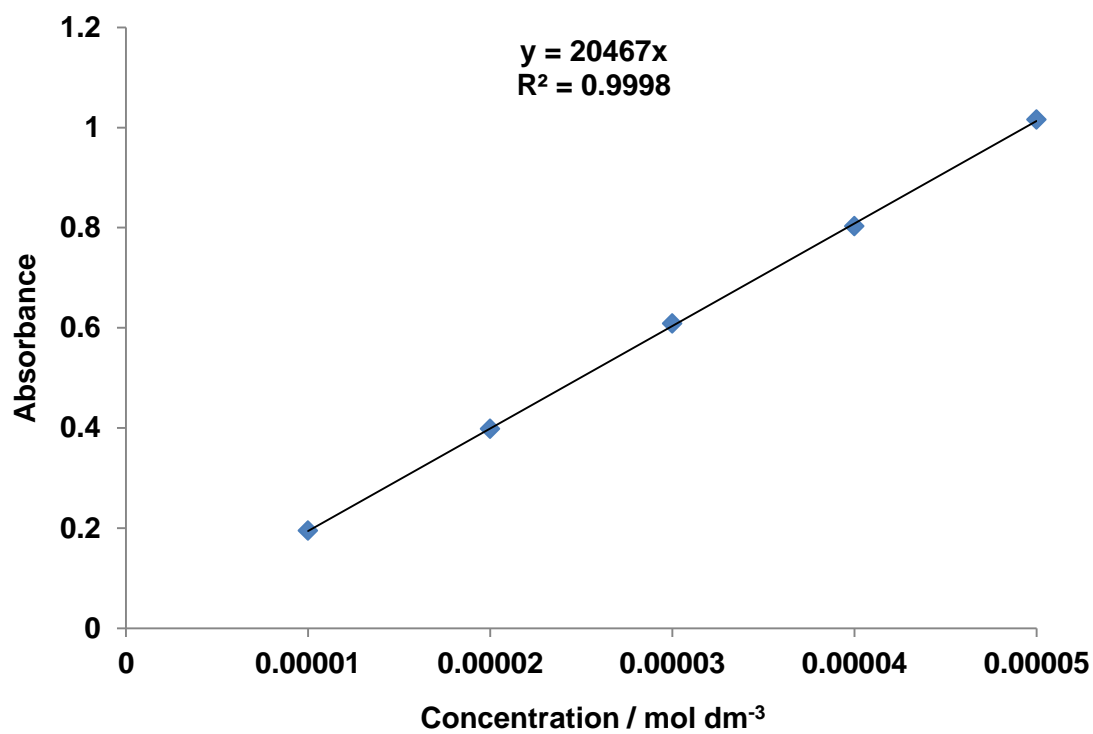



UV-visible spectroscopic analysis of **16b** (concentration range in legend, mol dm<sup>-3</sup>)

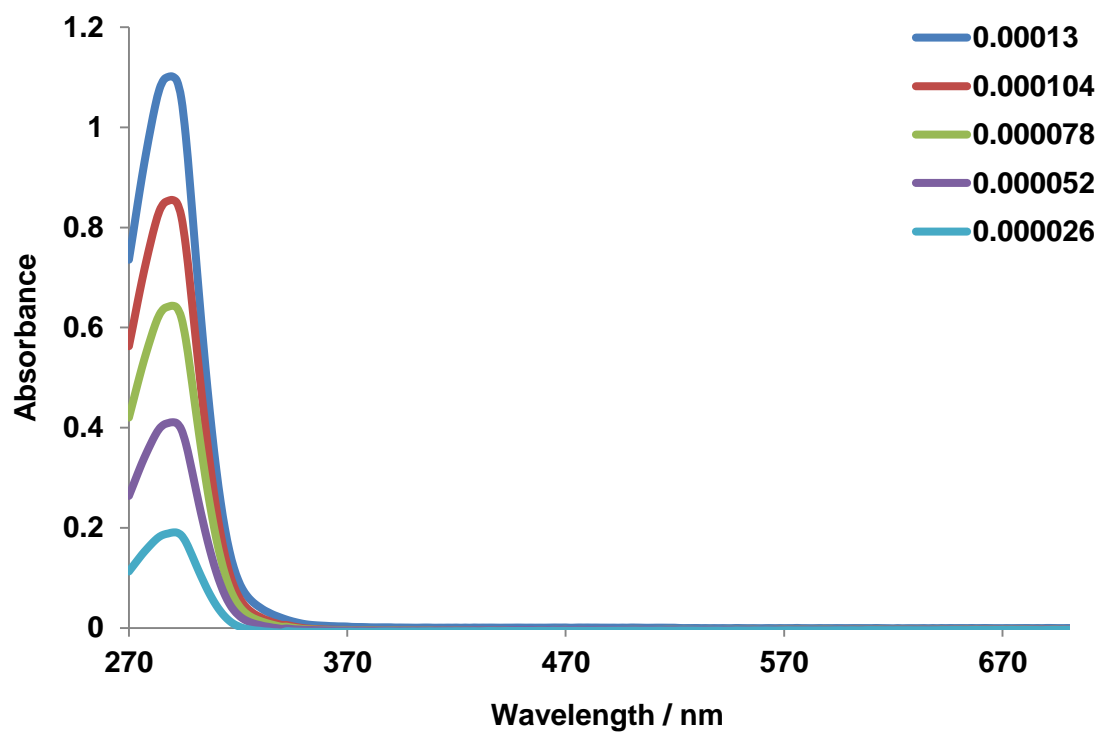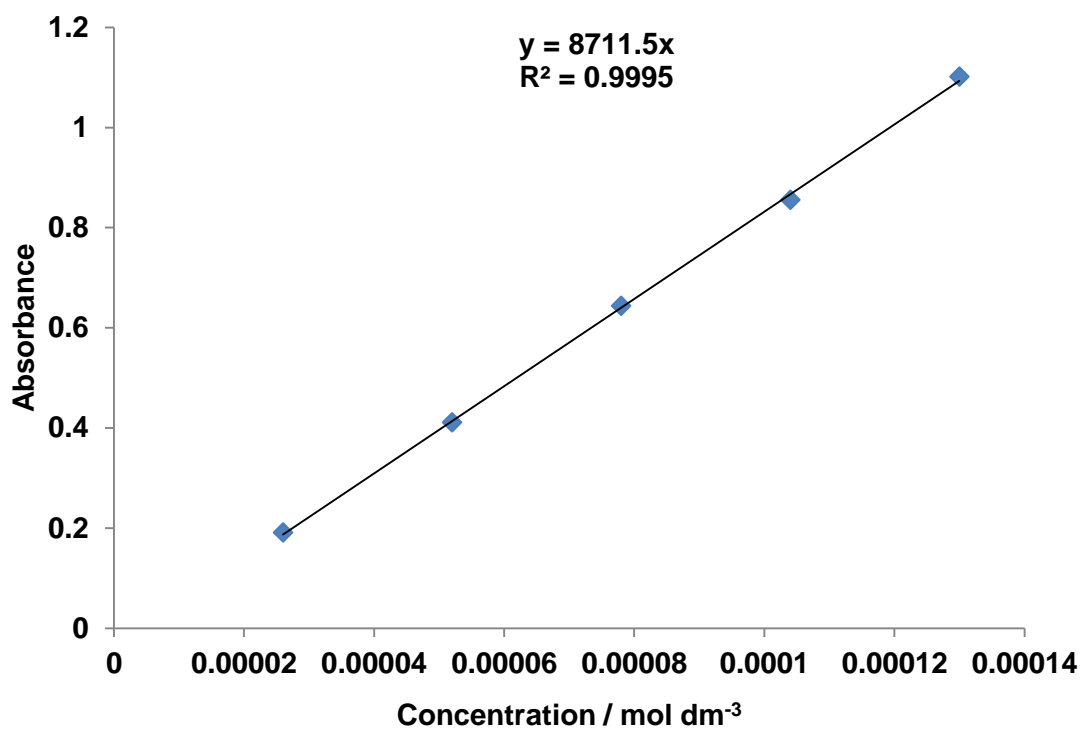

### 3. NMR spectroscopic data

NMR spectra for compounds **2b**, **2e**, **3**, **4** and 2-Acetamidoacetic acid are given in our preliminary communication on this work.<sup>1</sup>

# Methyl (2S)-2-amino-3-(1H-indol-3-yl)propanoate hydrochloride

Filename: c9727ajr  
Reference: Alan ReayAJR-5-395

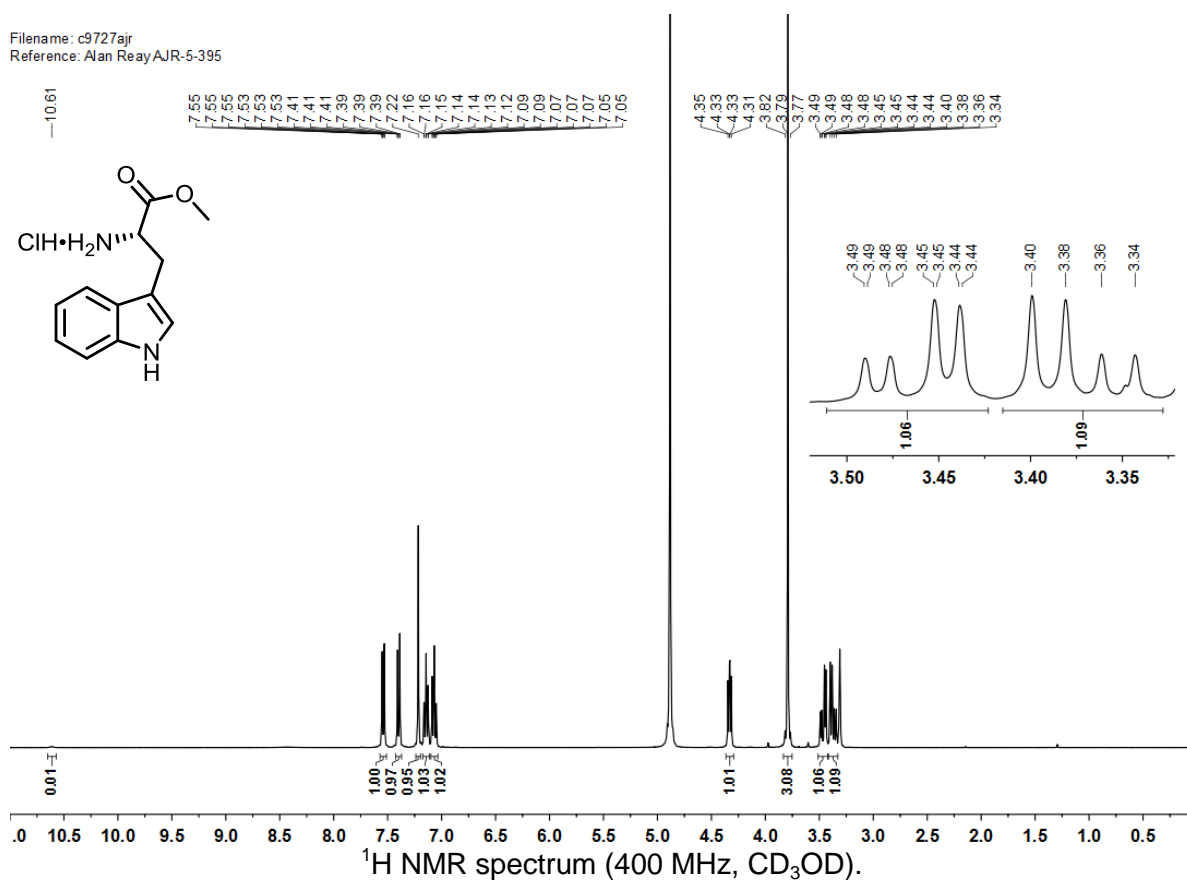

Filename: c9727ajr  
Reference: Alan ReayAJR-5-395

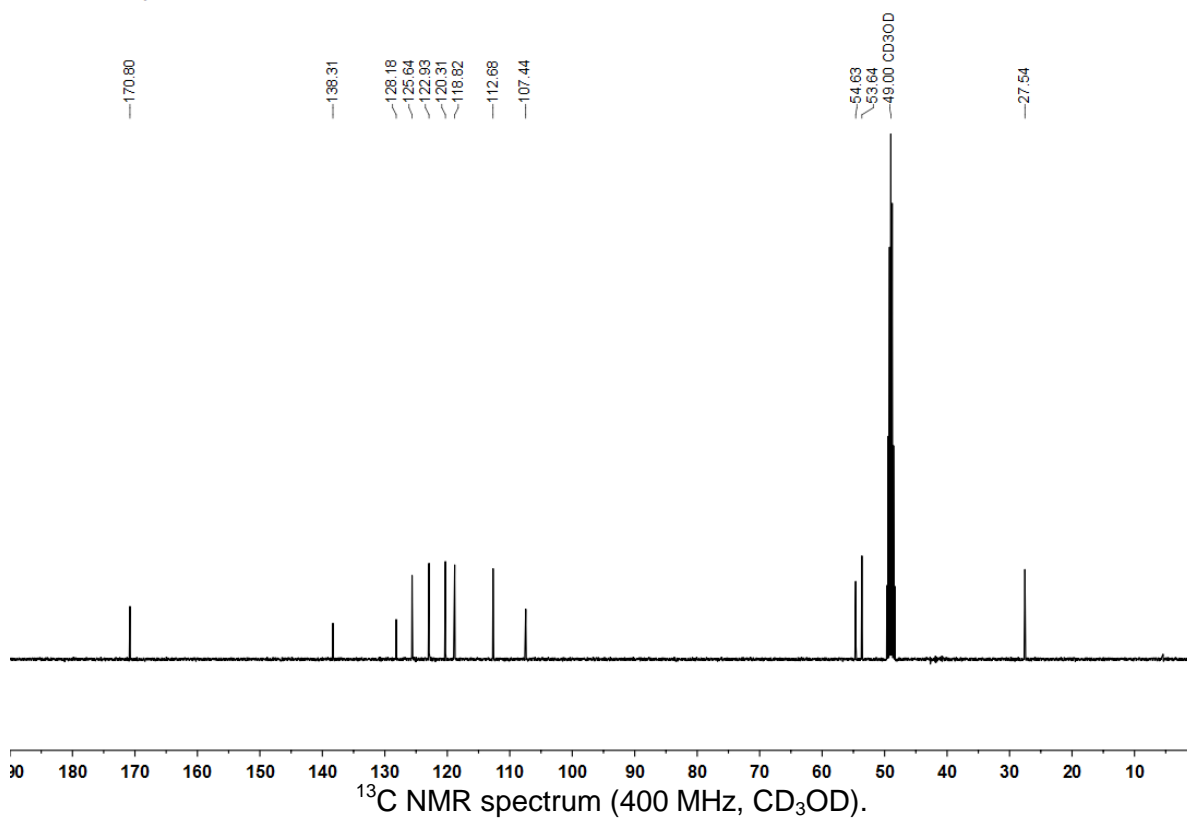

# Methyl (2S)-2-acetamido-3-(1H-indol-3-yl)propanoate, **1a**

Filename: n0922ajr  
Reference: Alan ReayAJR-5-396

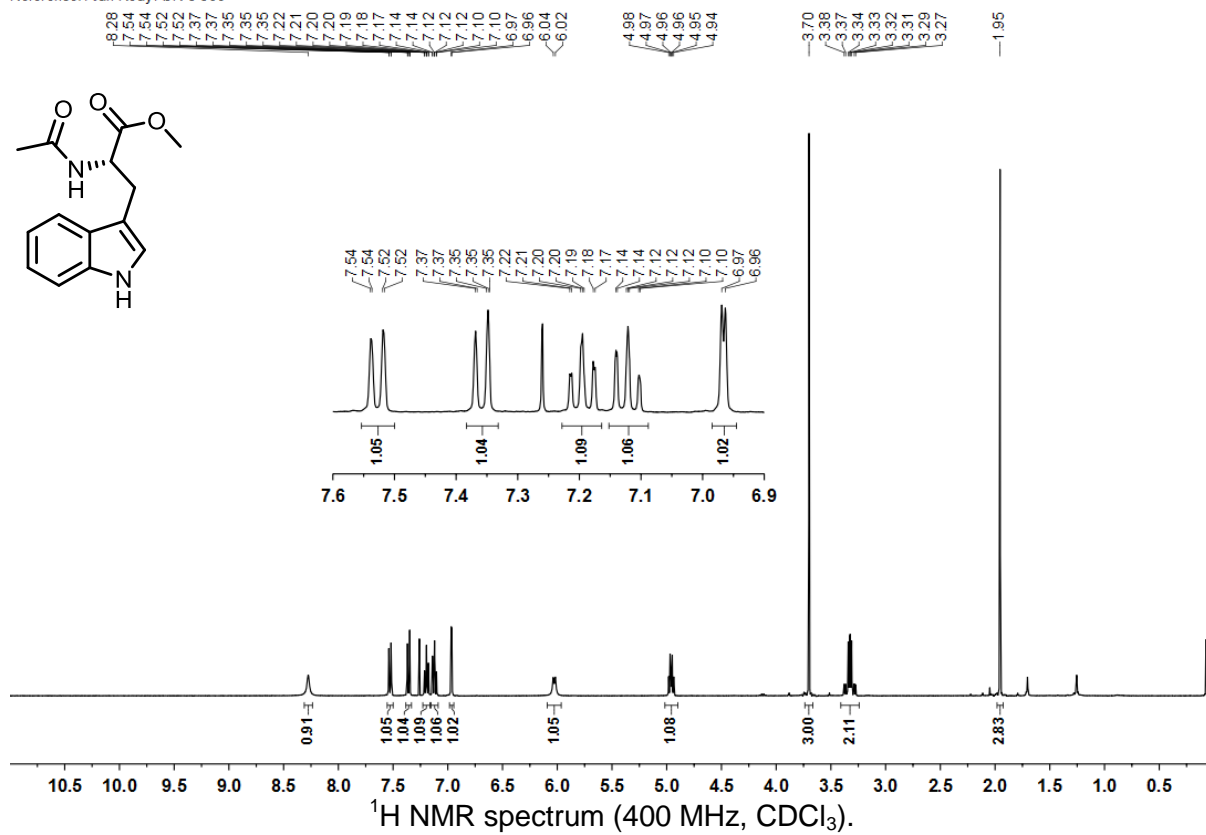

Filename: j7799ajr  
Reference: Alan ReayAJR-1-77 sm

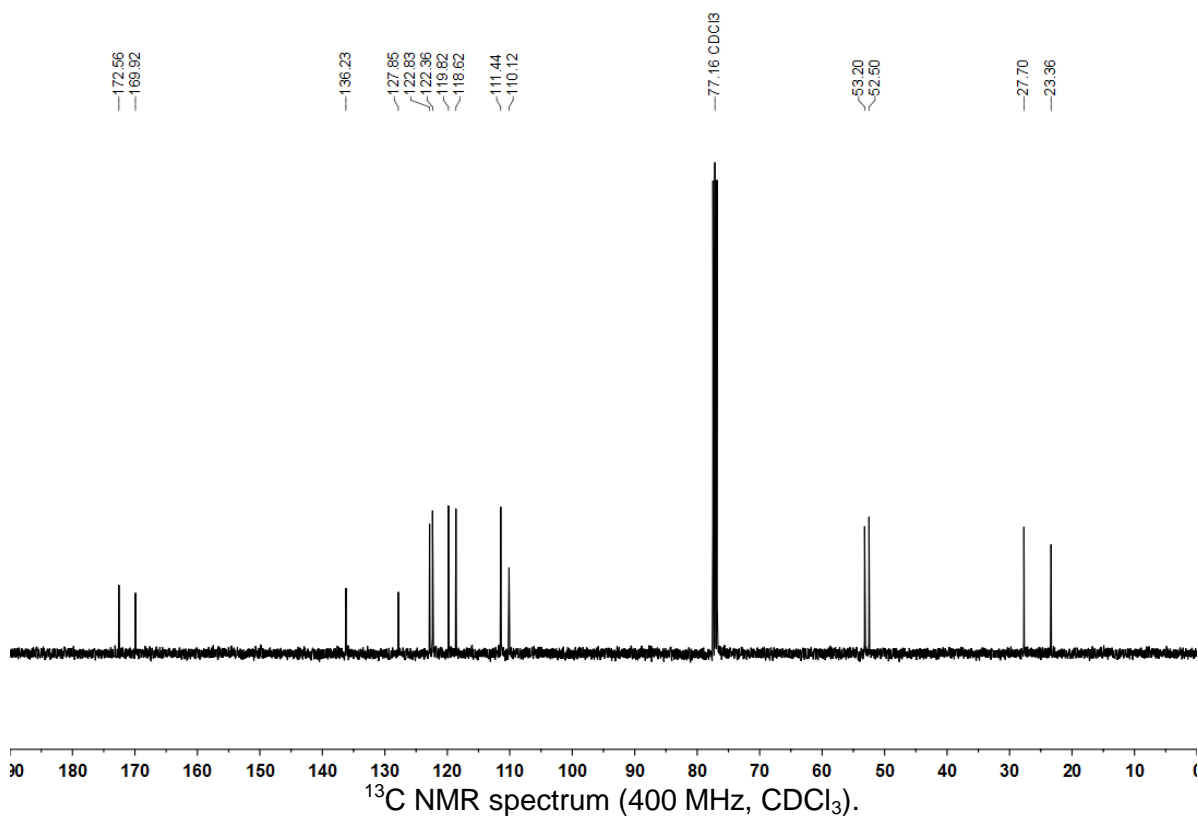

# Methyl (2S)-2-[(*tert*-butoxy)carbonyl]amino}-3-(1*H*-indol-3-yl)propanoate, **1b**

Filename: m8001ajr  
Reference: Alan ReayAJR-4-337

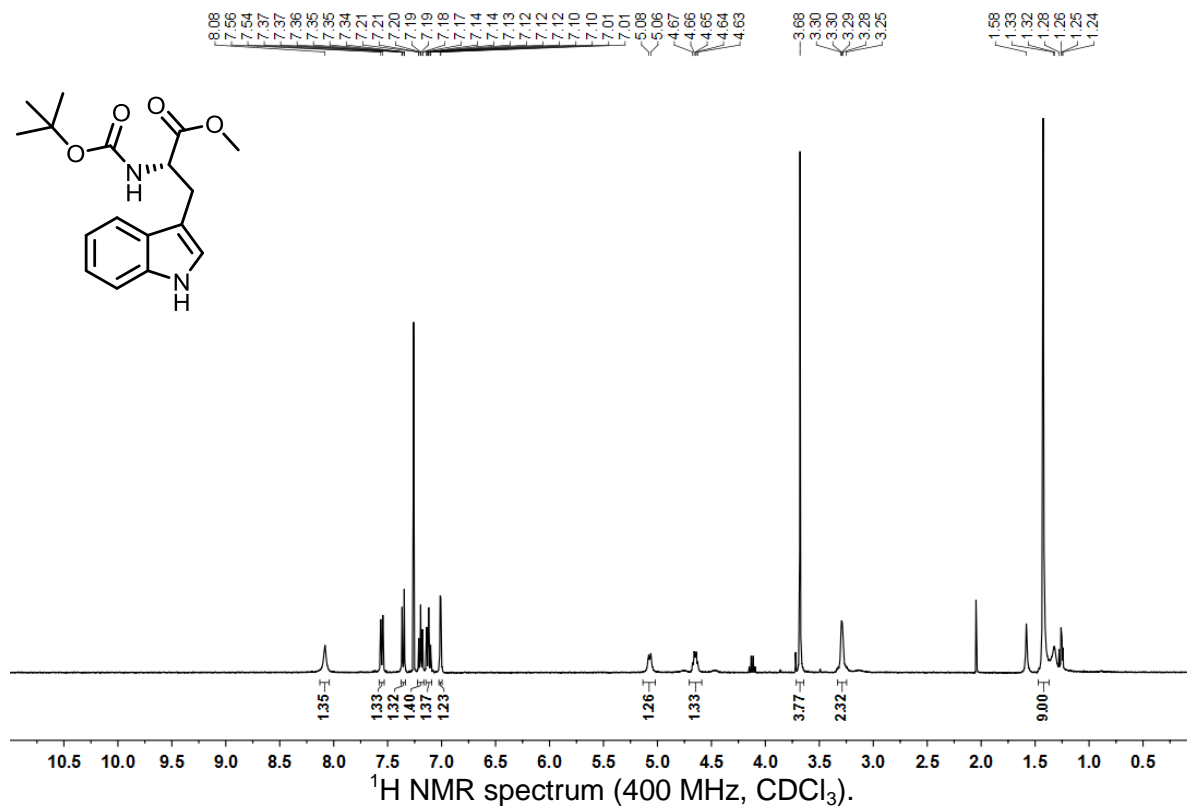

Filename: d0157ajr  
Reference: Alan ReayAJR-5-423

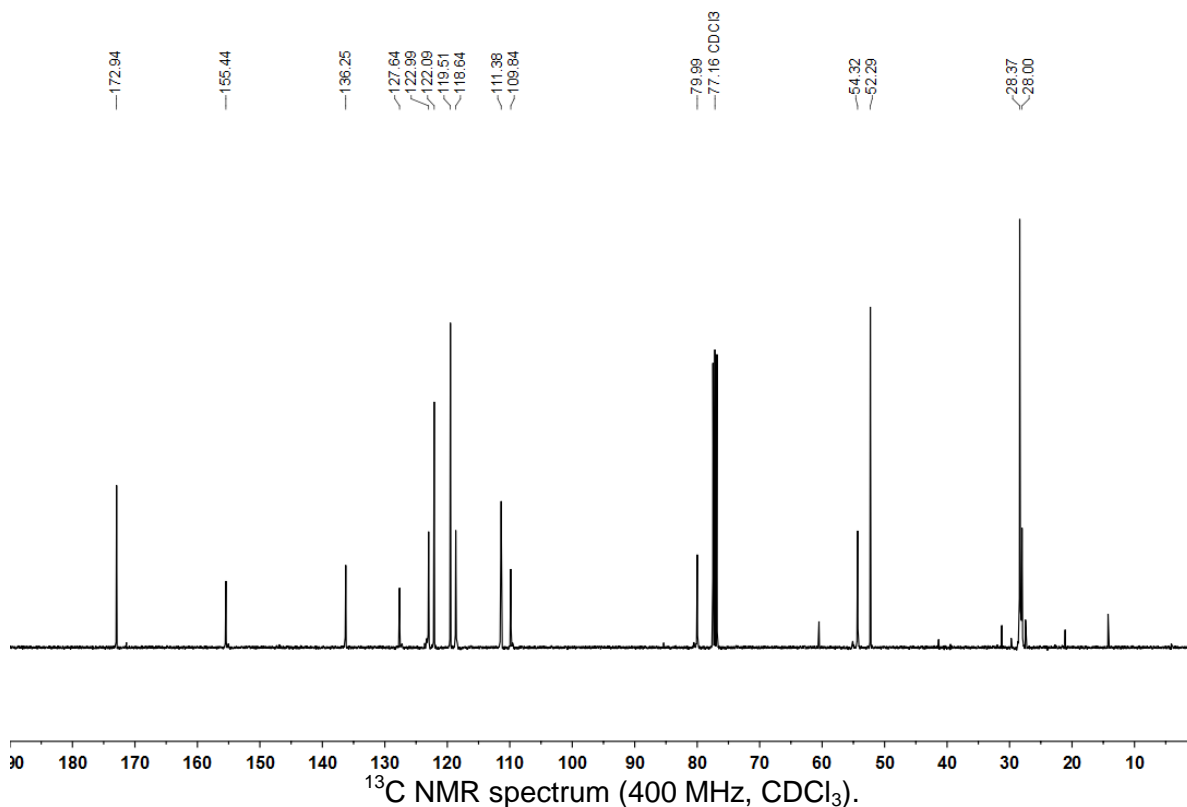

Methyl (2S)-3-(1H-indol-3-yl)-2-(trifluoroacetamido)propanoate, **1c**

Filename: c4796ajr  
Reference: Alan ReayAJR-4-343

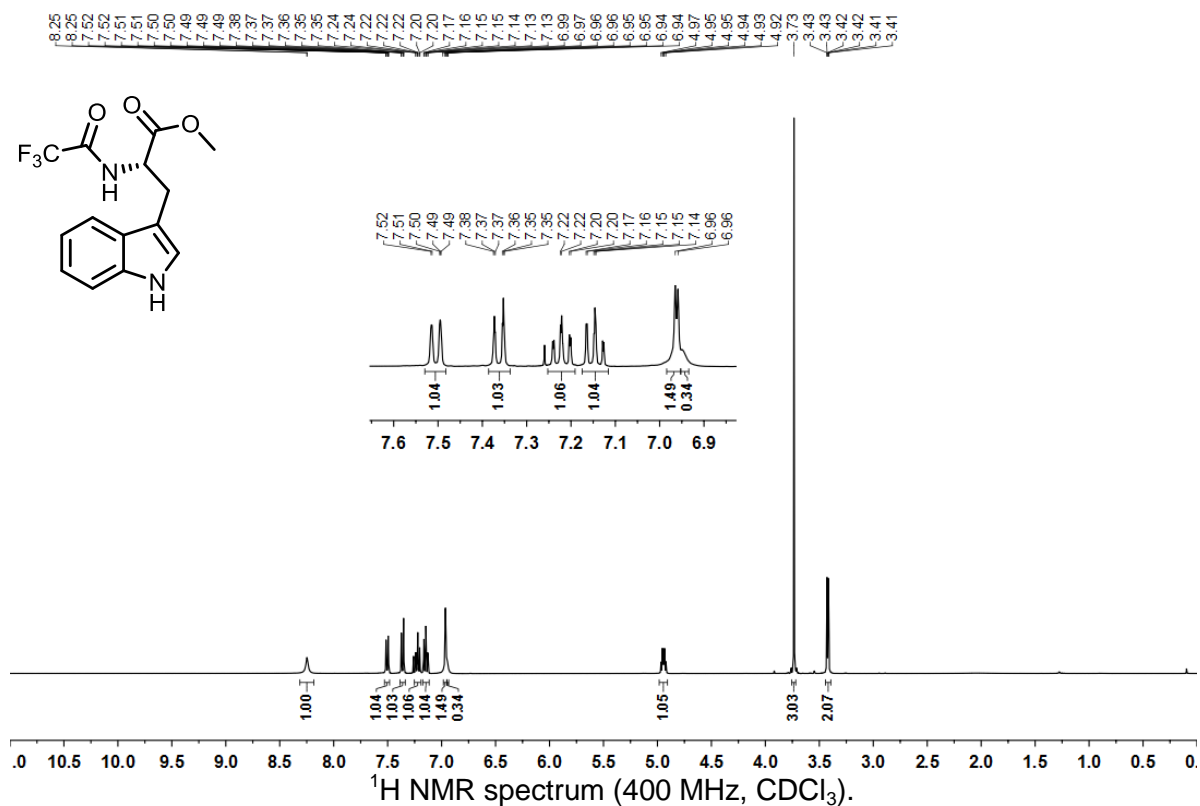

Filename: c4803ajr  
Reference: Alan ReayAJR-4-343

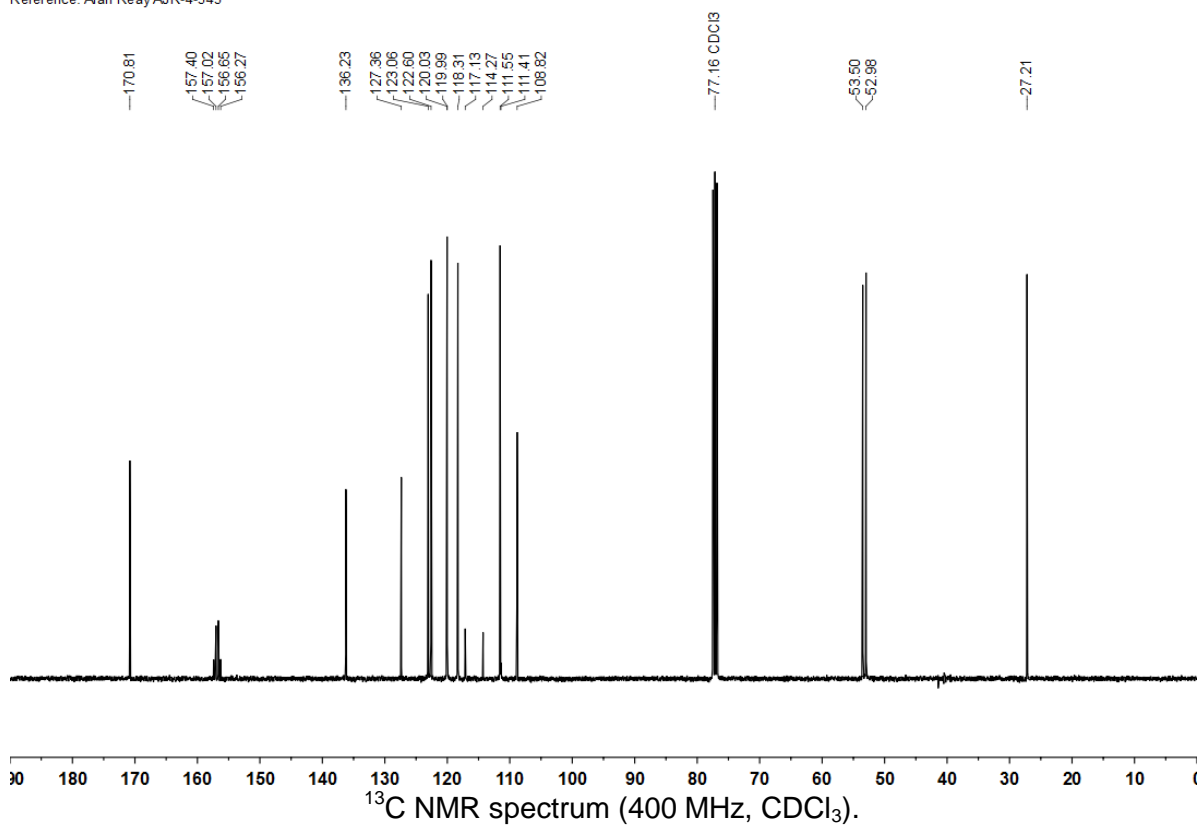

Filename: m8578ajr  
Reference: Alan Reay AJR-4-343

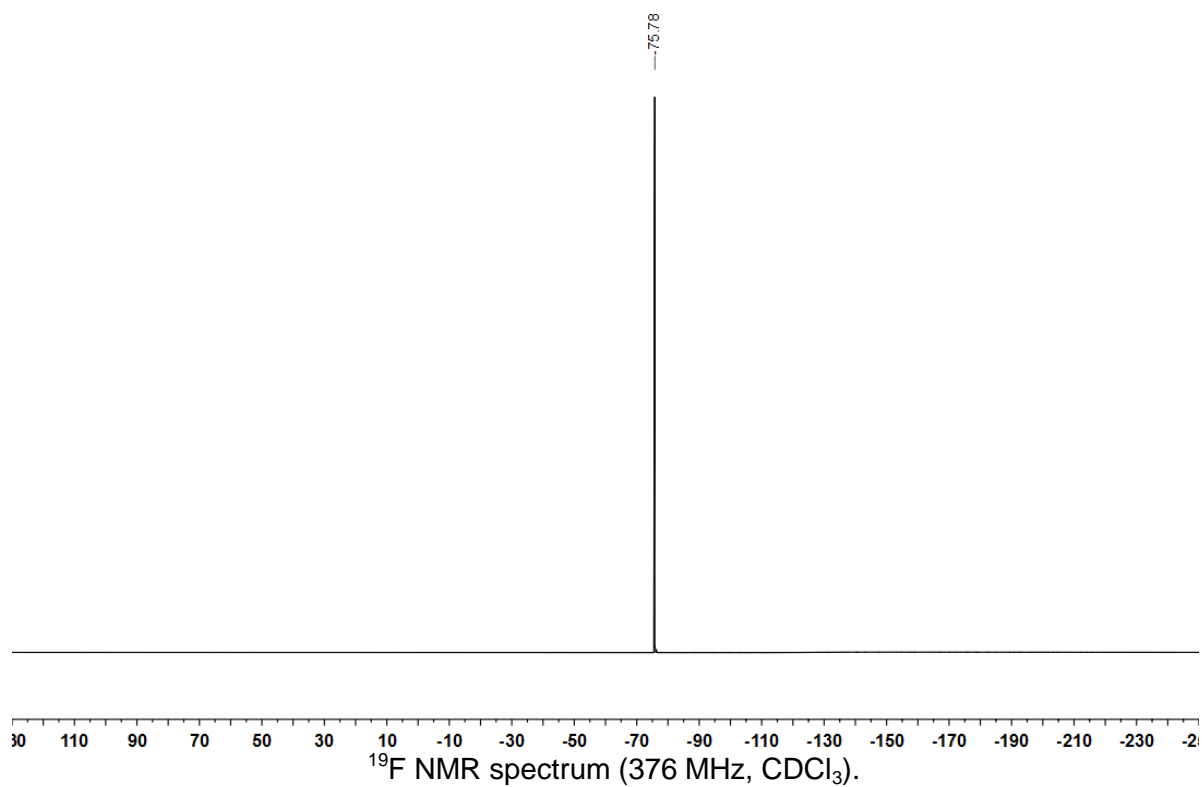

# Methyl (2S)-2-acetamido-3-(2-phenyl-1H-indol-3-yl)propanoate, **2a**

Filename: d0156ajr  
Reference: Alan ReayAJR-4-365

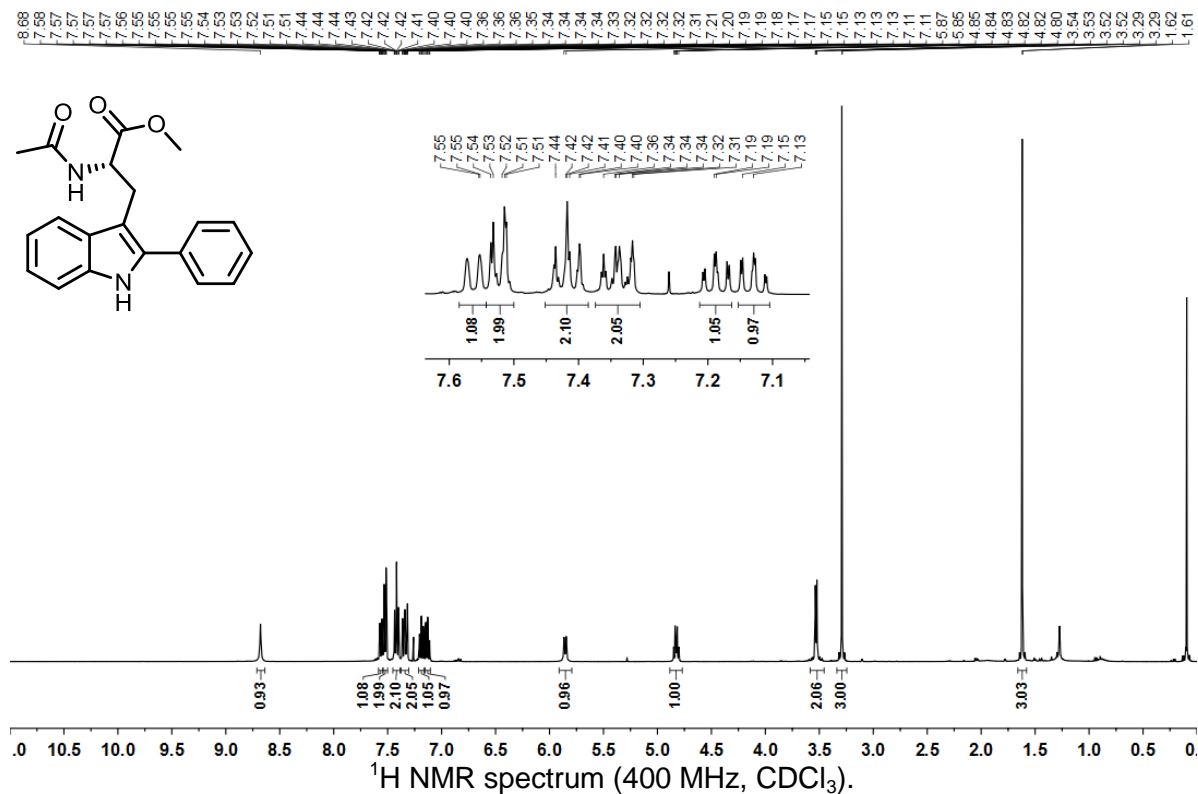

Filename: d0156ajr  
Reference: Alan ReayAJR-4-365

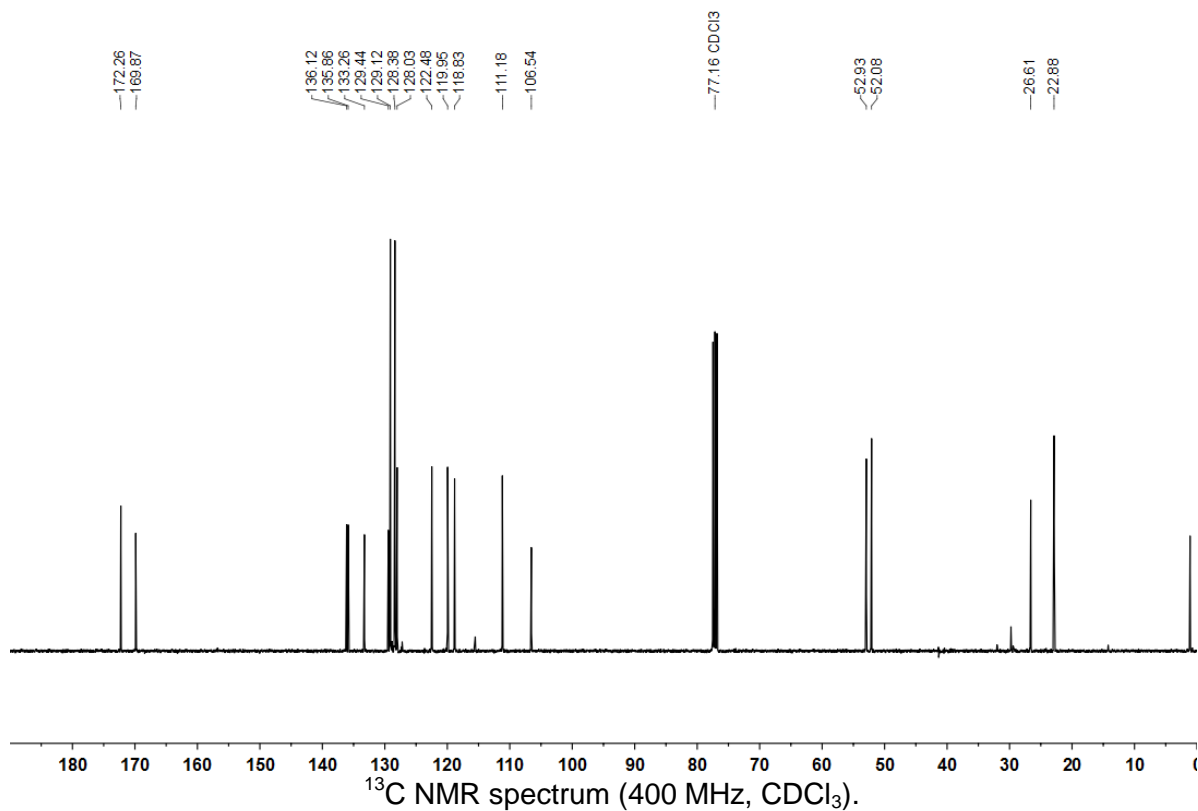



# Methyl (2S)-2-acetamido-3-[2-(4-methoxyphenyl)-1H-indol-3-yl]propanoate, **2c**

Filename: d0742ajr  
Reference: Alan ReayAJR-5-410

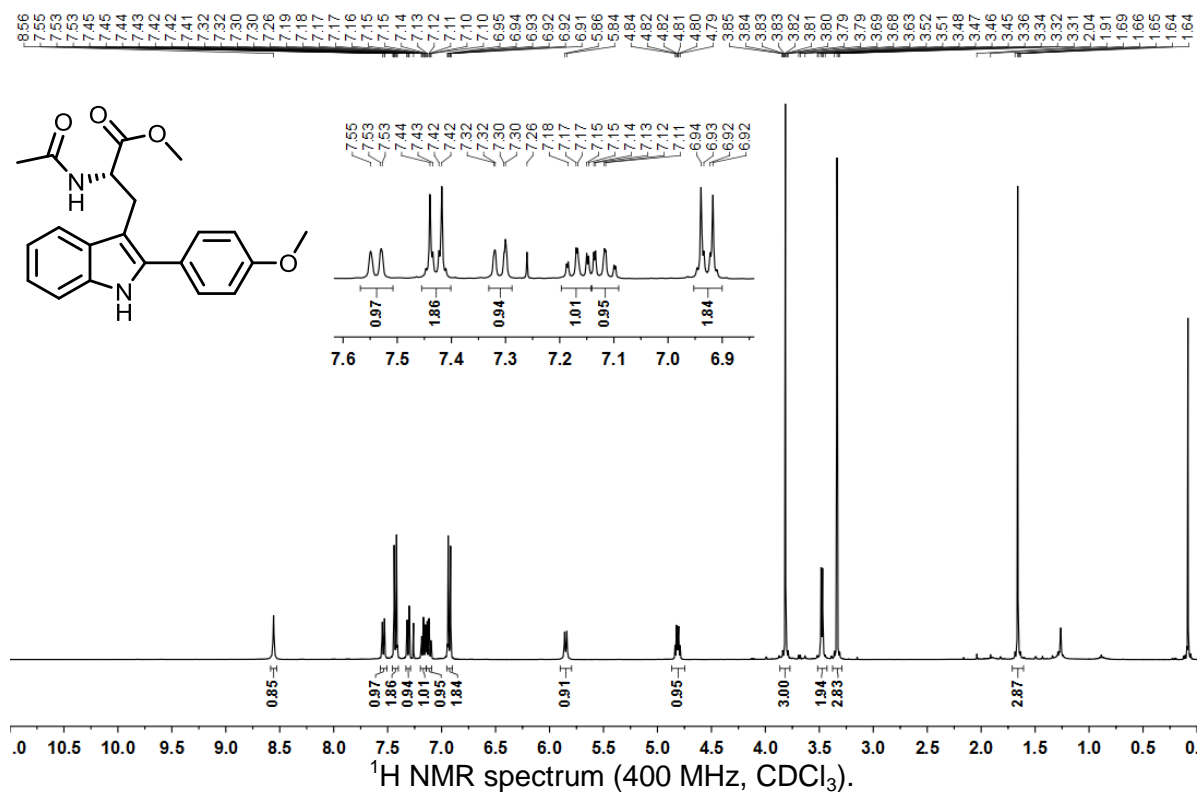

Filename: d0742ajr  
Reference: Alan ReayAJR-5-410

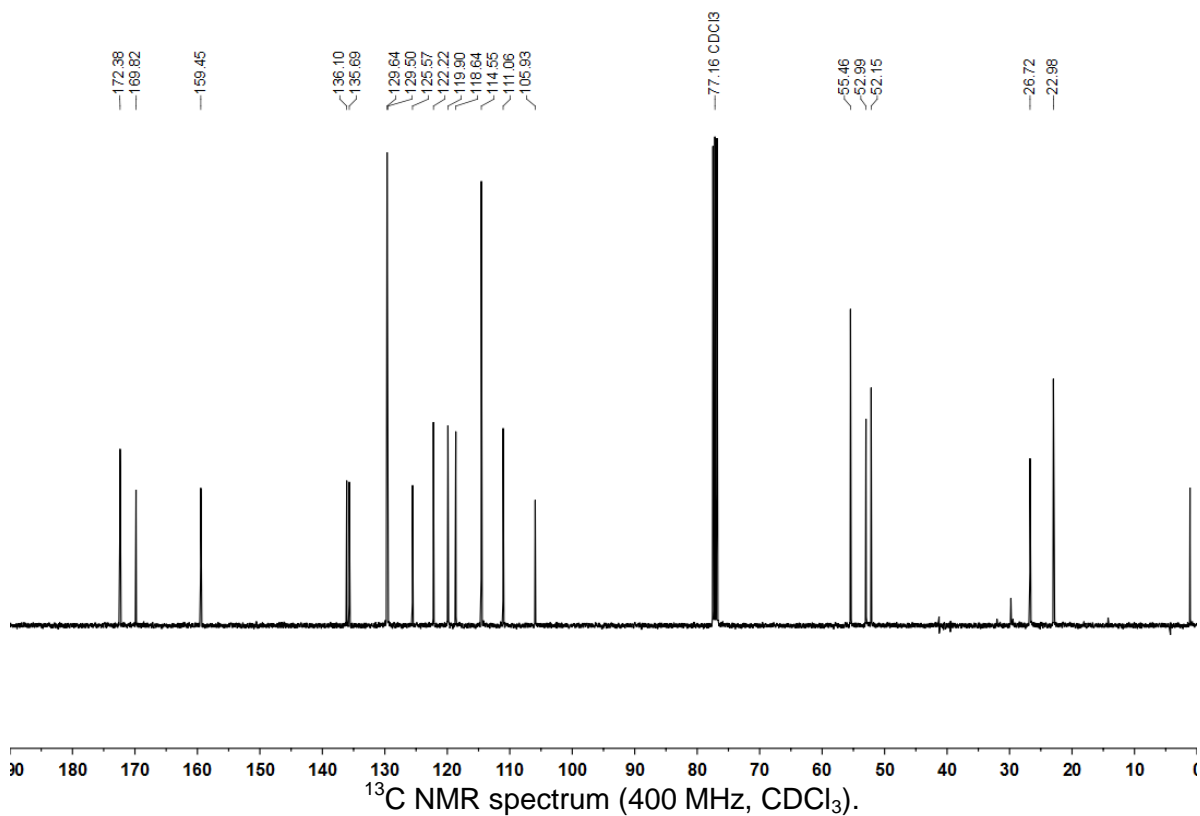

# Methyl (2S)-3-[2-(4-fluorophenyl)-1H-indol-3-yl]-2-acetamidopropanoate, **2d**

Filename: d0368ajr  
Reference: Alan ReayAJR-5-417

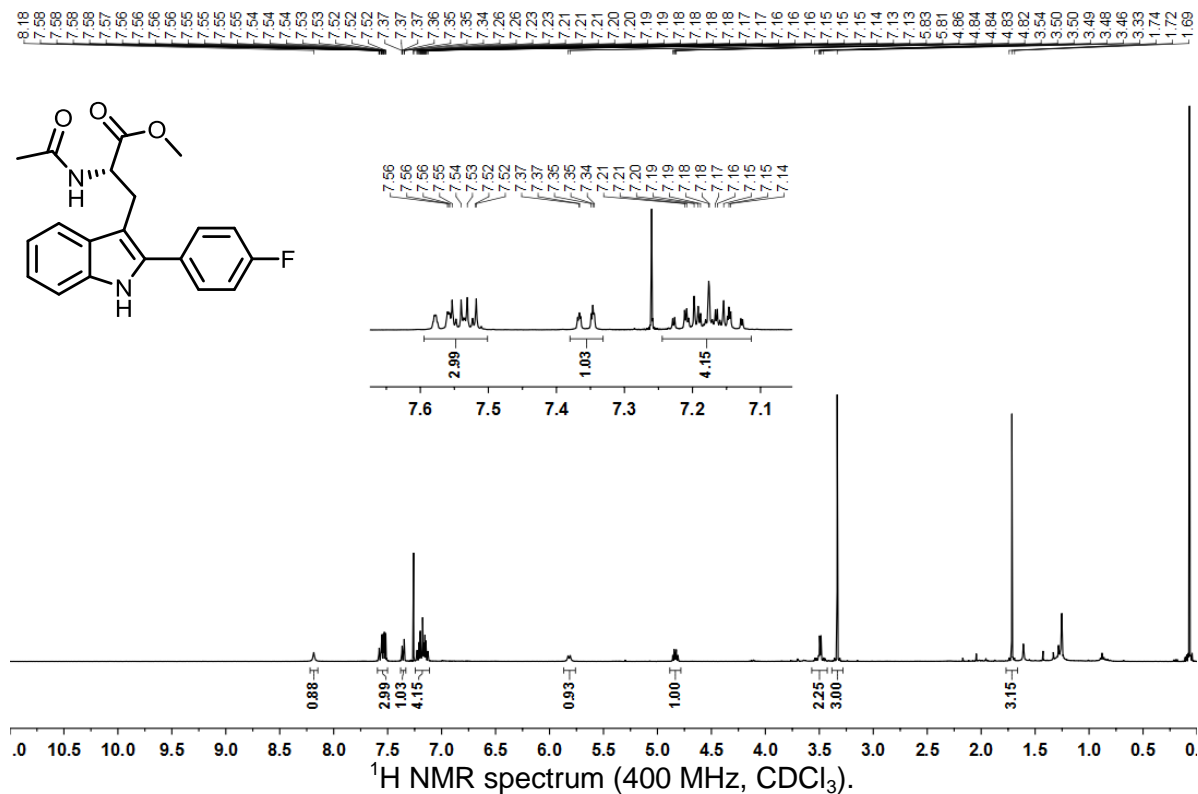

Filename: d0368ajr  
Reference: Alan ReayAJR-5-417

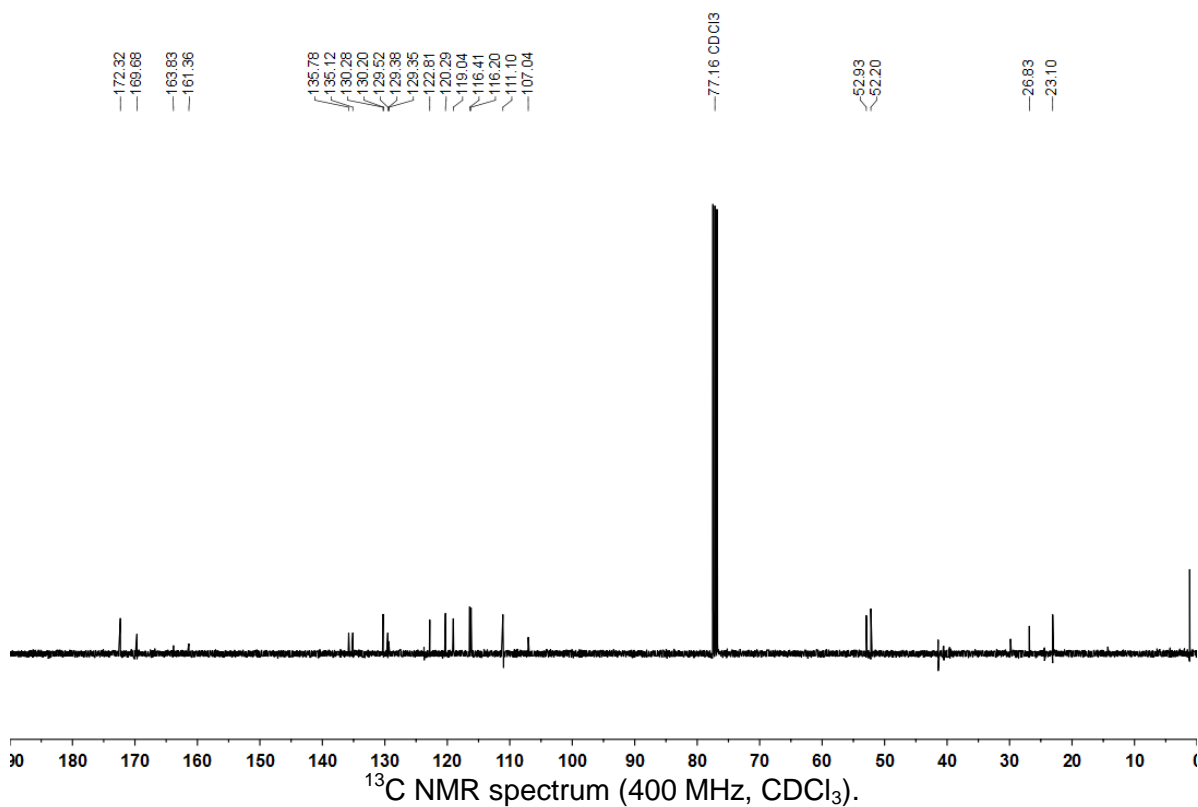

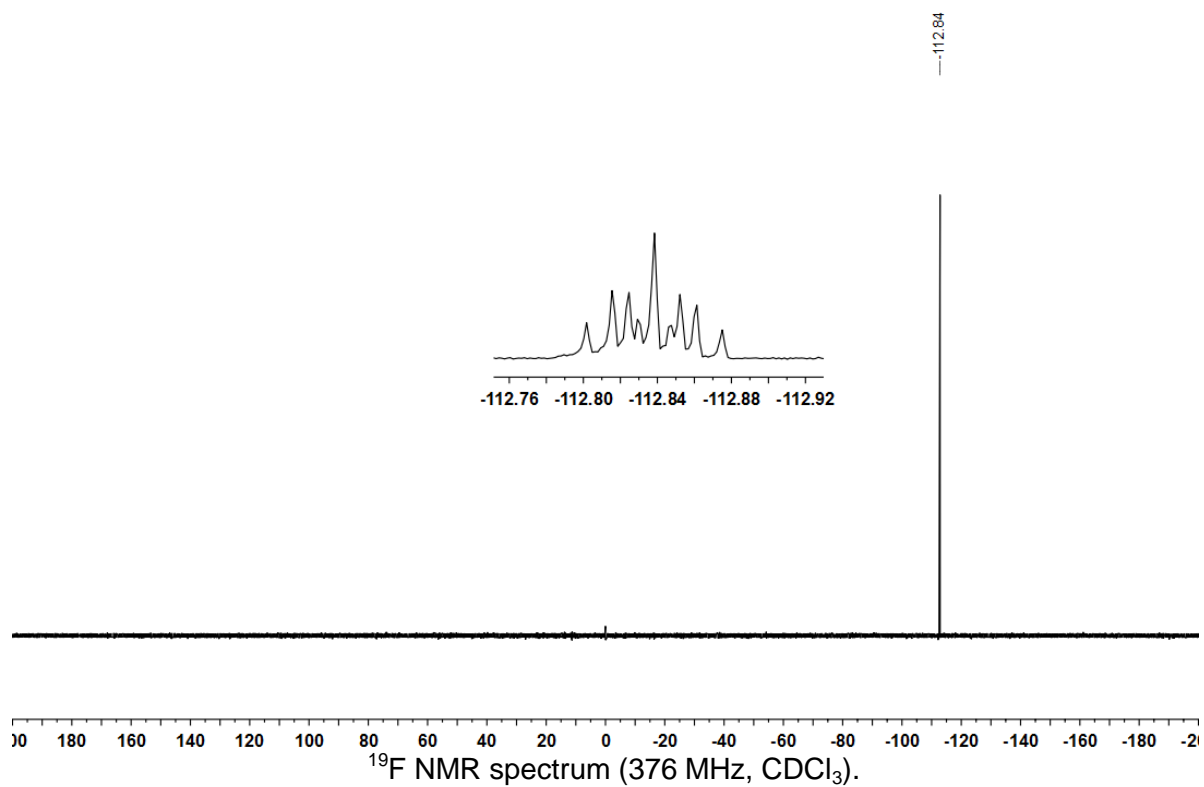

# Methyl (2S)-2-acetamido-3-[2-(2,4,6-trimethylphenyl)-1H-indol-3-yl]propanoate, 2f

Filename: c6834ajr  
Reference: Alan Reay AJR-5-402

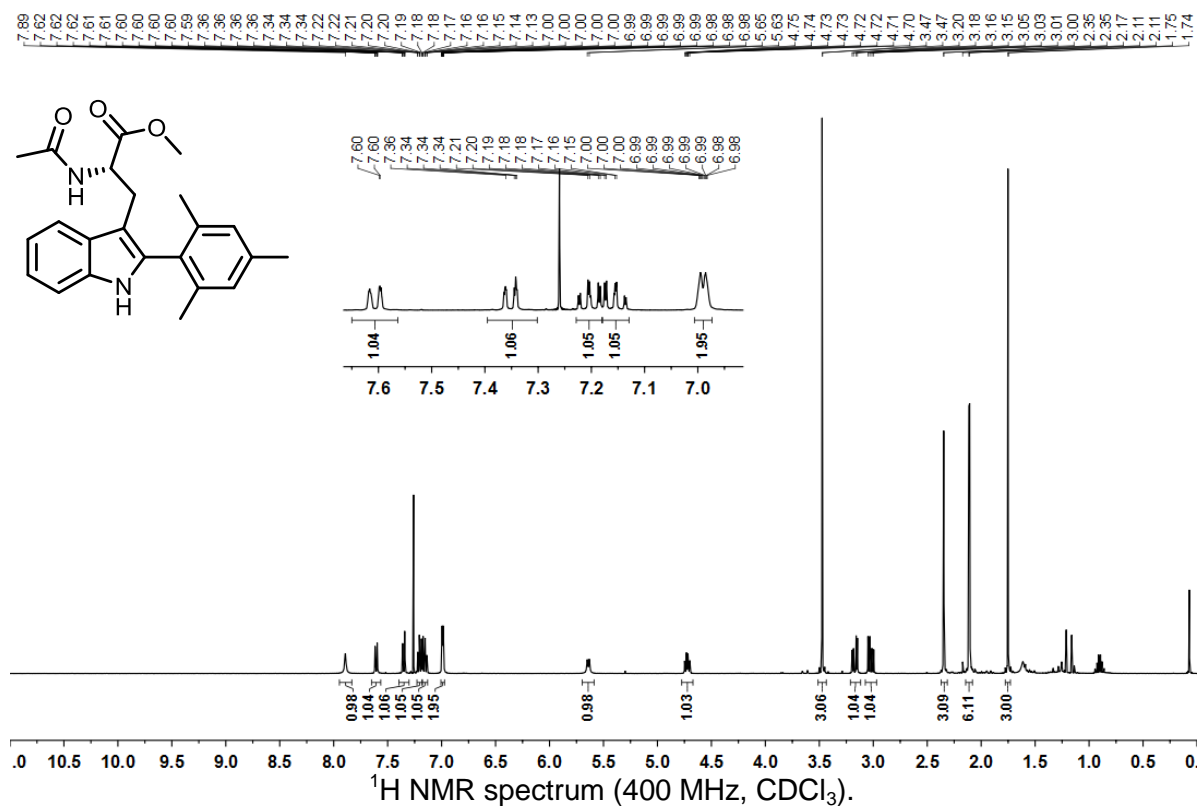

# Phenyl(2,4,6-trimethylphenyl)iodonium trifluoromethanesulfonate, **11a**

Filename: b8803ajr  
Reference: Alan ReayAJR-2-153

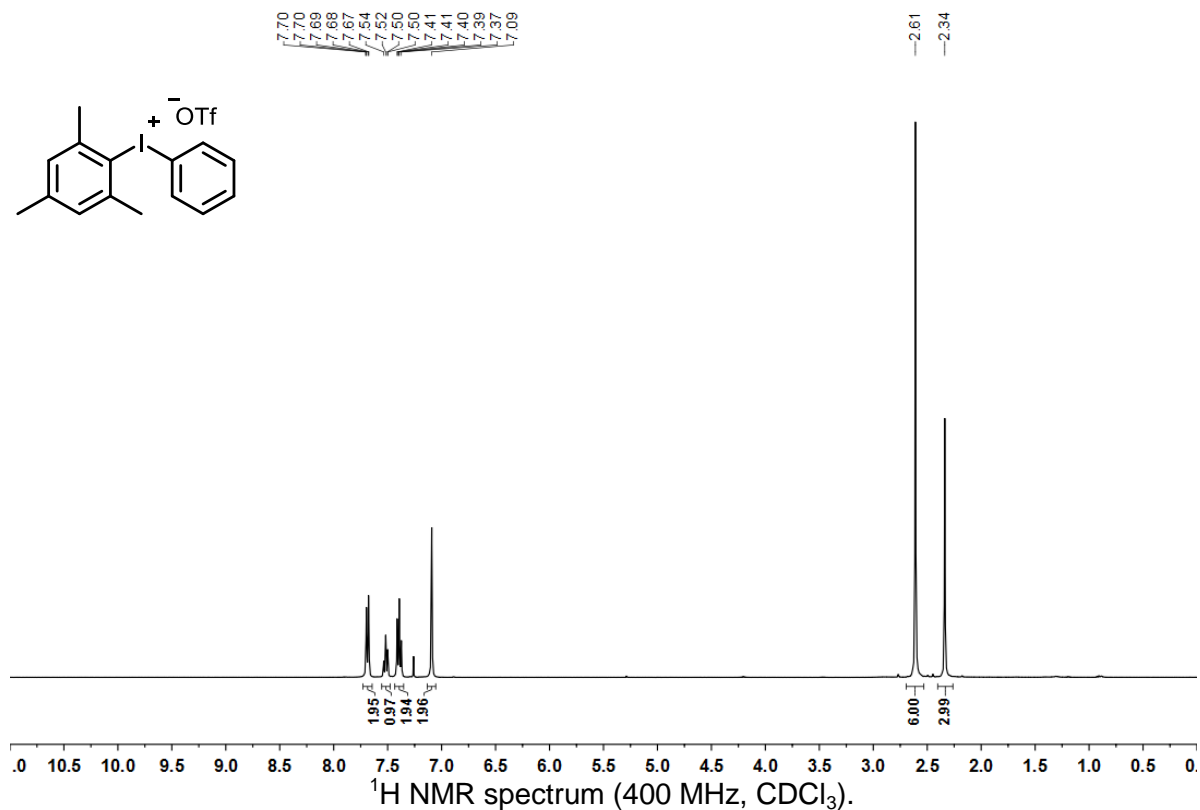

Filename: b8803ajr  
Reference: Alan ReayAJR-2-153

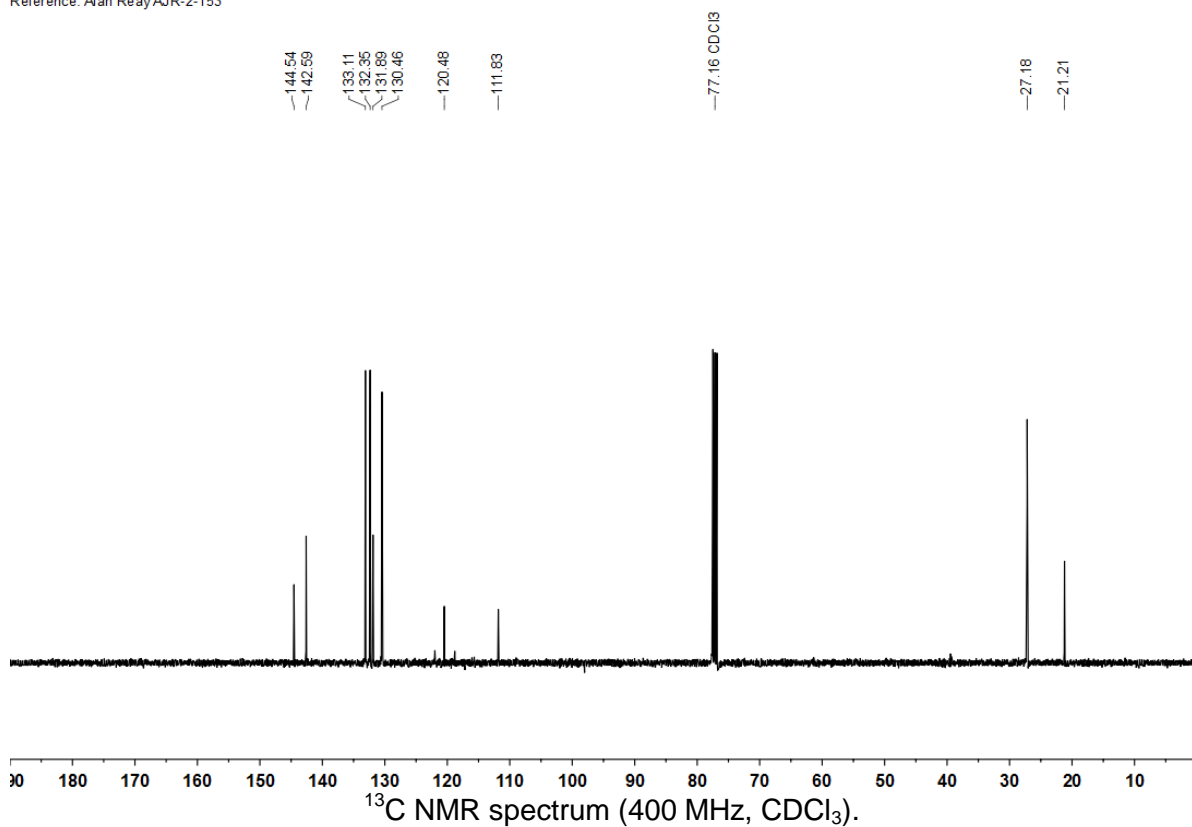

# Phenyl(2,4,6-triisopropylphenyl)iodonium trifluoromethanesulfonate, **11b**

Filename: b9302ajr  
Reference: Alan ReayAJR-2-165

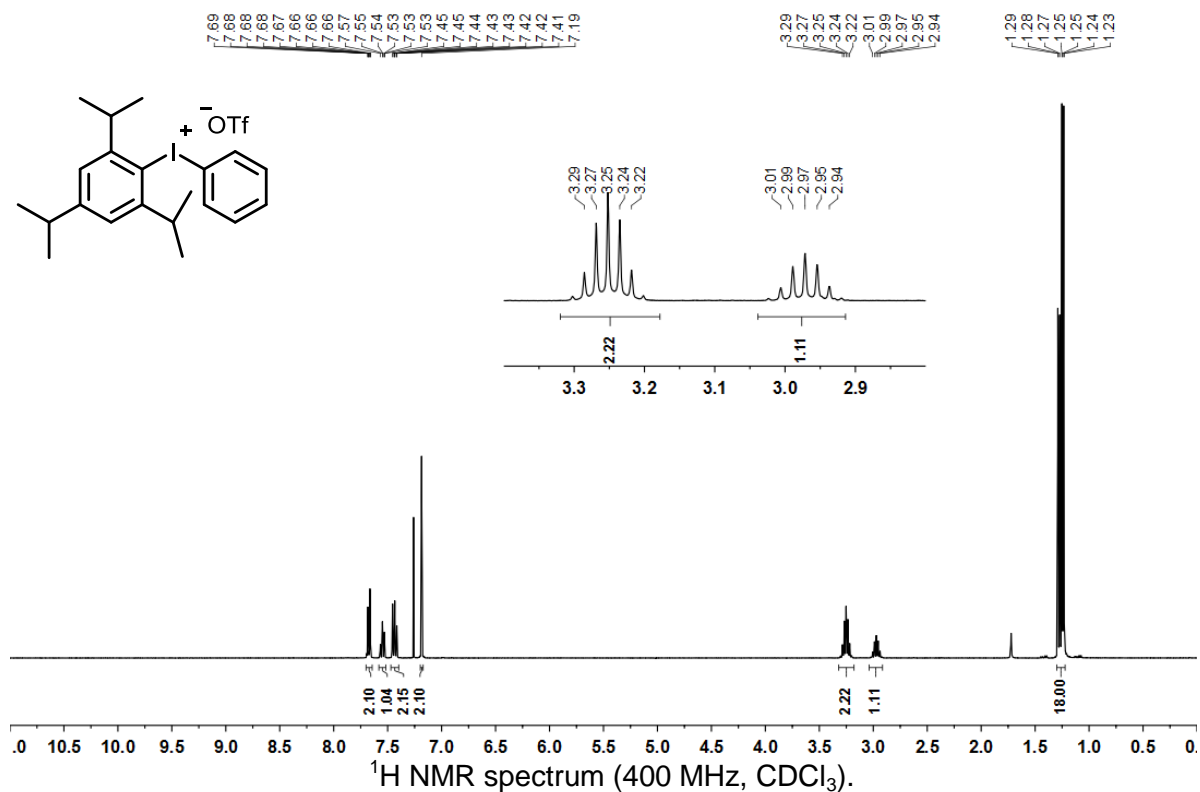

Filename: b9302ajr  
Reference: Alan ReayAJR-2-165

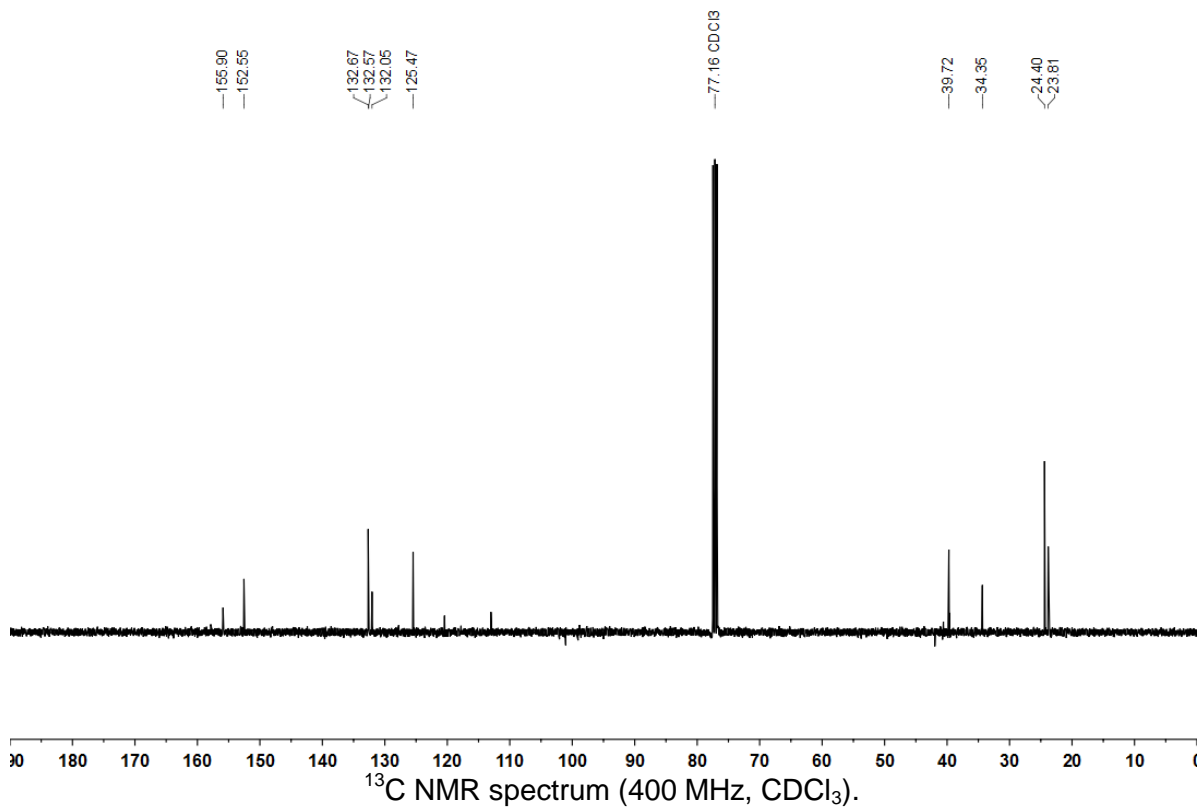

# Methyl (2S)-3-(2-phenyl-1H-indol-3-yl)-2-(trifluoroacetamido)propanoate, **12a**

Filename: m8655ajr  
Reference: Alan ReayAJR-4-346-2

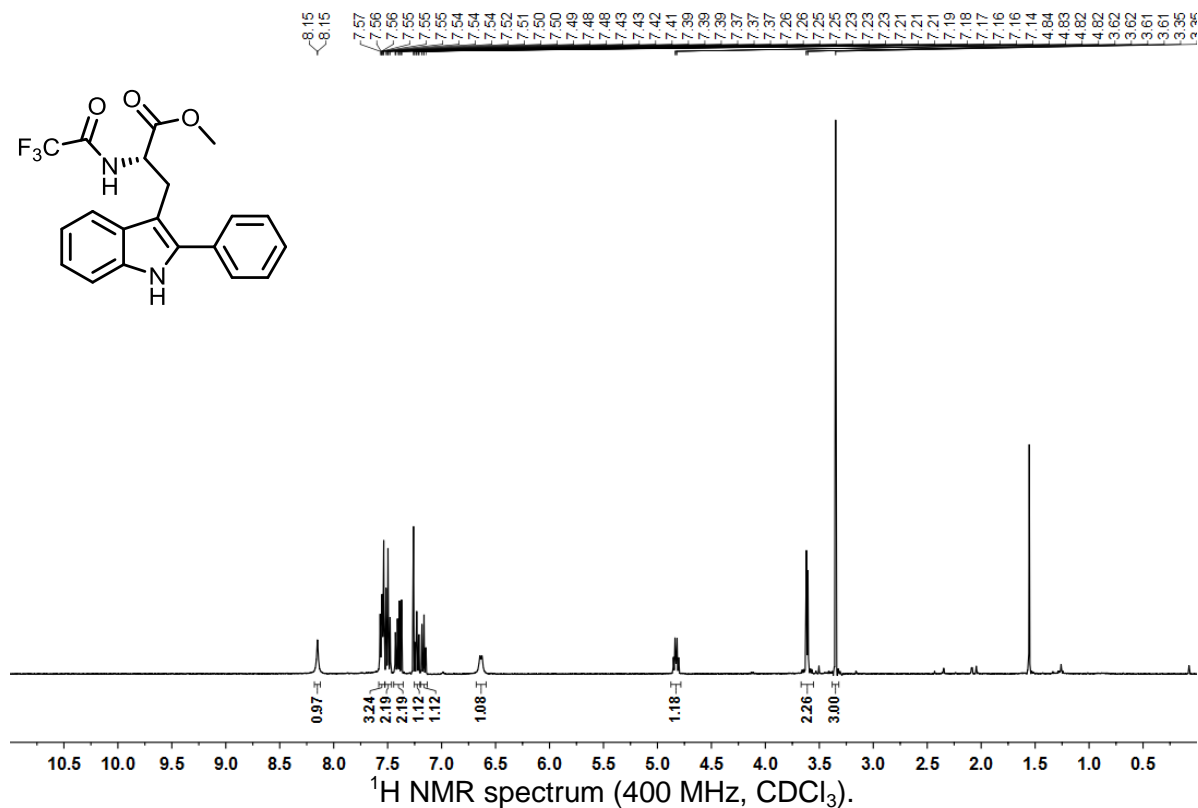

Filename: c4848ajr  
Reference: Alan ReayAJR-4-346-2

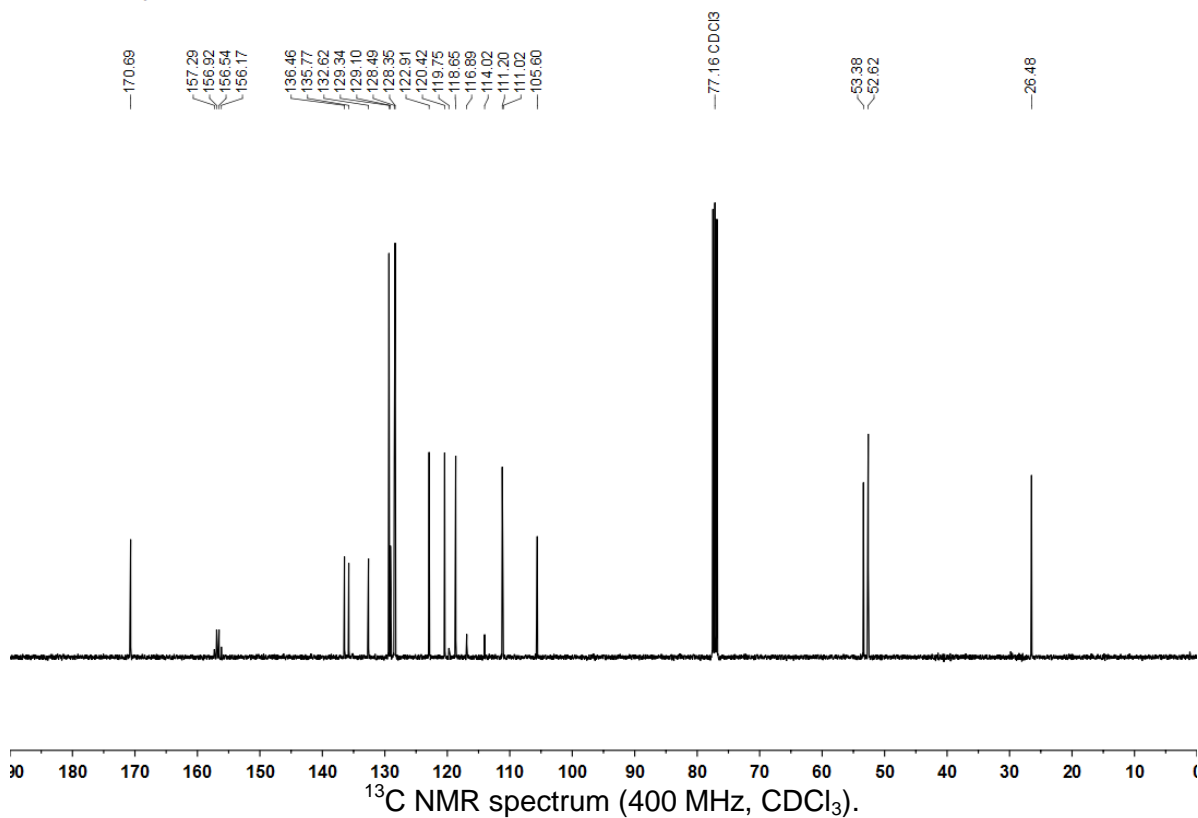

Filename: m8655ajr  
Reference: Alan ReayAJR-4-346-2

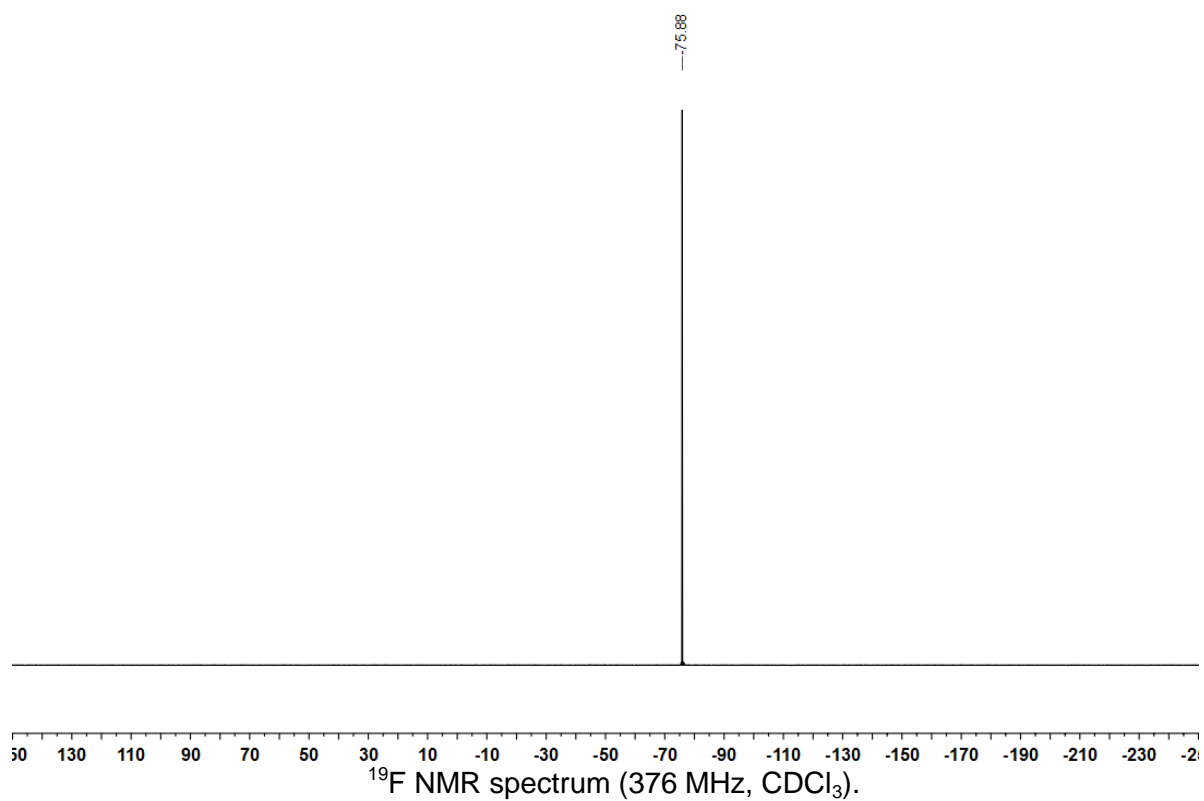





Filename: d0671ajr  
Reference: Alan ReayAJR-5-427

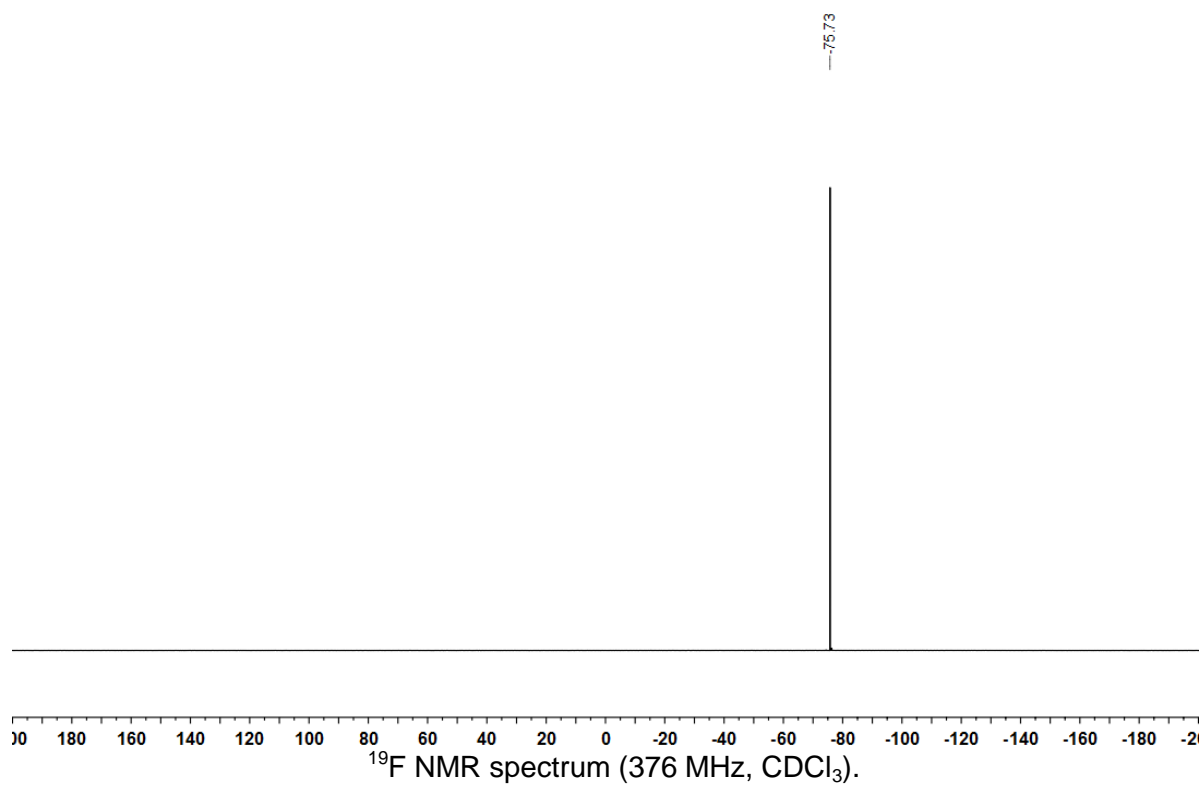

## 2-(Trifluoroacetamido)acetic acid

Filename: c4443ajr  
Reference: Alan ReayAJR-4-342

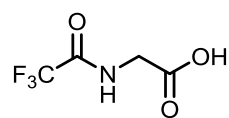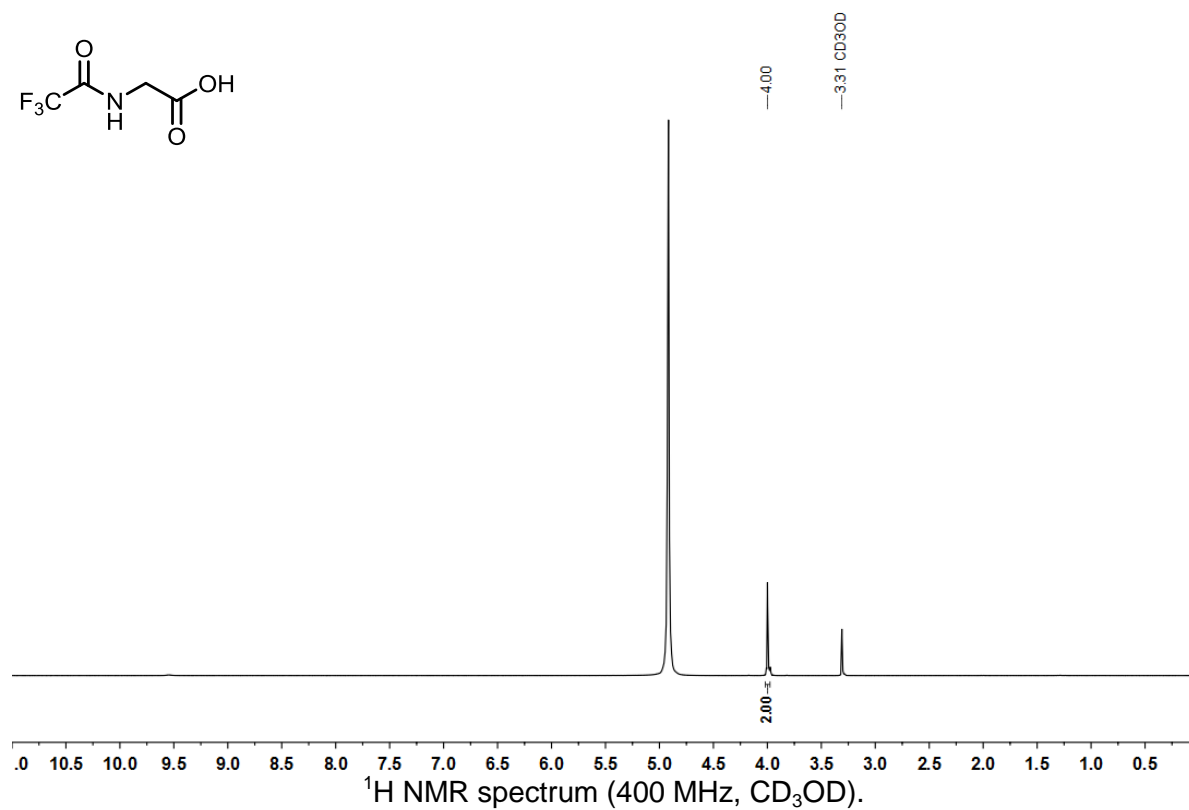

Filename: c4849ajr  
Reference: Alan ReayAJR-4-342

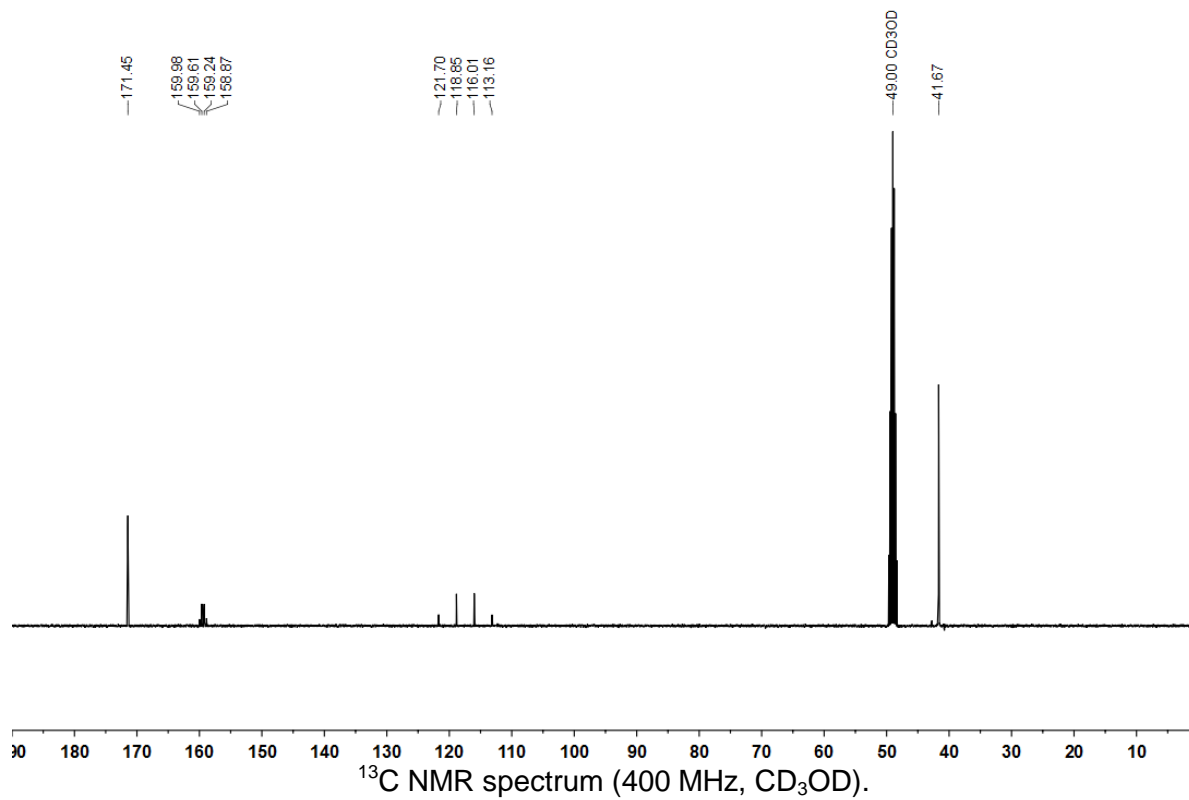

Filename: c4443ajr  
Reference: Alan ReayAJR-4-342

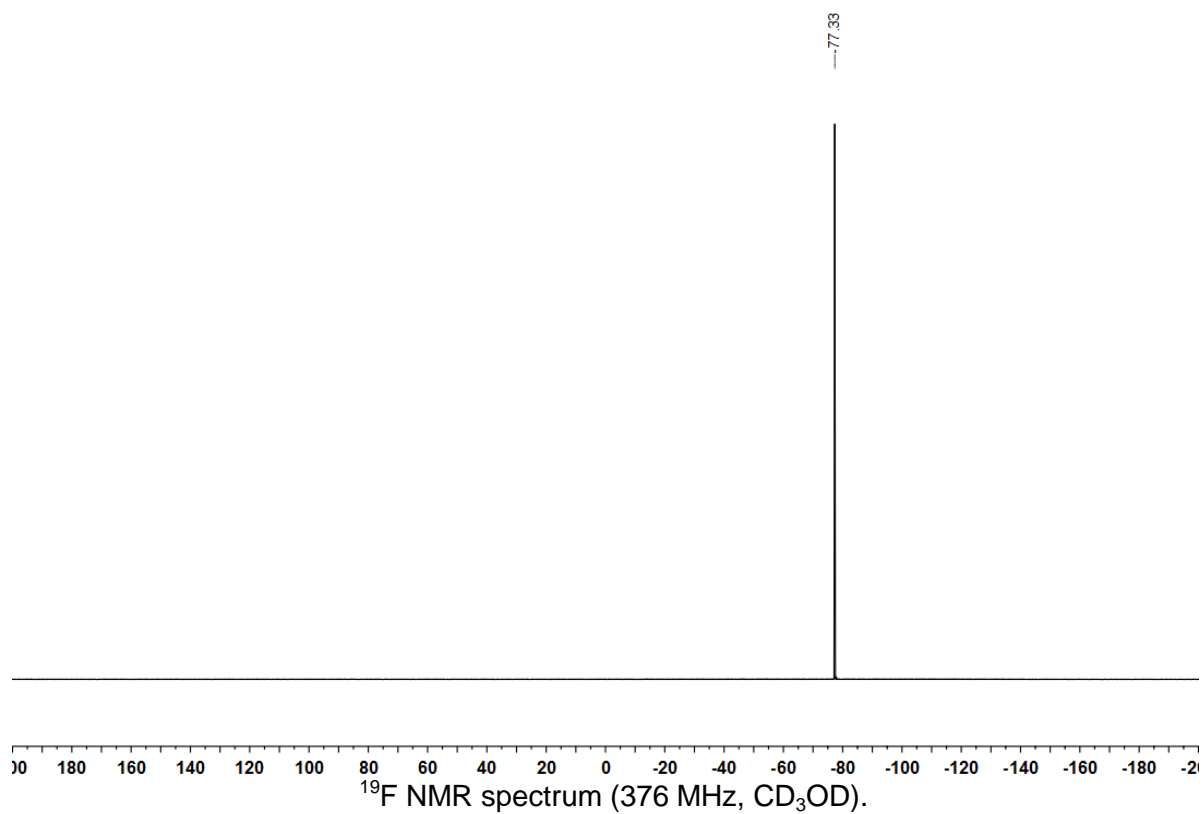

# Methyl (2S)-3-(1H-indol-3-yl)-2-[2-(trifluoroacetamido)acetamido]propanoate, **13**

Filename: c4736ajr  
Reference: Alan ReayAJR-4-345-1

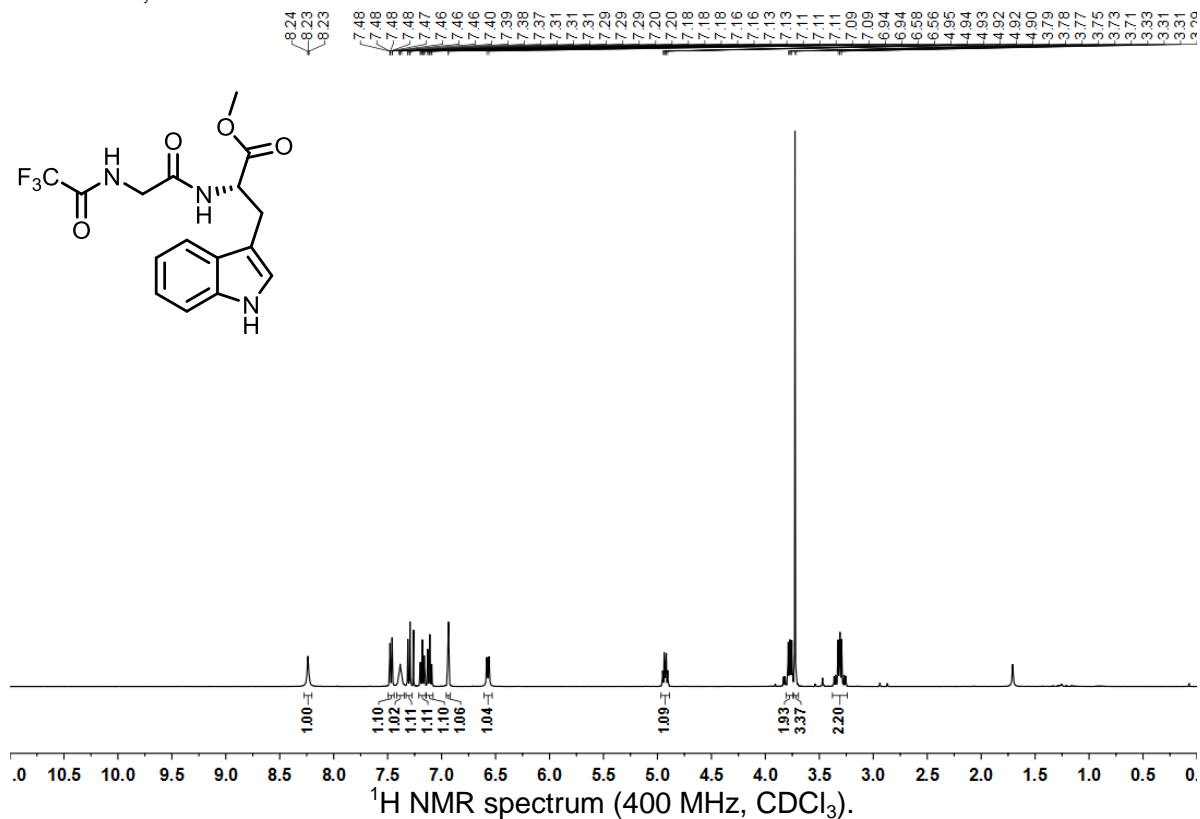

Filename: c4804ajr  
Reference: Alan ReayAJR-4-345-1

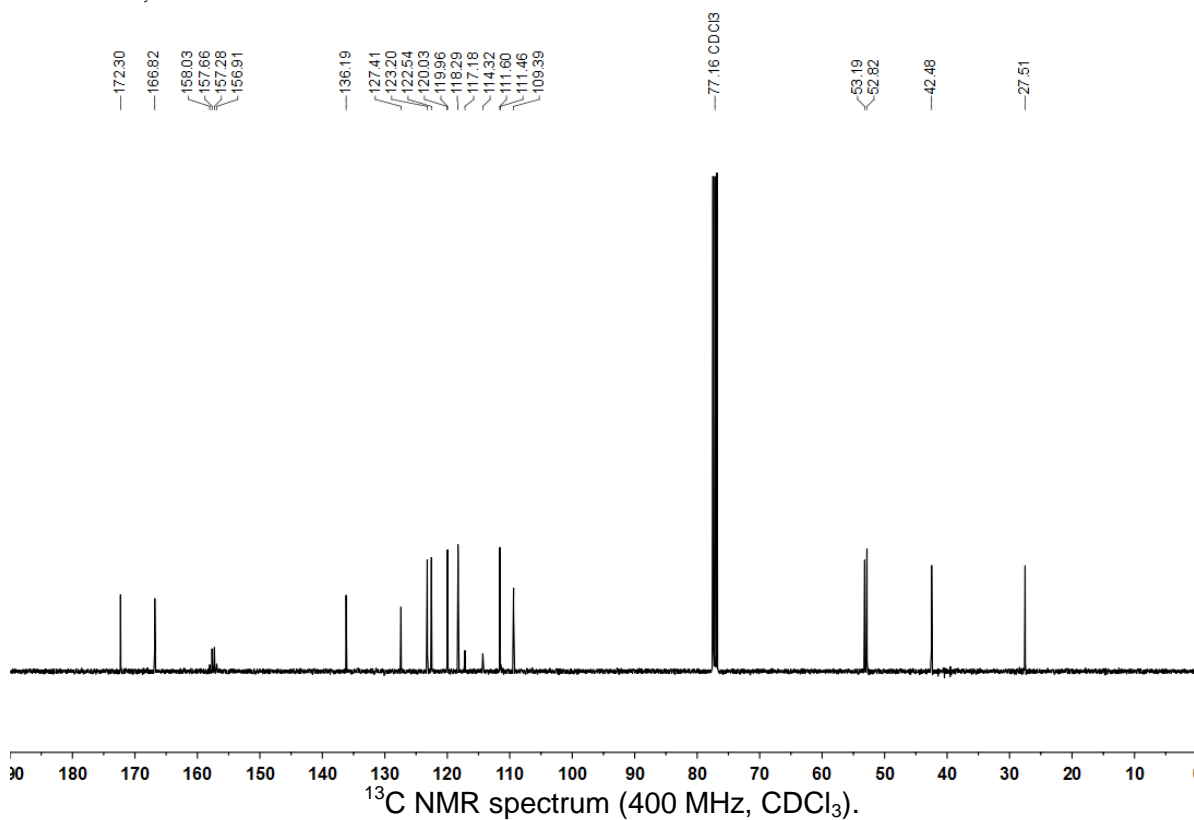

Filename: c4736ajr  
Reference: Alan ReayAJR-4-345-1

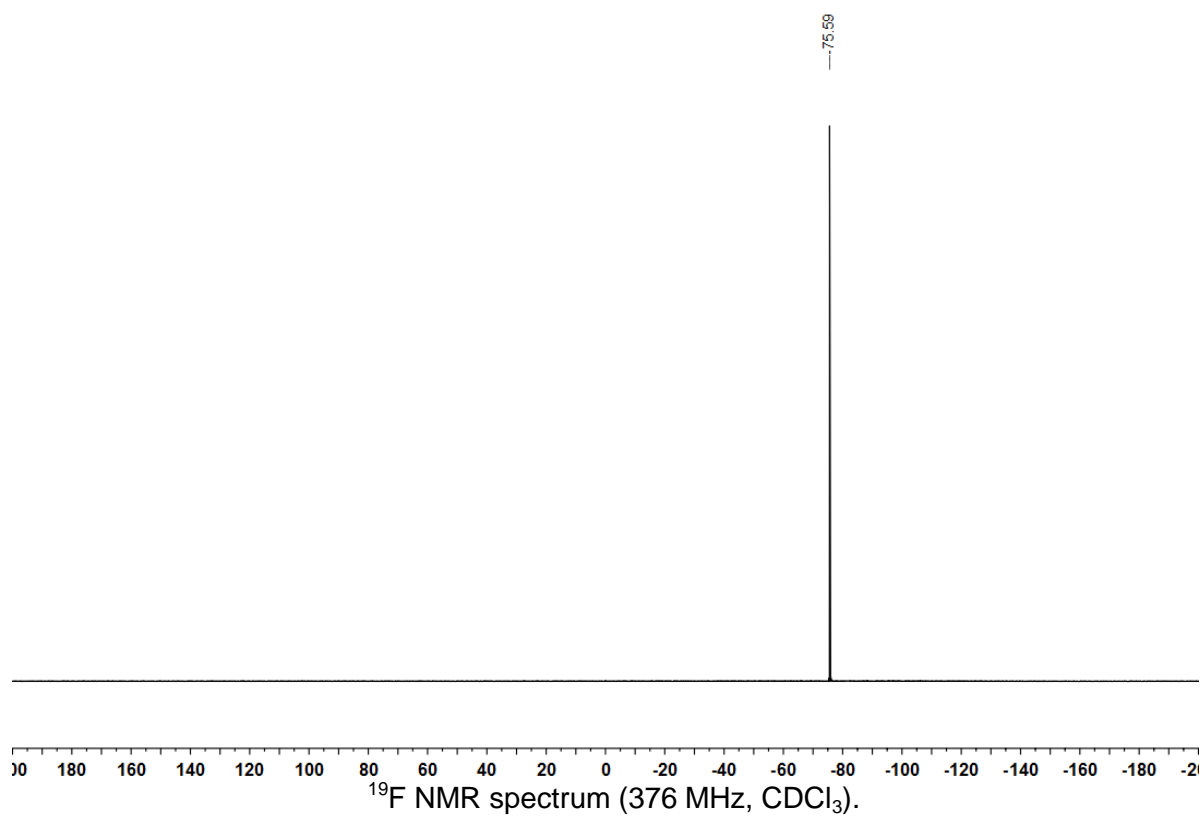

Methyl (2S)-3-(2-phenyl-1H-indol-3-yl)-2-[2-(trifluoroacetamido)acetamido]propanoate, **14a**

Filename: m8619ajr  
Reference: Alan ReayAJR-4-349-2

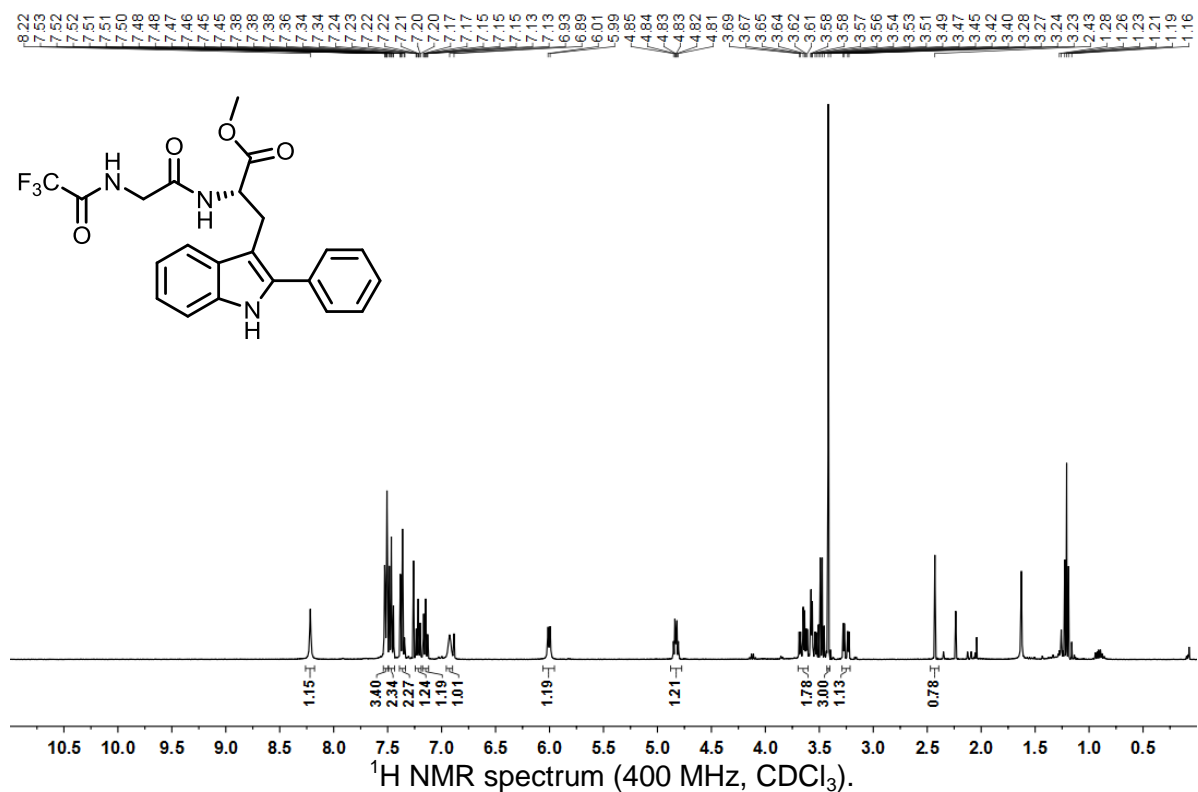

Filename: c7042ajr  
Reference: Alan ReayAJR-4-349-2

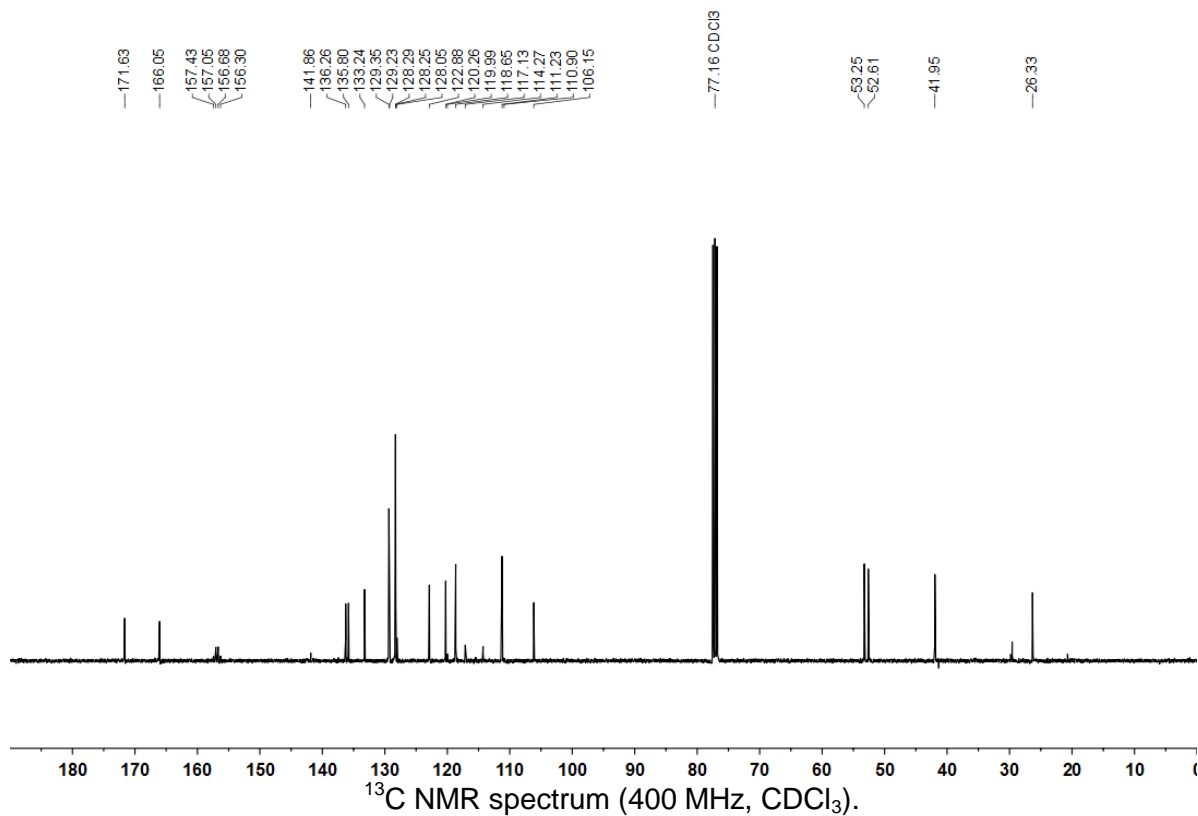

Filename: m8619ajr  
Reference: Alan ReayAJR-4-349-2

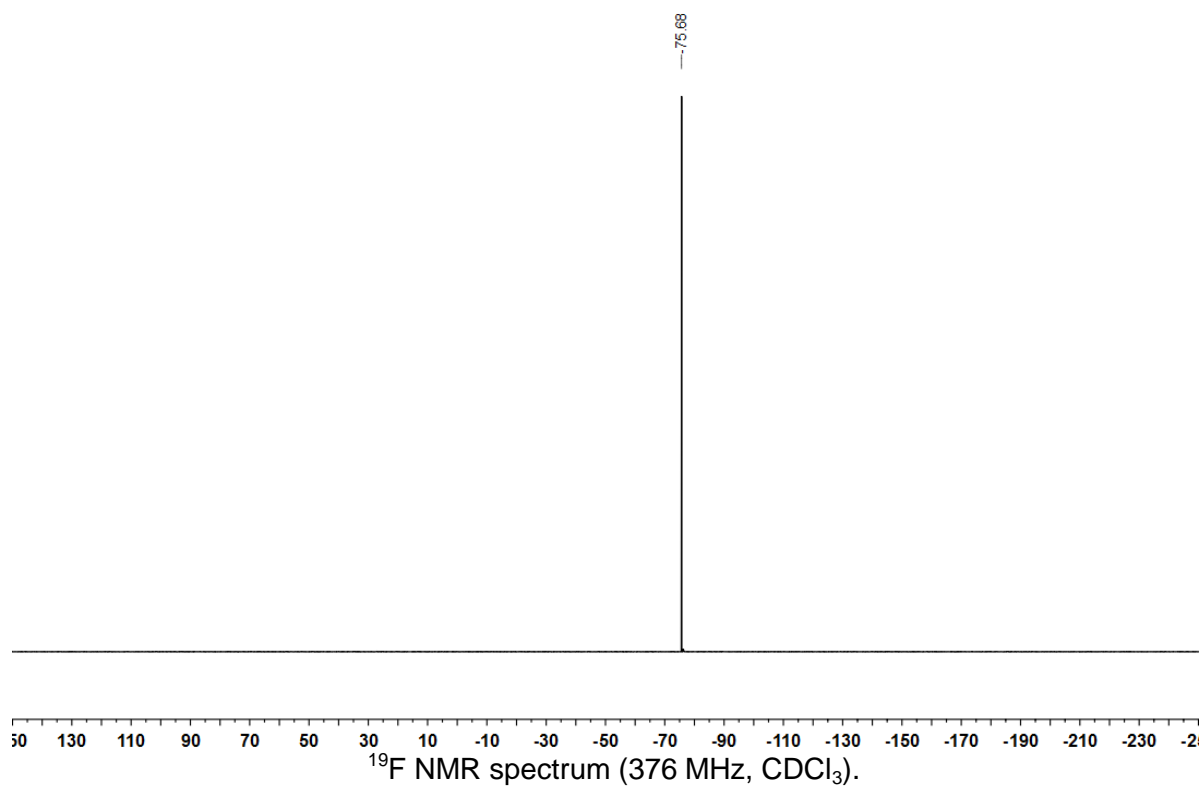



Methyl (2S)-2-[2-(trifluoroacetamido)acetamido]-3-[2-(2,4,6-trimethylphenyl)-1H-indol-3-yl]propanoate, **14b**

Filename: d0838ajr  
Reference: Alan Reay AJR-5-429

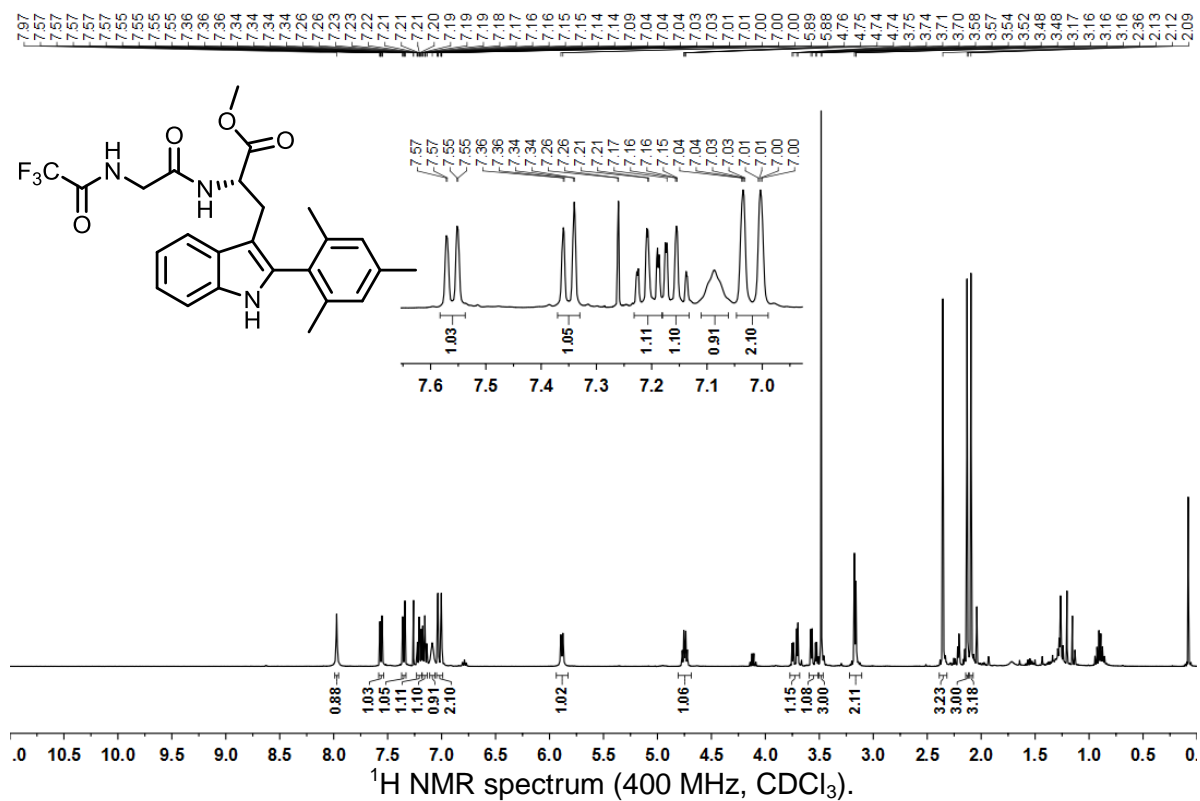

Filename: d0838ajr  
Reference: Alan Reay AJR-5-429

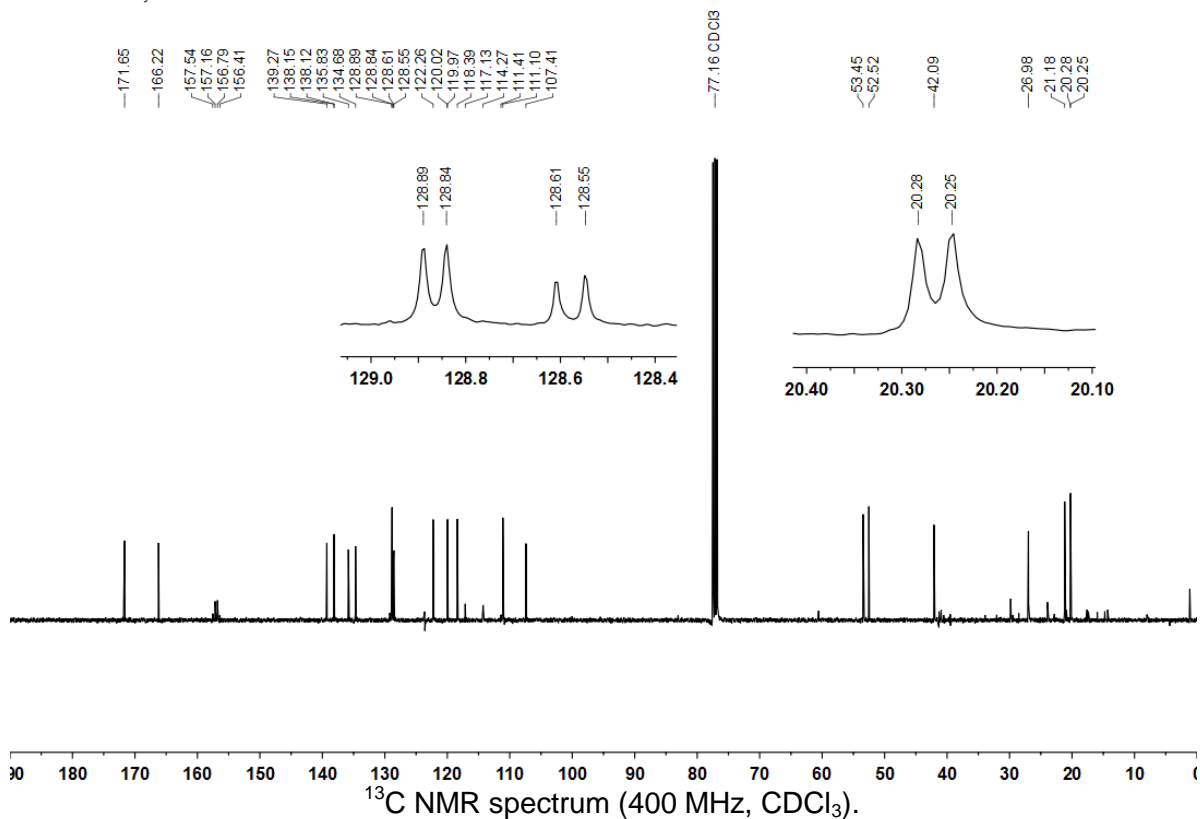

Filename: d0743ajr  
Reference: Alan ReayAJR-5-429

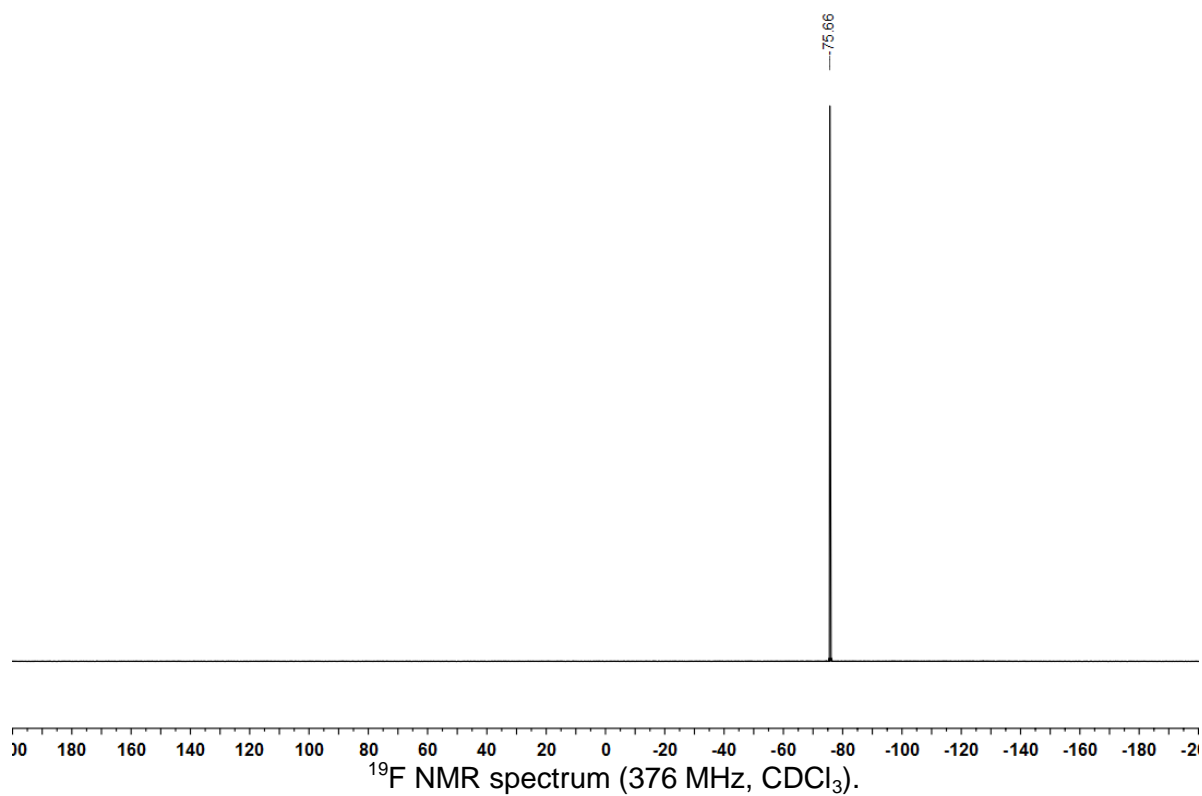

# (2R)-4-Methyl-2-(trifluoroacetamido)pentanoic acid

Filename: m7930ajr  
Reference: Alan ReayAJR-4-334

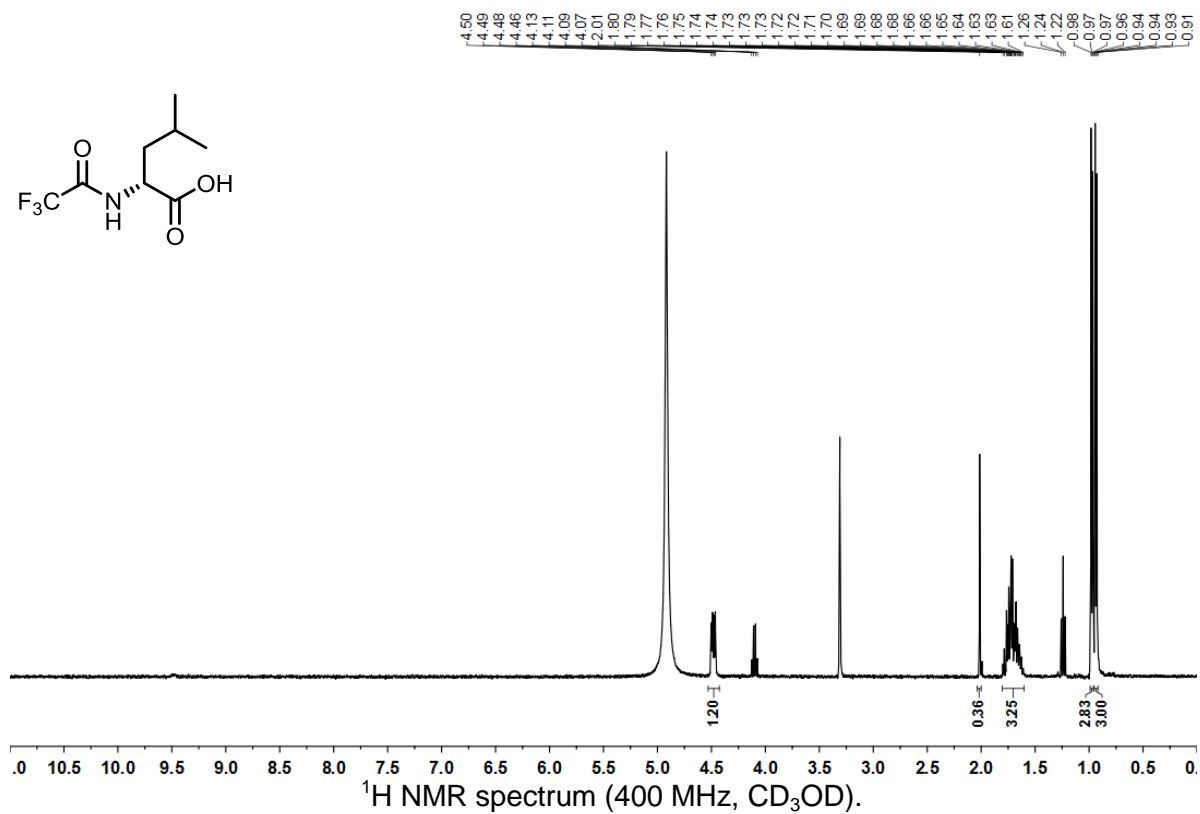

Filename: m7975ajr  
Reference: Alan ReayAJR-4-334

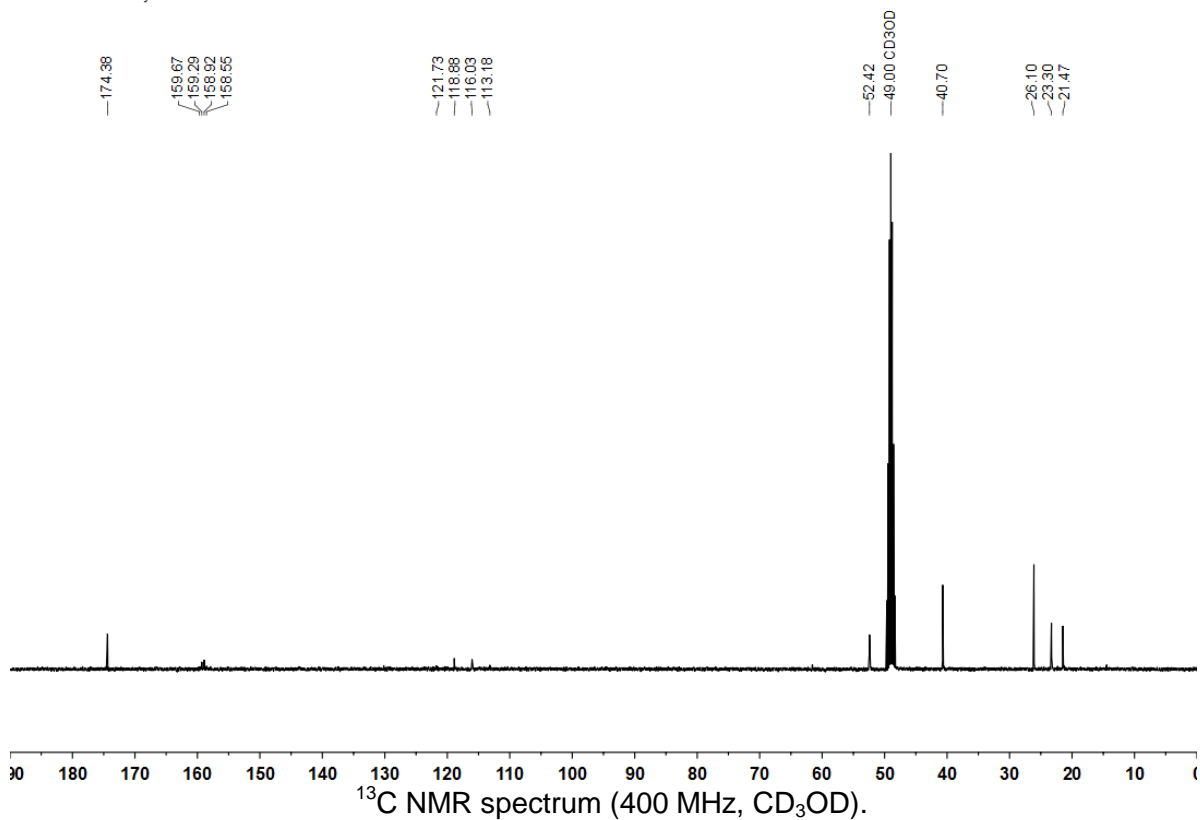

Filename: m7930ajr  
Reference: Alan ReayAJR-4-334

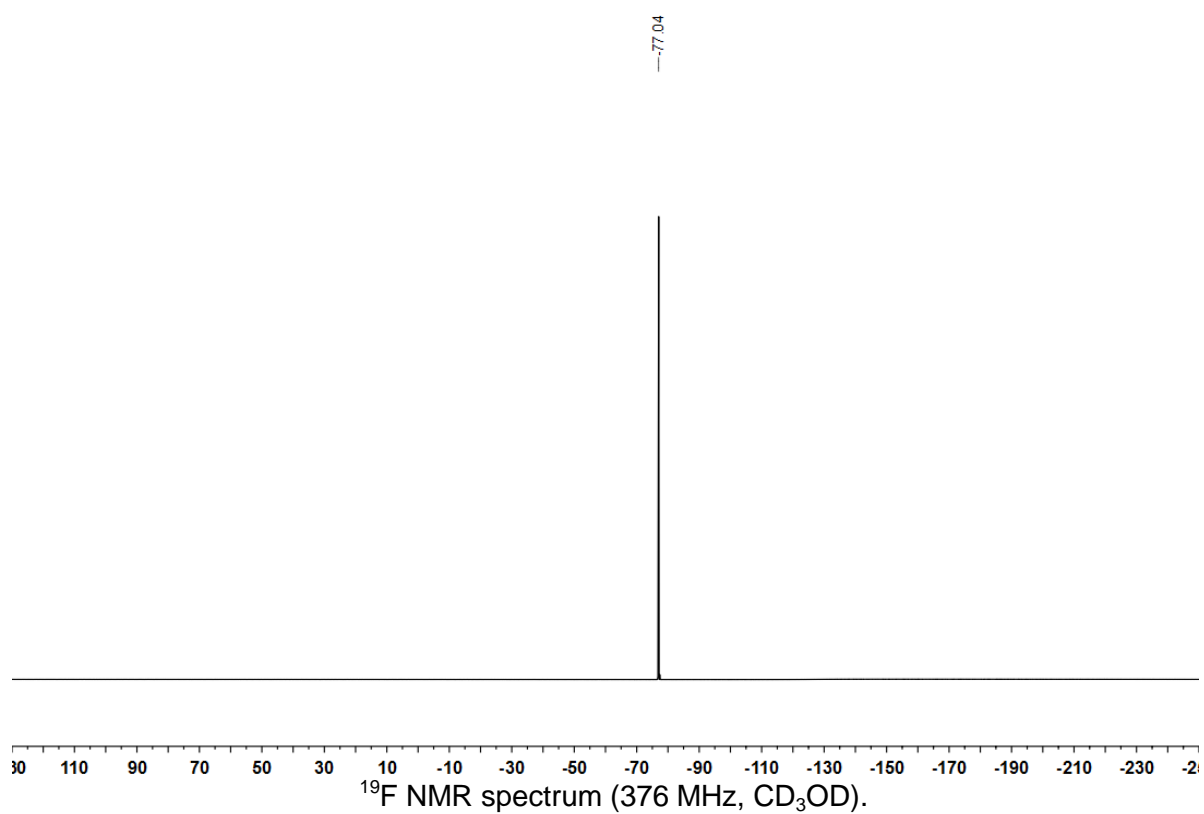

Methyl (2S)-3-(1H-indol-3-yl)-2-[(2R)-4-methyl-2-trifluoroacetamido]pentanamido]propanoate, **15**

Filename: c4735ajr  
Reference: Alan Reay AJR-4-344

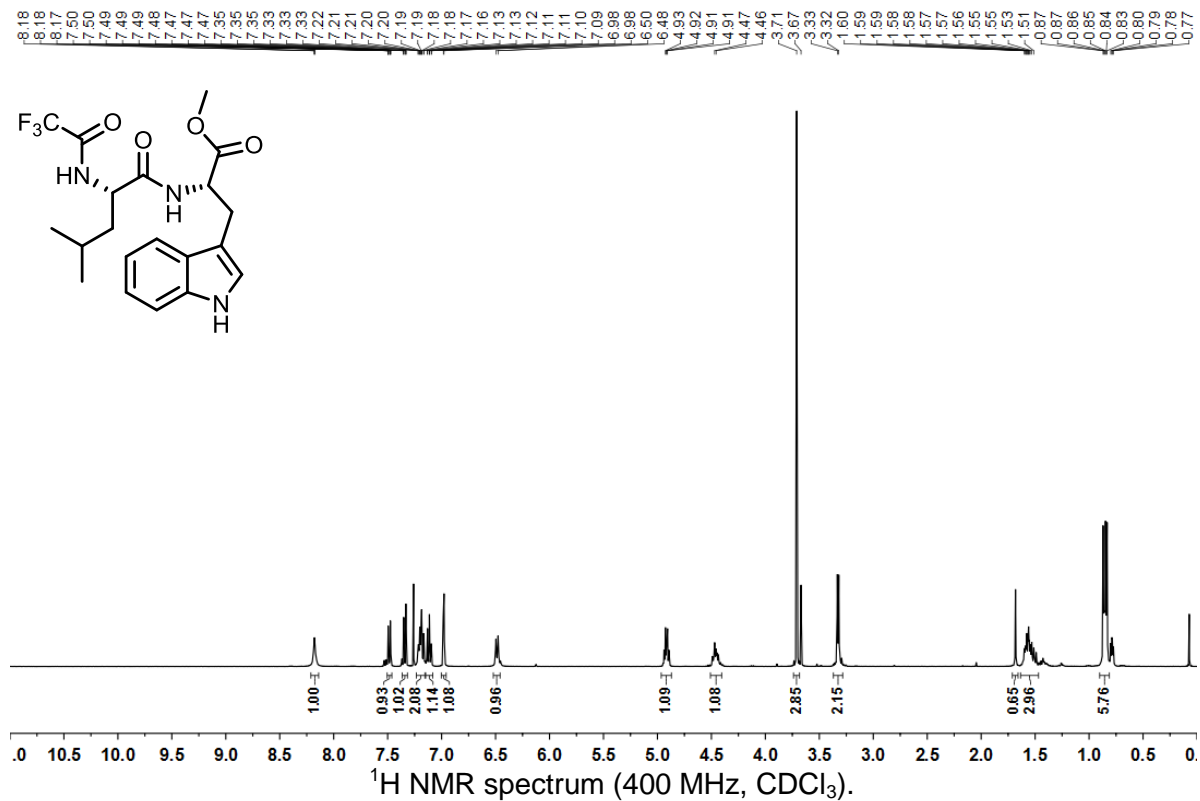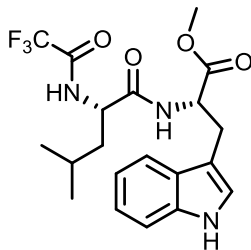

Filename: c7166ajr  
Reference: Alan Reay AJR-4-344

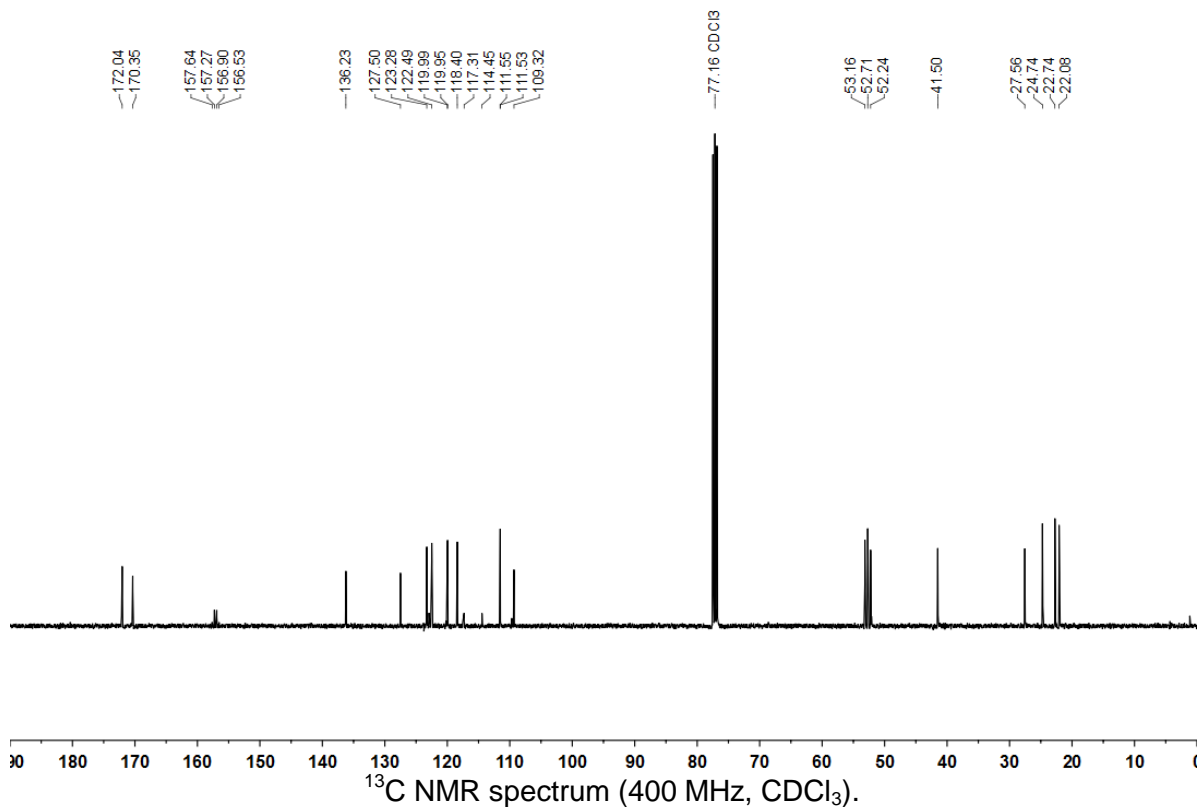

Filename: c4735ajr  
Reference: Alan ReayAJR-4-344

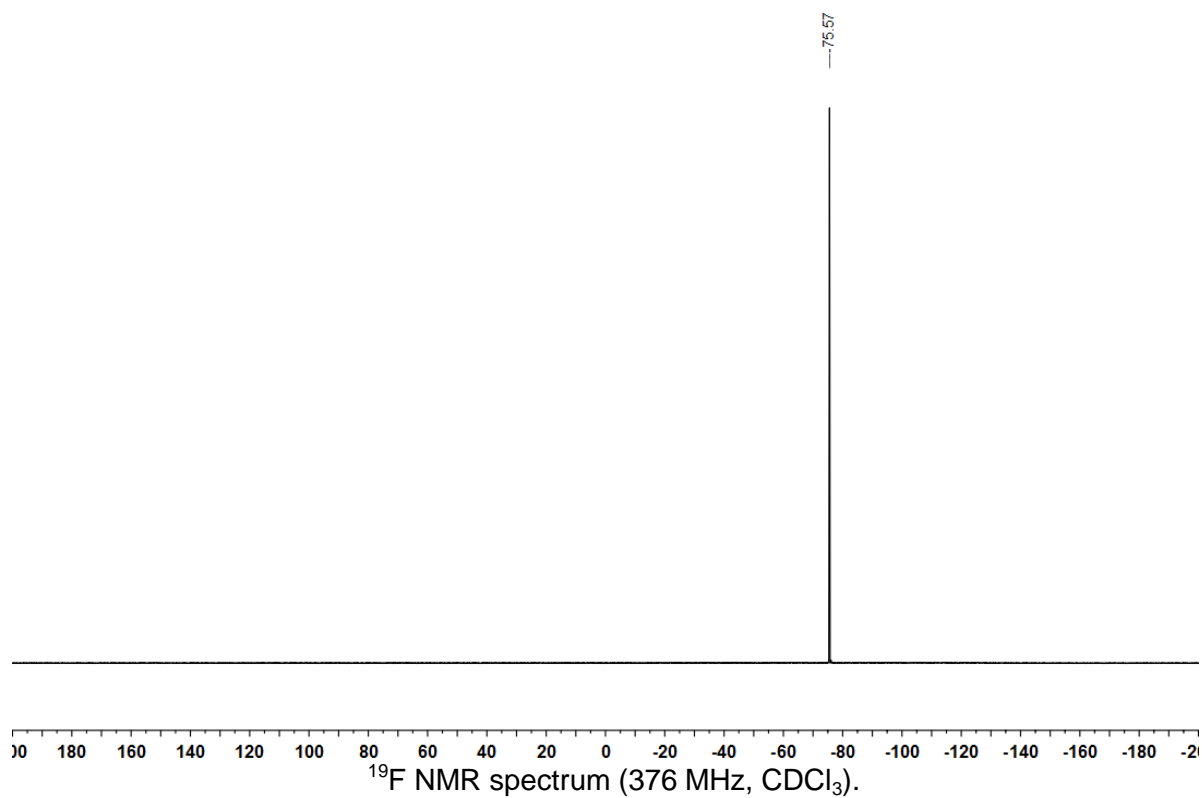

# Methyl (2S)-2-[(2R)-4-methyl-2-(trifluoroacetamido)pentanamido]-3-(2-phenyl-1H-indol-3-yl)propanoate, **16a**

Filename: c4774ajr  
Reference: Alan Reay AJR-4-348-2

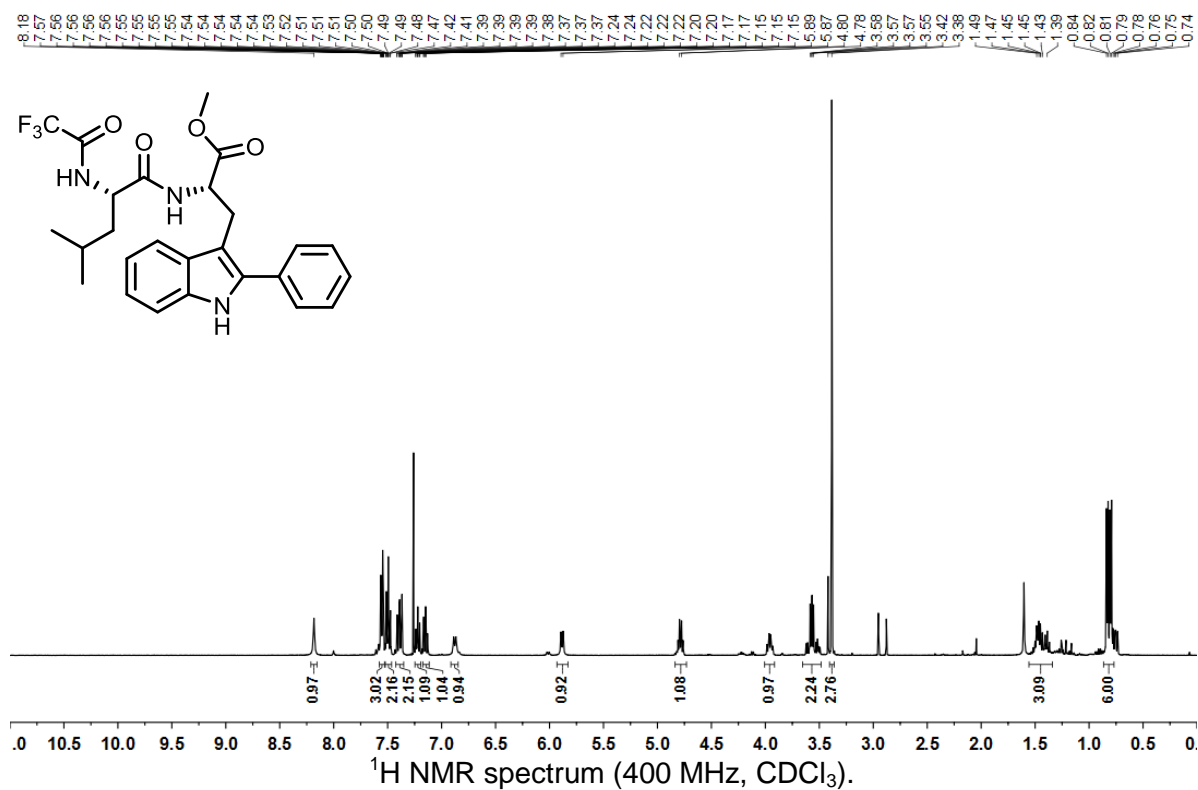

Filename: c6993ajr  
Reference: Alan Reay AJR-4-354-2

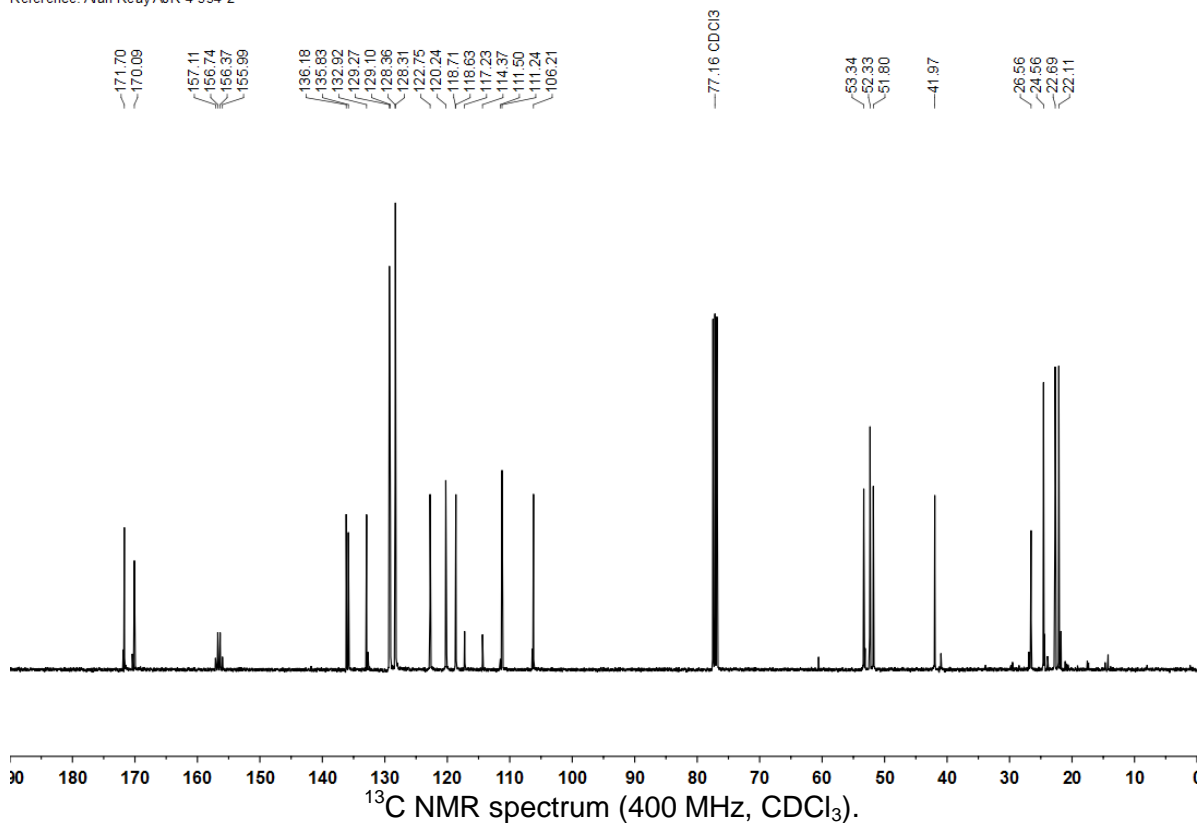

Filename: c4774ajr  
Reference: Alan ReayAJR-4-348-2

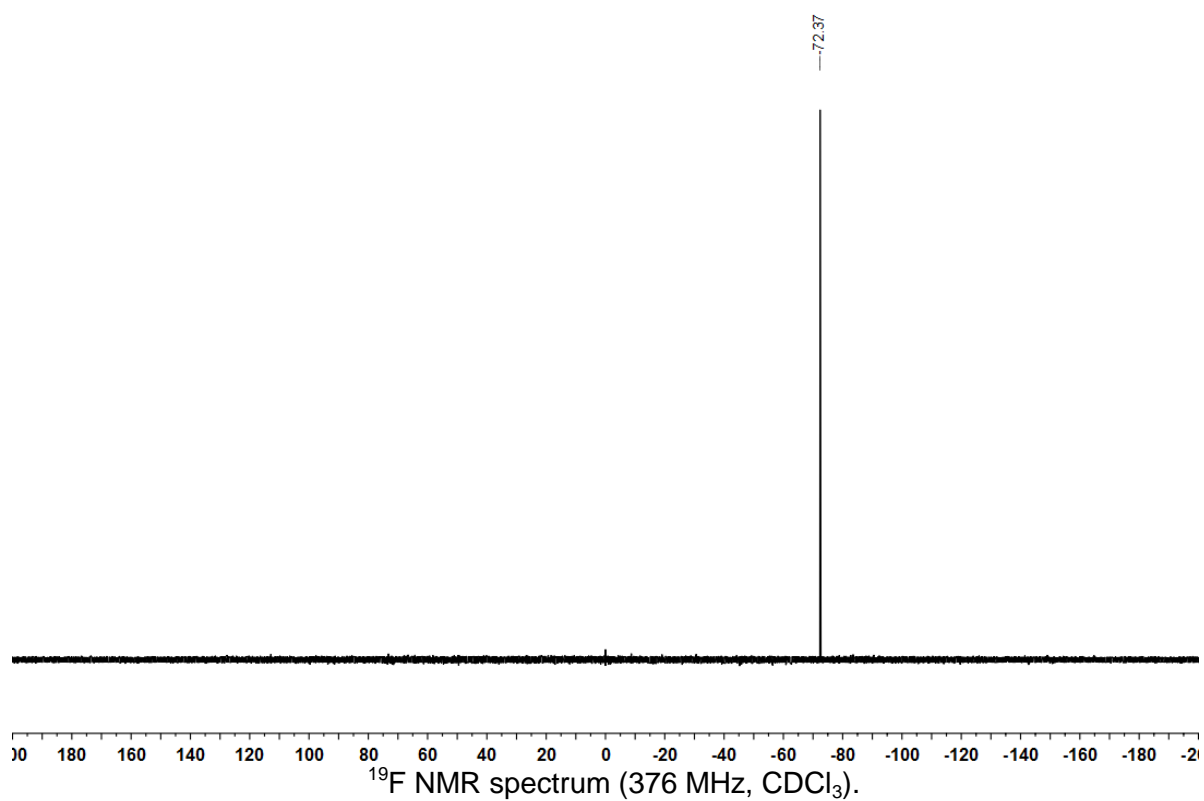



Methyl (2S)-2-[(2R)-4-methyl-2-(trifluoroacetamido)pentanamido]-3-[2-(2,4,6-trimethylphenyl)-1H-indol-3-yl]propanoate, **16b**

Filename: m8656ajr  
Reference: Alan Reay AJR-4-348-1

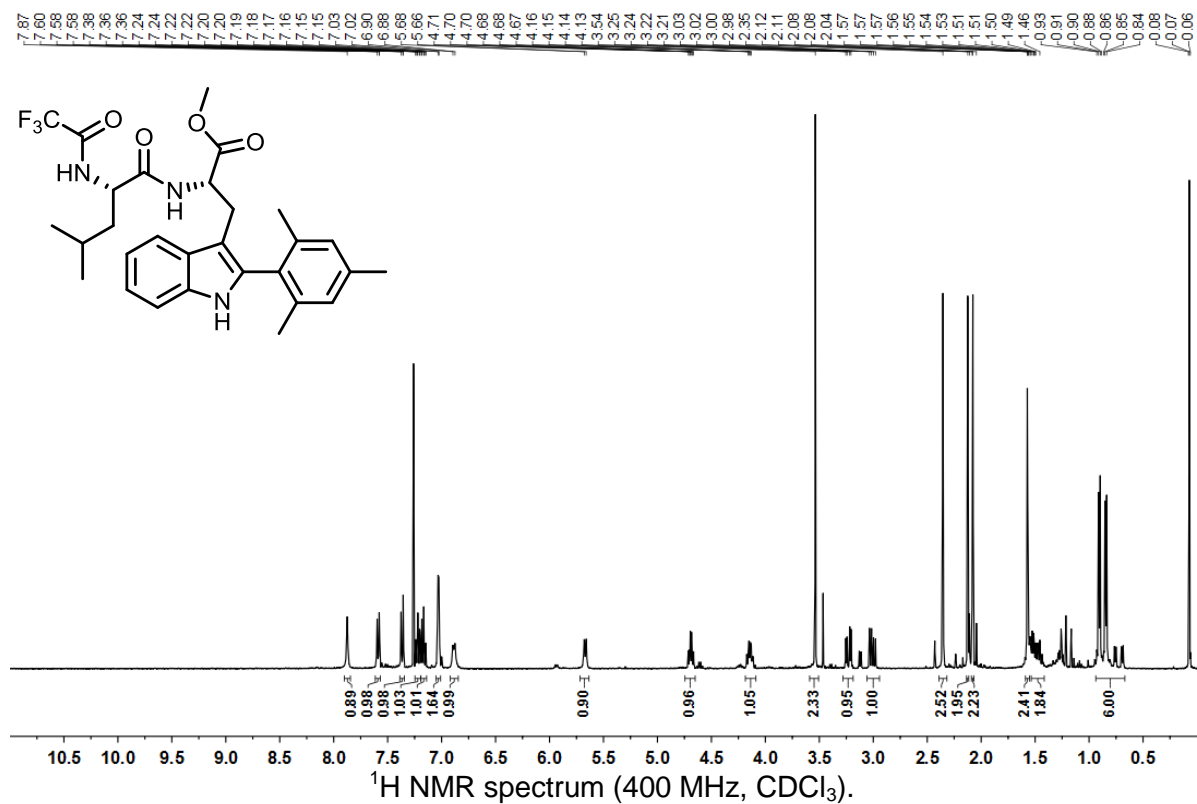

Filename: c6992ajr  
Reference: Alan Reay AJR-4-354-1

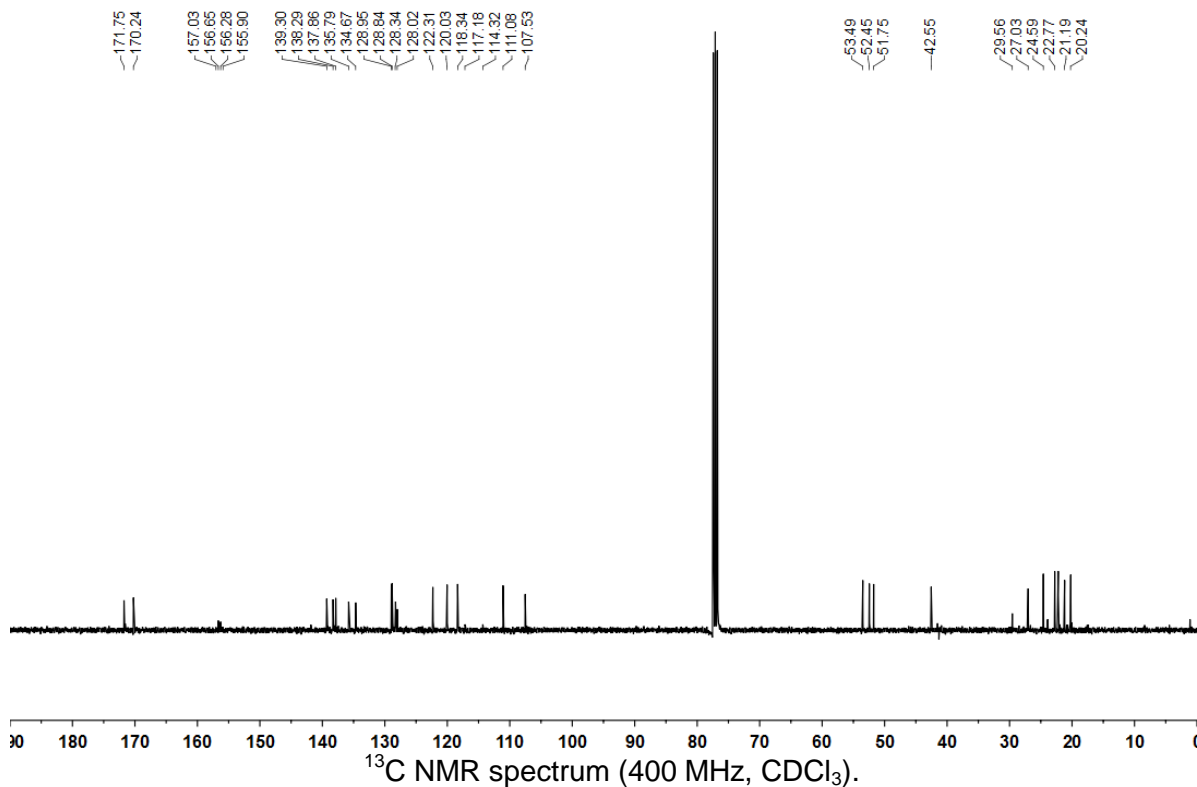

Filename: m8656ajr  
Reference: Alan ReayAJR-4-348-1

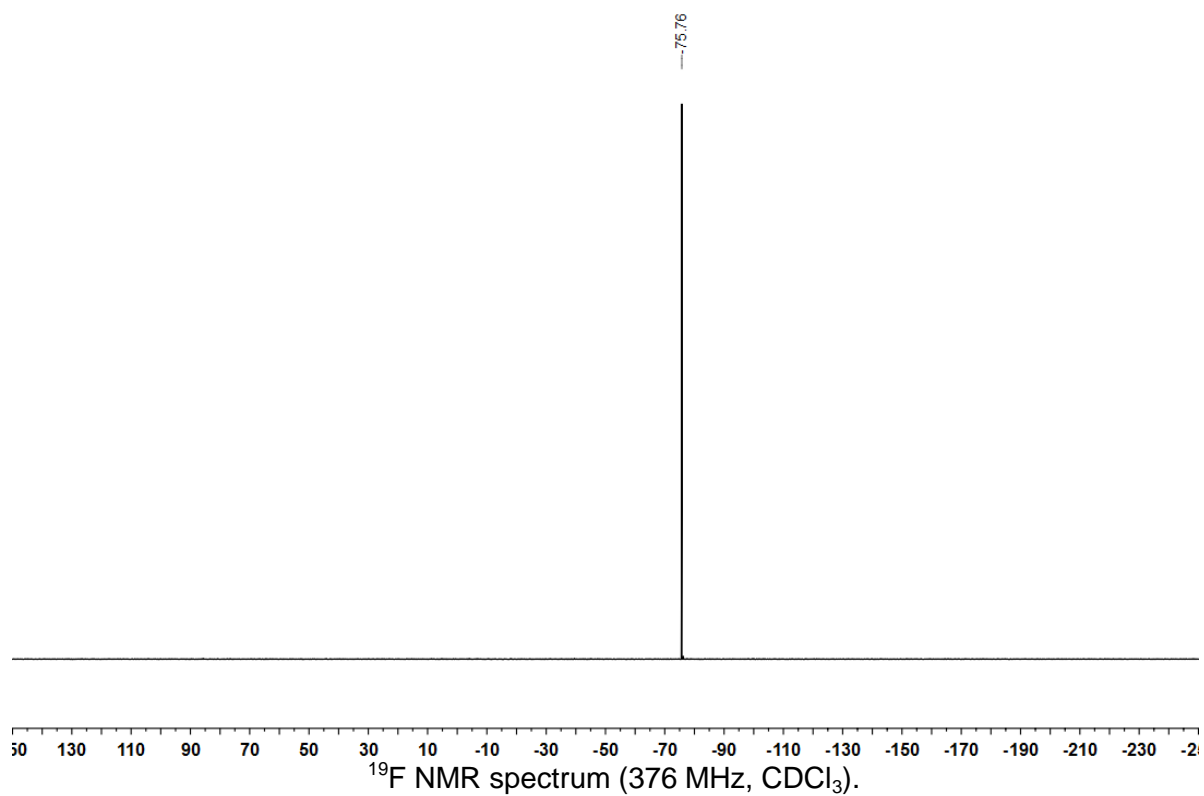

Supplement: c5ob01174d1.pdf [file c5ob01174d1.pdf]
